# Supplementary material for: Identifying Genes Involved in Alkaloid Biosynthesis in Vinca minor through Transcriptomics and Gene Co-Expression Analysis
Source: PubMed Central journal article supplement (PMC7761029; doi:10.3390/biom10121595), 2020-11-24
Supplement: biomolecules-10-01595-s001.pdf [file biomolecules-10-01595-s001.pdf]

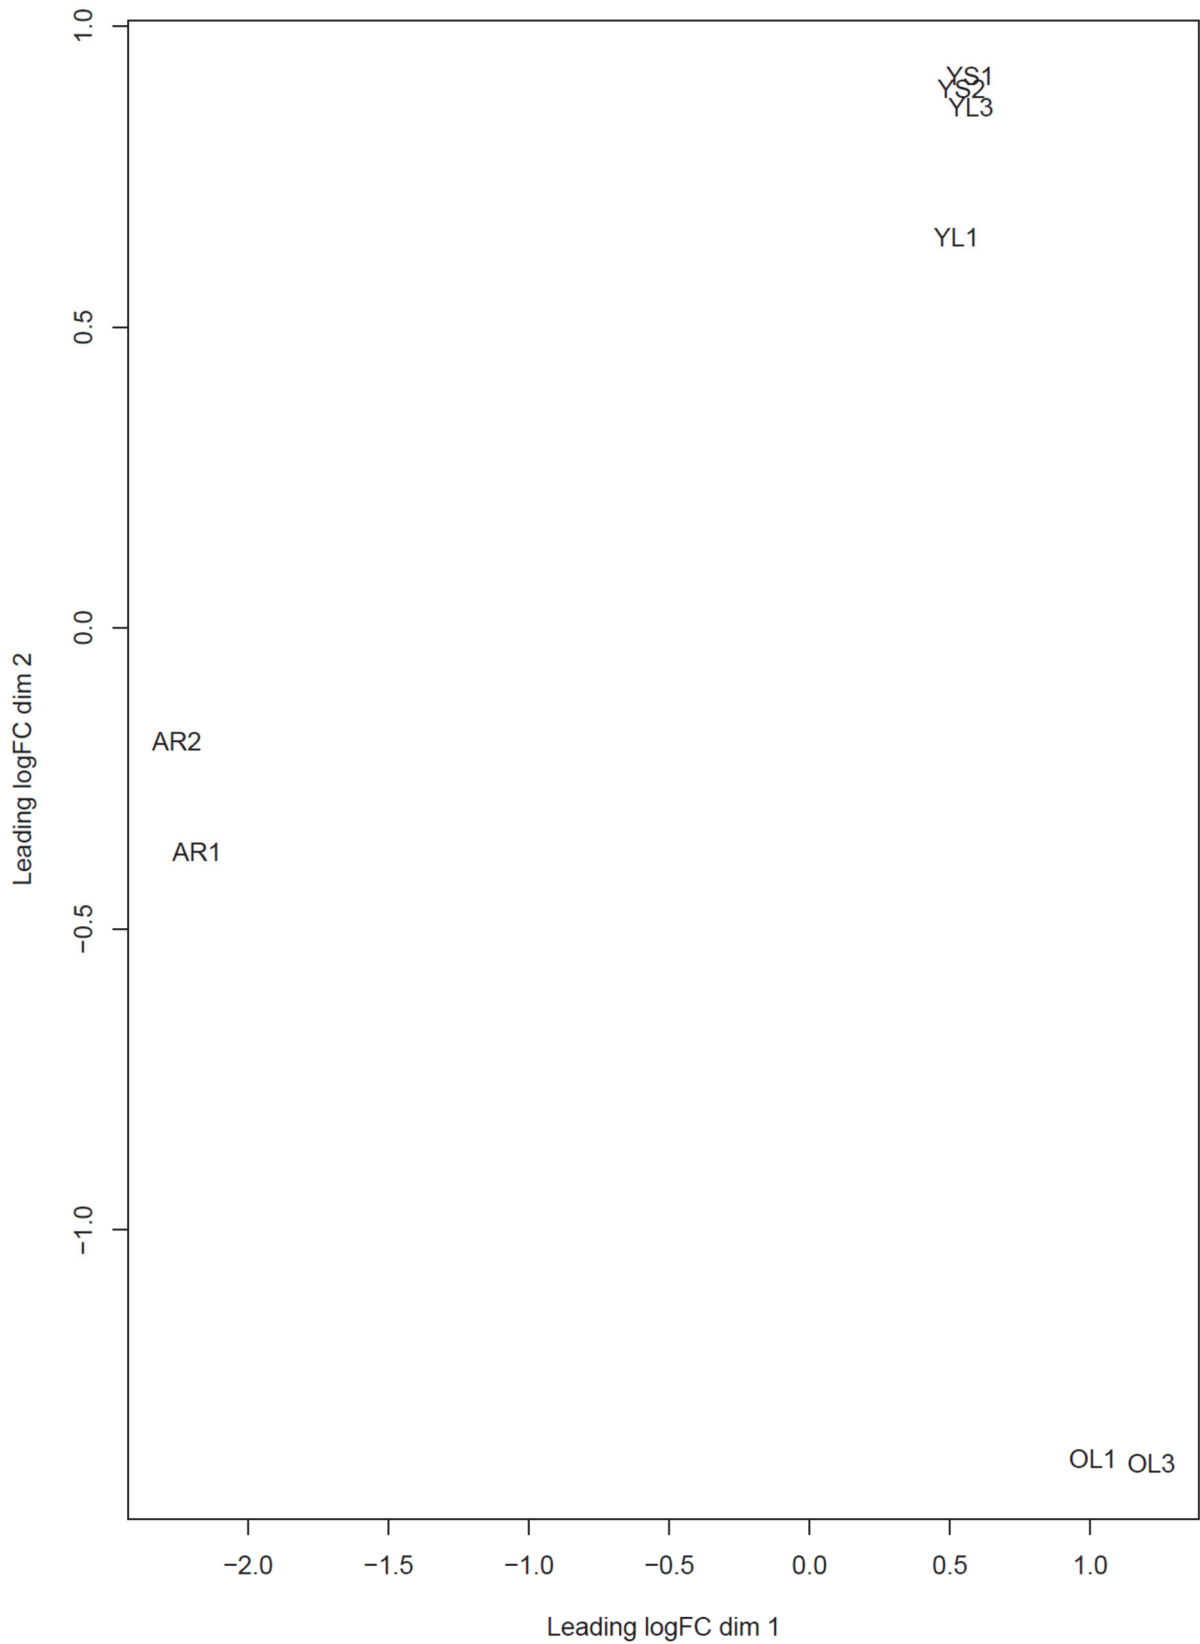

**Figure S1. Multidimensional scaling analysis of the RNA-seq experiments.** Samples are projected on the two first dimensions according to their gene expression profiles. Closeness between samples on the grid indicates a strong similarity.

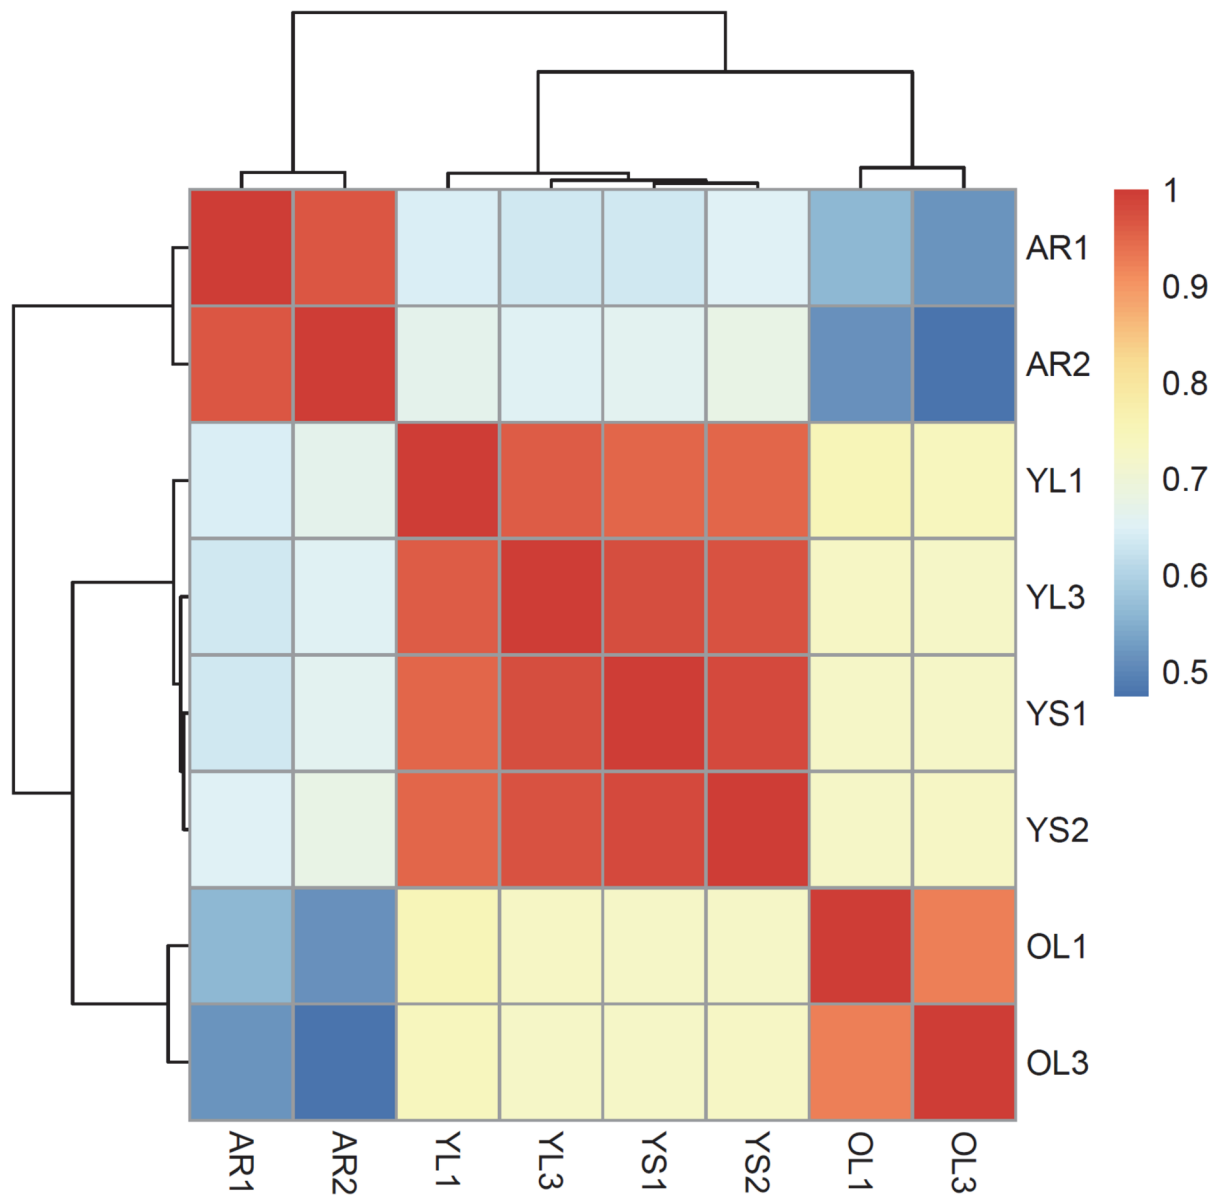

**Figure S2. Similar tissue type are strongly correlated.** Spearman's rho correlation was measured to check biological replicate homogeneity. Higher rho values indicate stronger similarities between pairs of samples.

$-\log_{10}(Pval)$  ● 5 ● 10 ● 15 ● 20

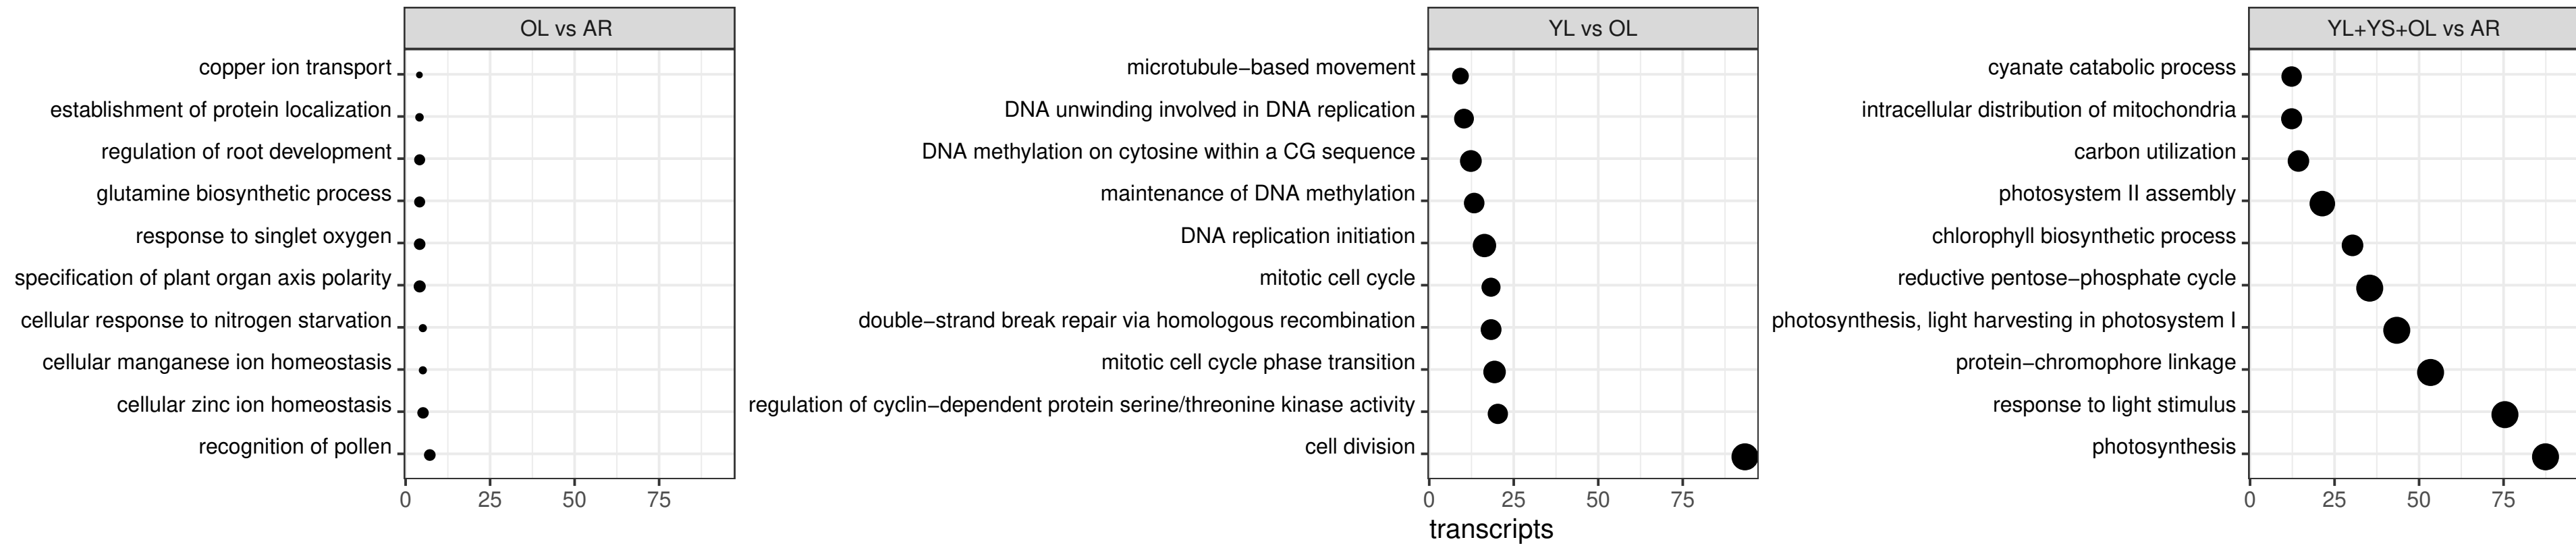

**Figure S3.** DEG with  $\log_{2}FC > 2$  mapped to GO biological pathways that are significantly enriched ( $p < 0.05$ )

$-\log_{10}(Pval)$  • 4 ● 8 ● 12 ● 16 ● 20

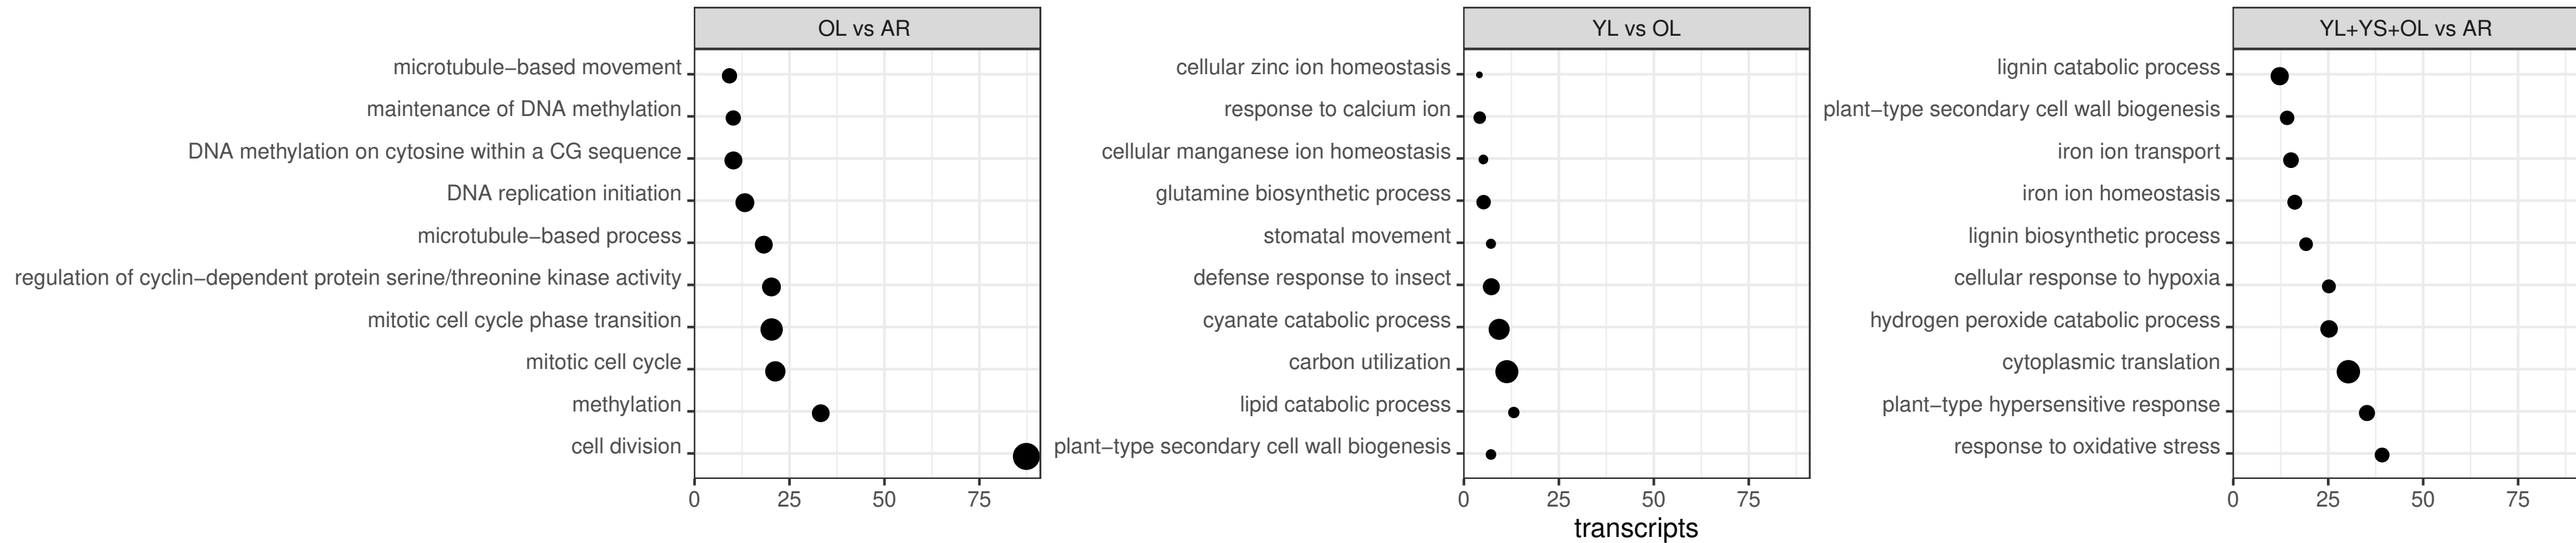

**Figure S4.** DEG with  $\log_{2}FC < 2$  mapped GO biological pathways that are significantly enriched ( $p < 0.05$ ).

YLvsOL 4527 DEG

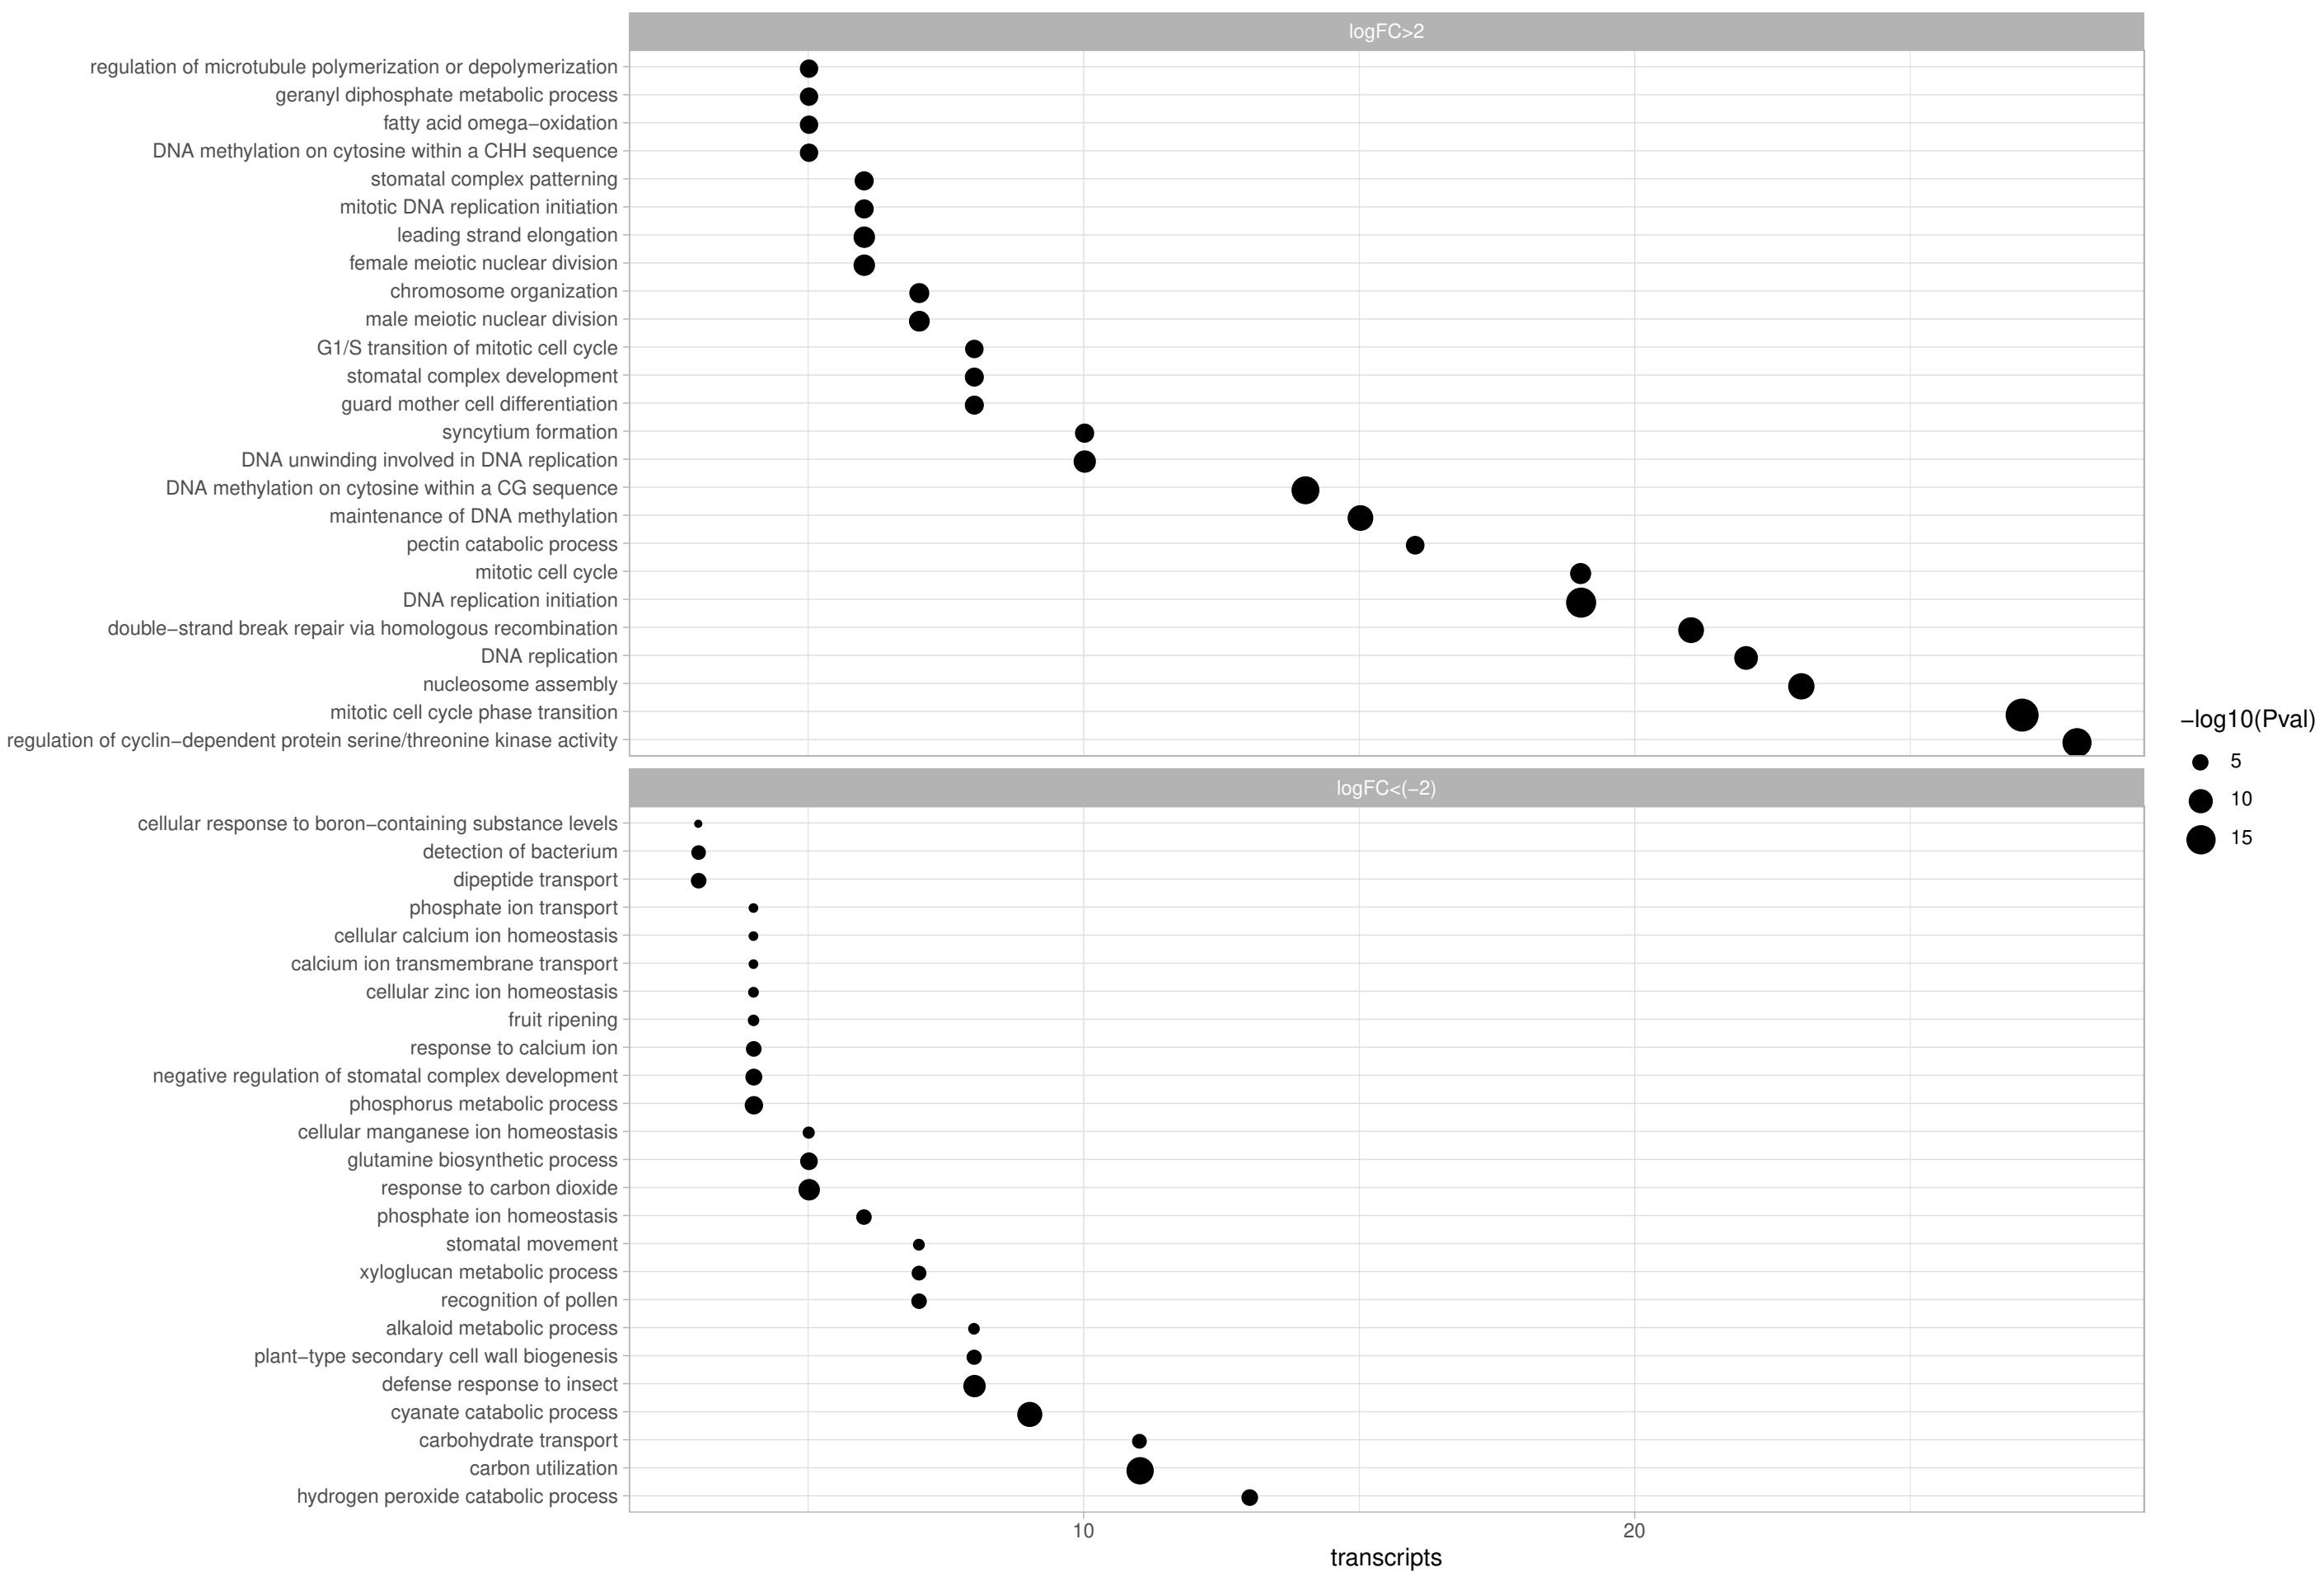

**Figure S5.** Significantly enriched GO biological pathways ( $p < 0.05$ ) in the upregulated (log fold change  $> 2$ ) and downregulated (log fold change  $< -2$ ) YLvsOL DEG comparison.

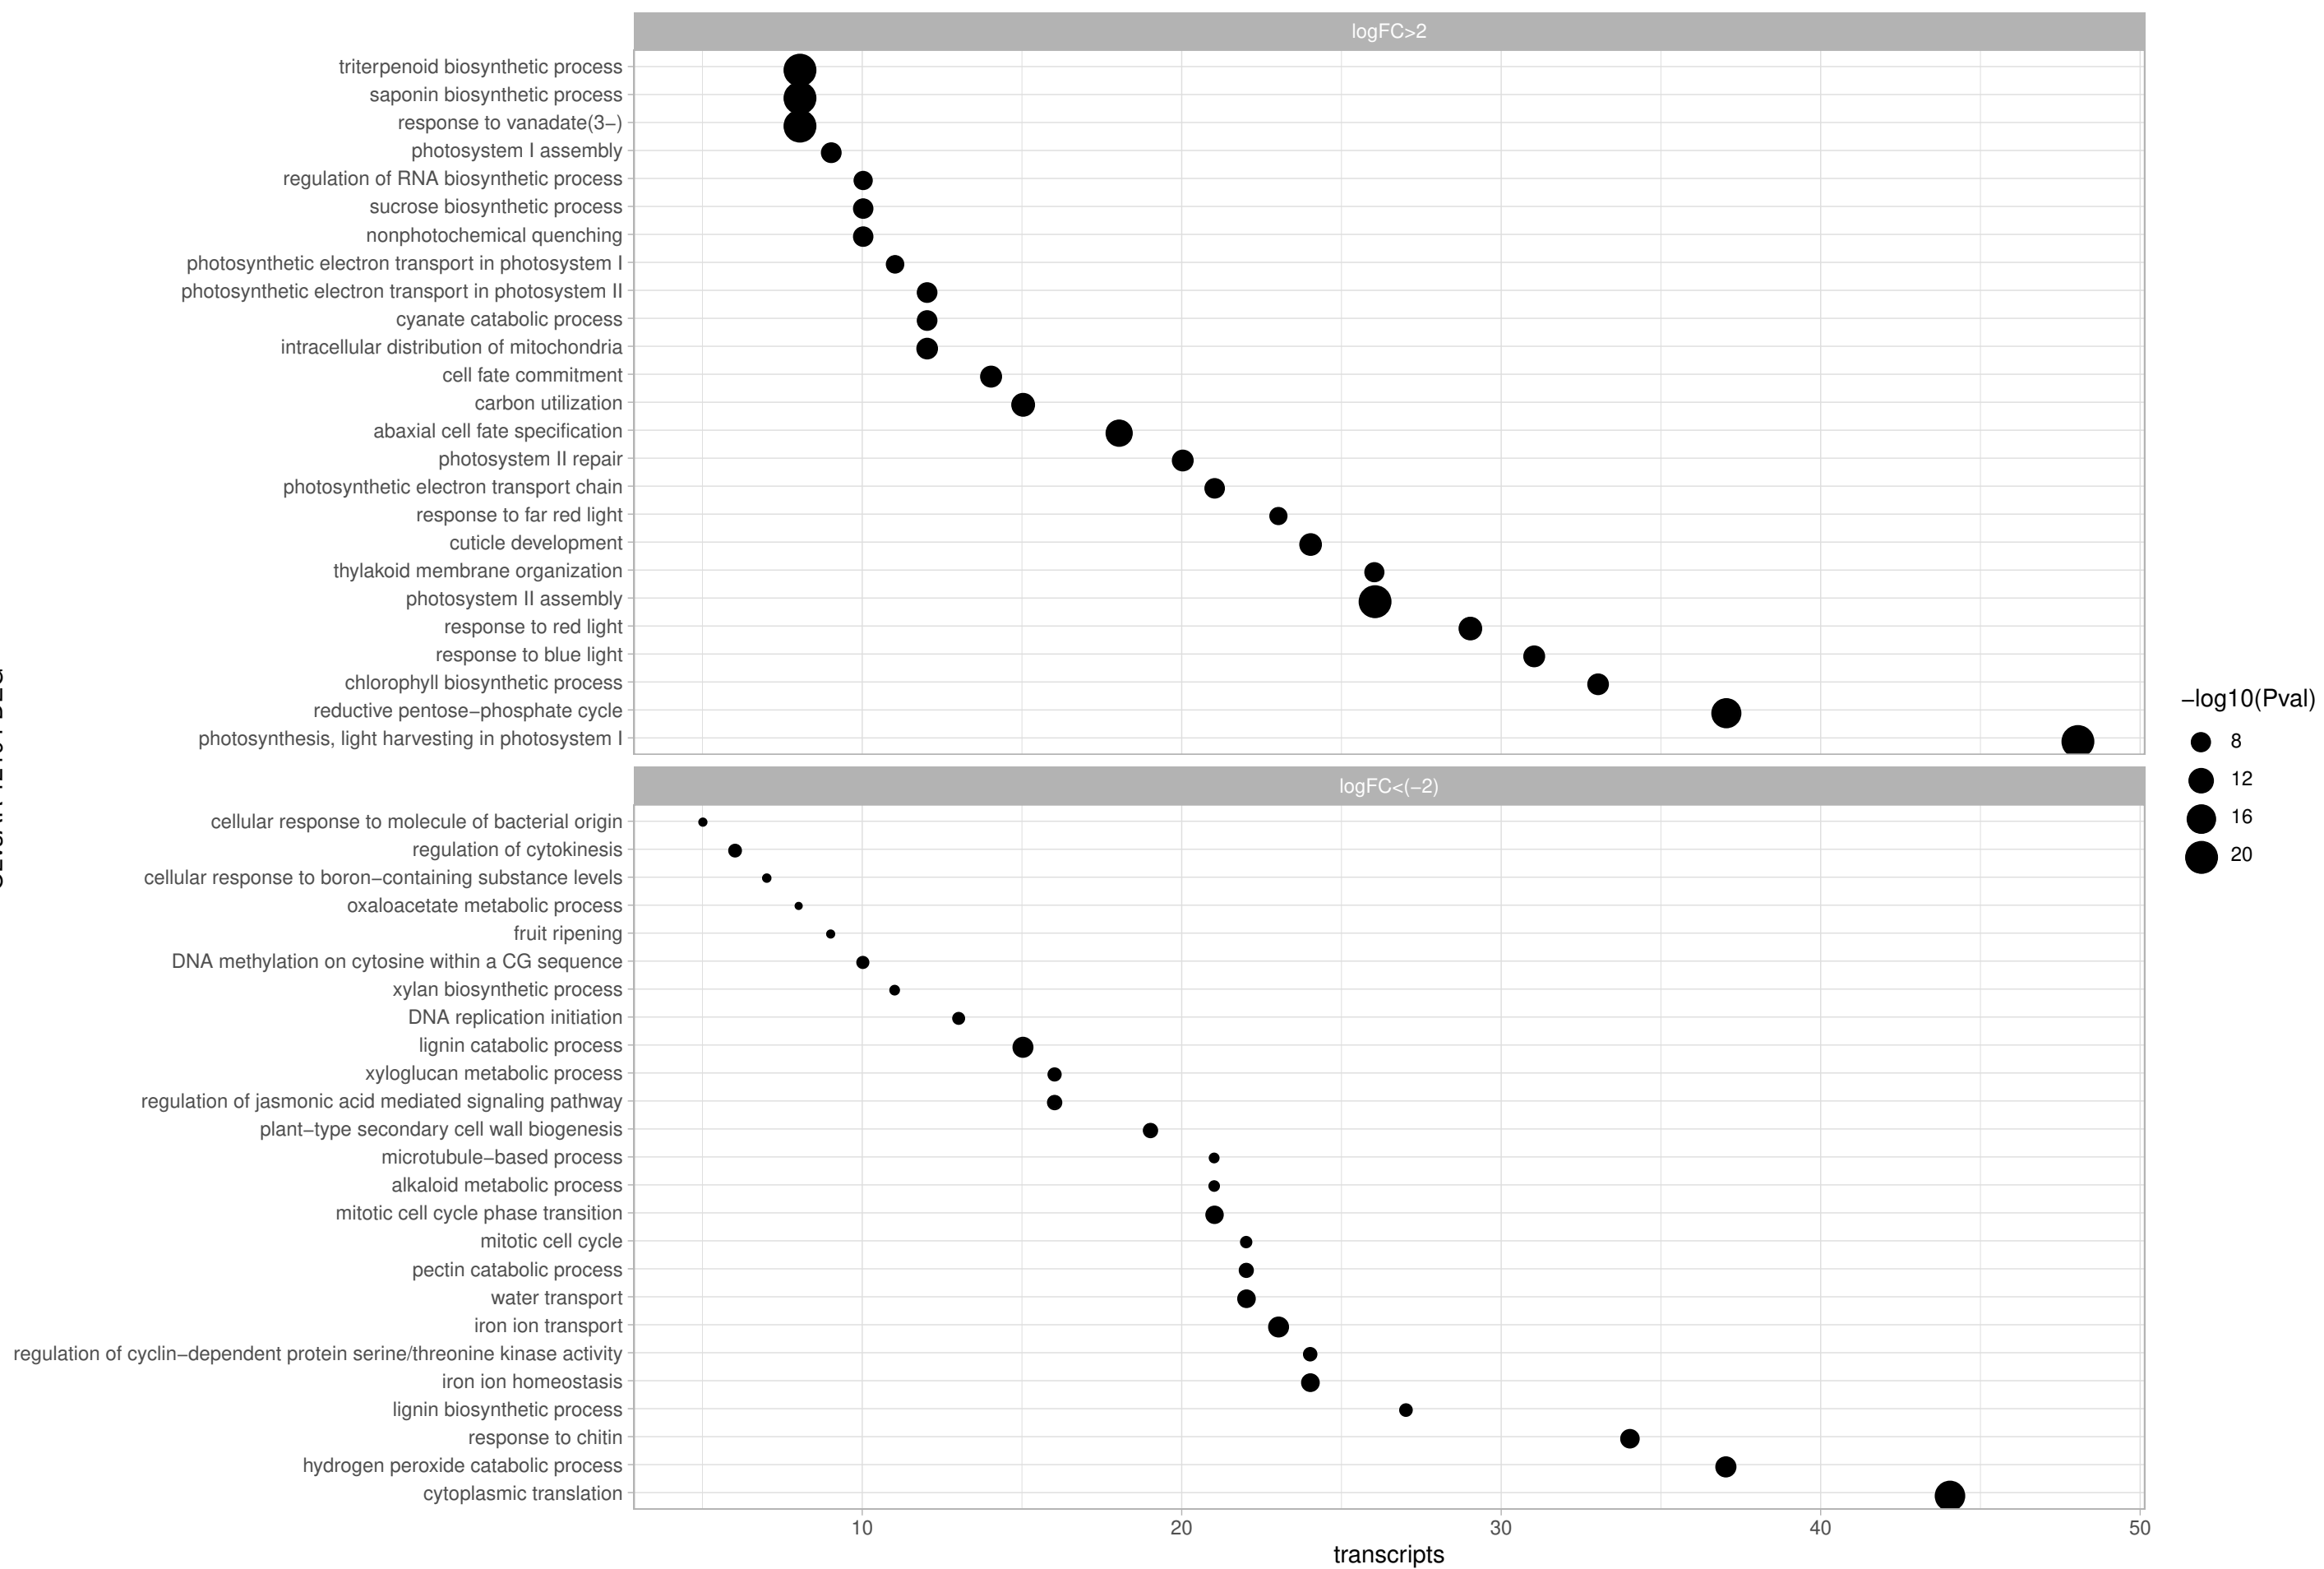

**Figure S6.** Significantly enriched GO biological pathways ( $p < 0.05$ ) in the upregulated ( $\log$  fold change  $> 2$ ) and downregulated ( $\log$  fold change  $< -2$ ) OLvsAR DGE comparison.

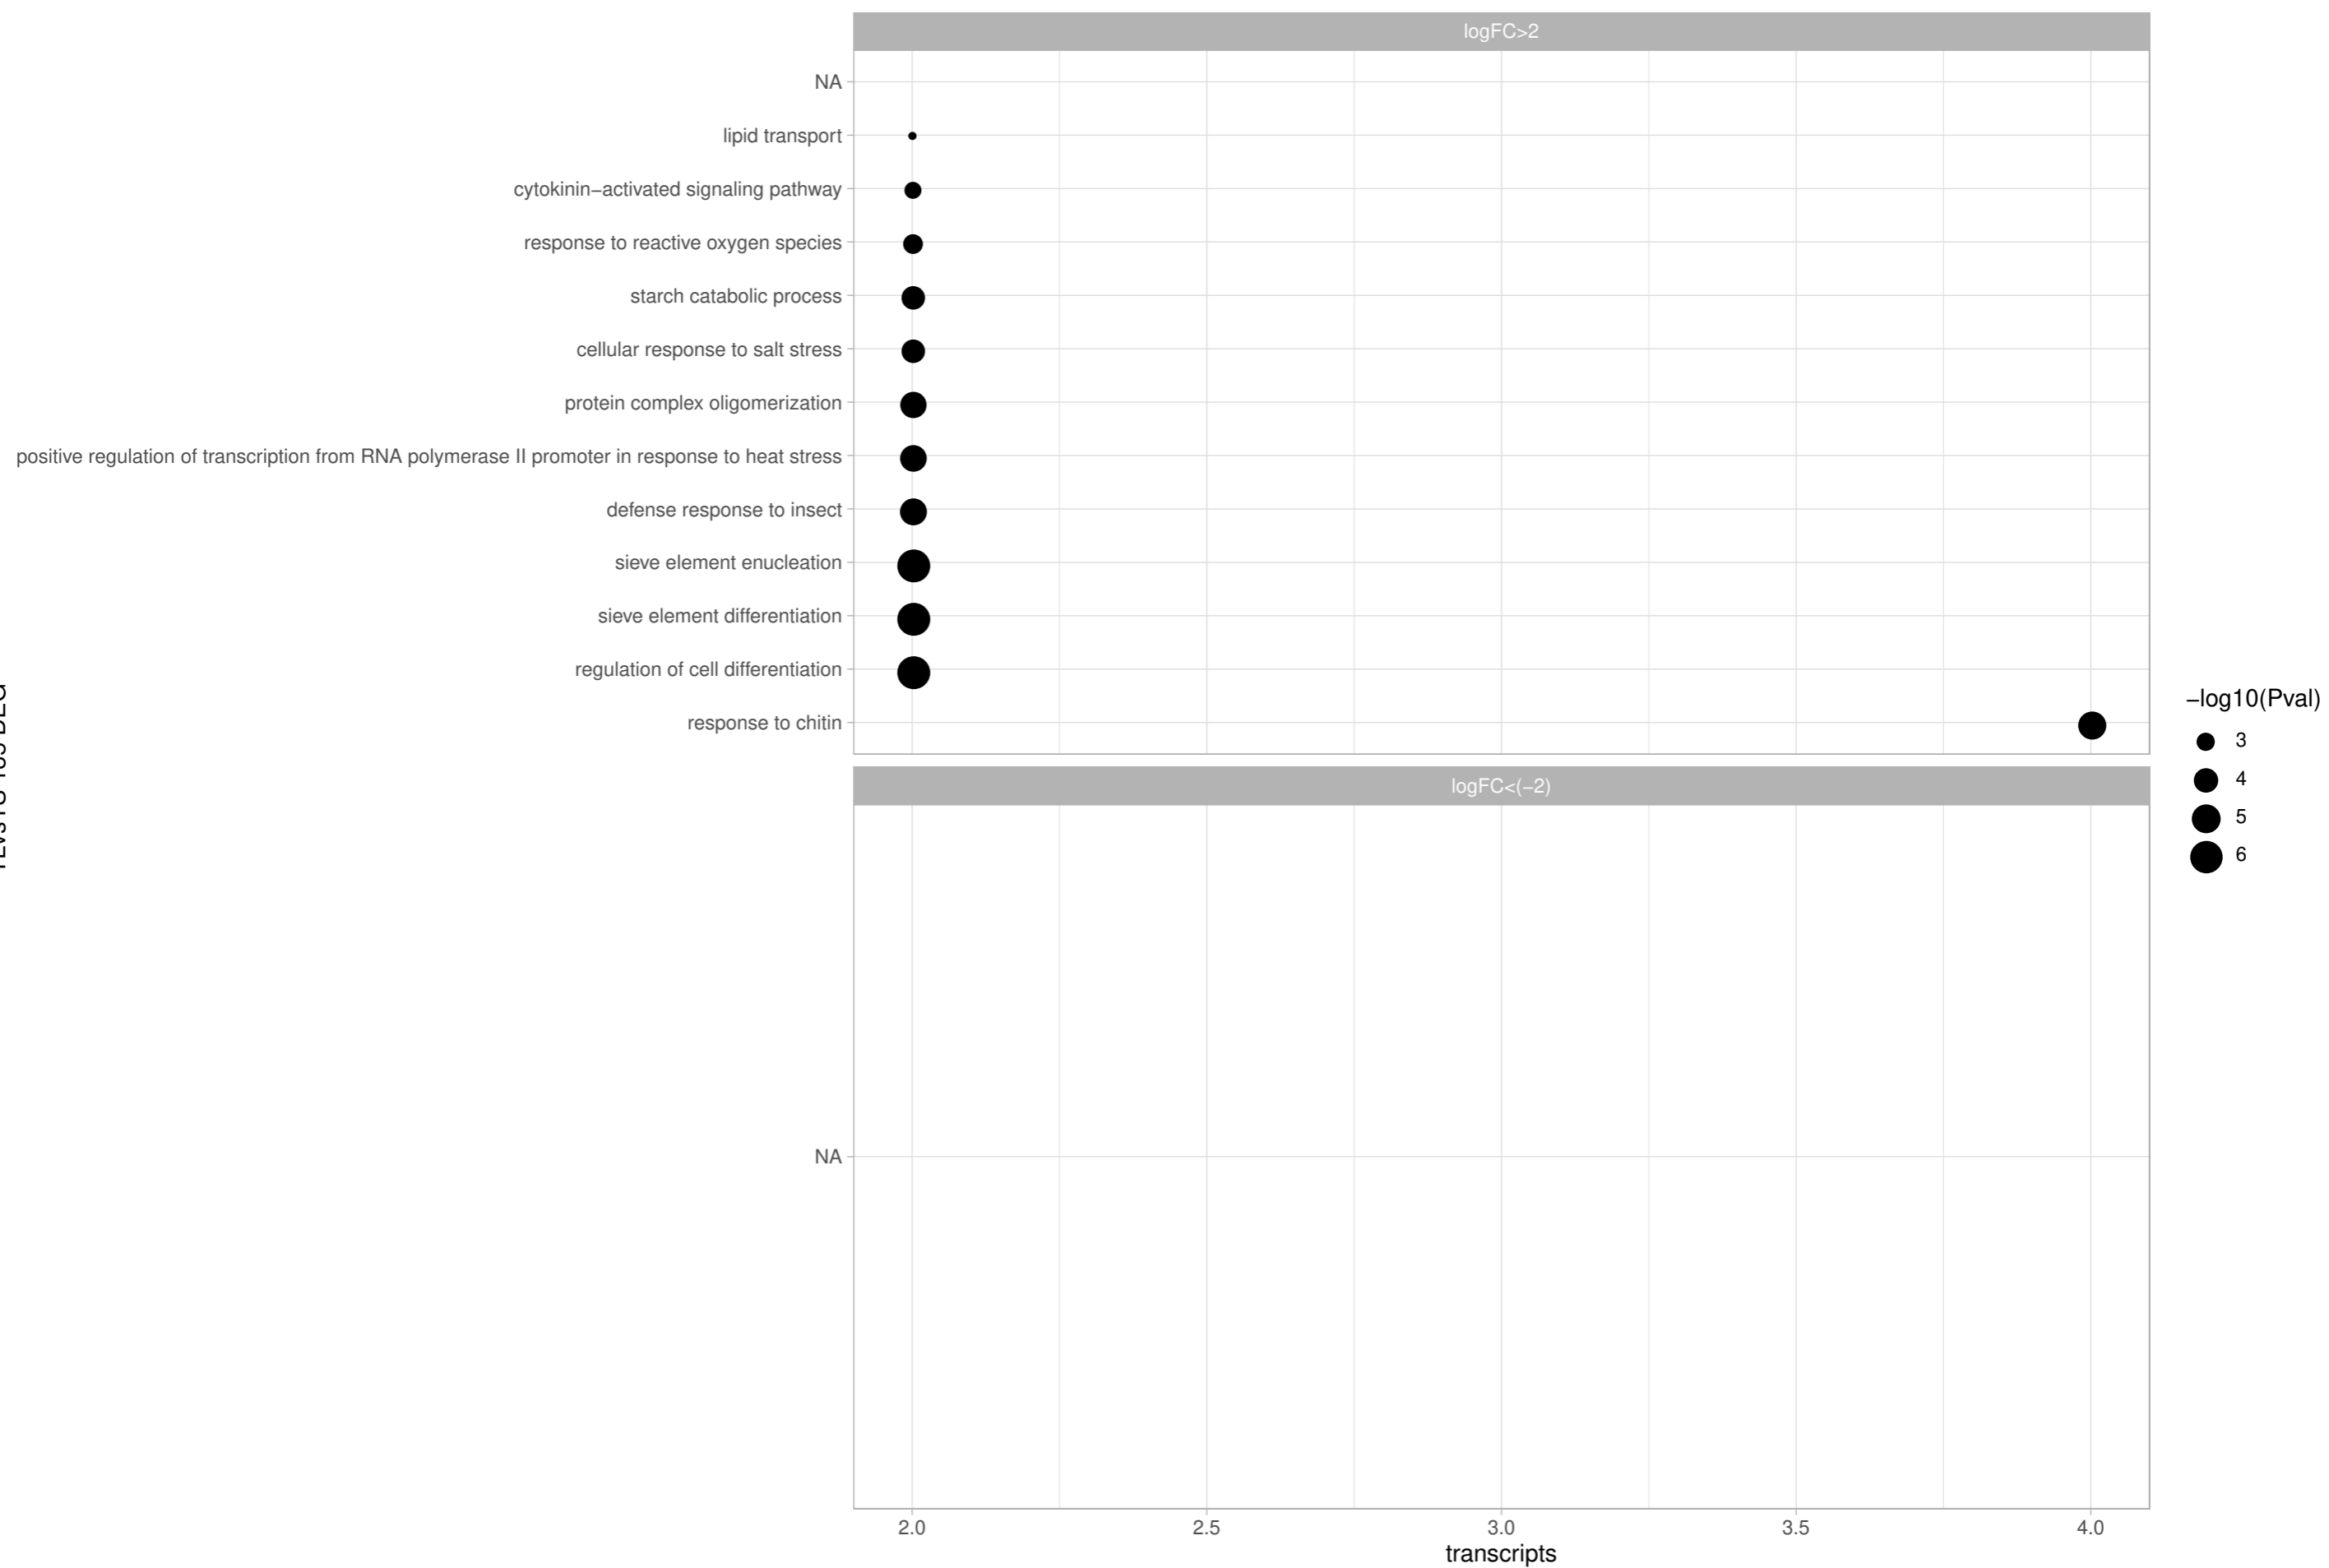

**Figure S7.** Significantly enriched GO biological pathways ( $p < 0.05$ ) in the upregulated (log fold change  $> 2$ ) and downregulated (log fold change  $< -2$ ) YLvsYS DEG comparison.

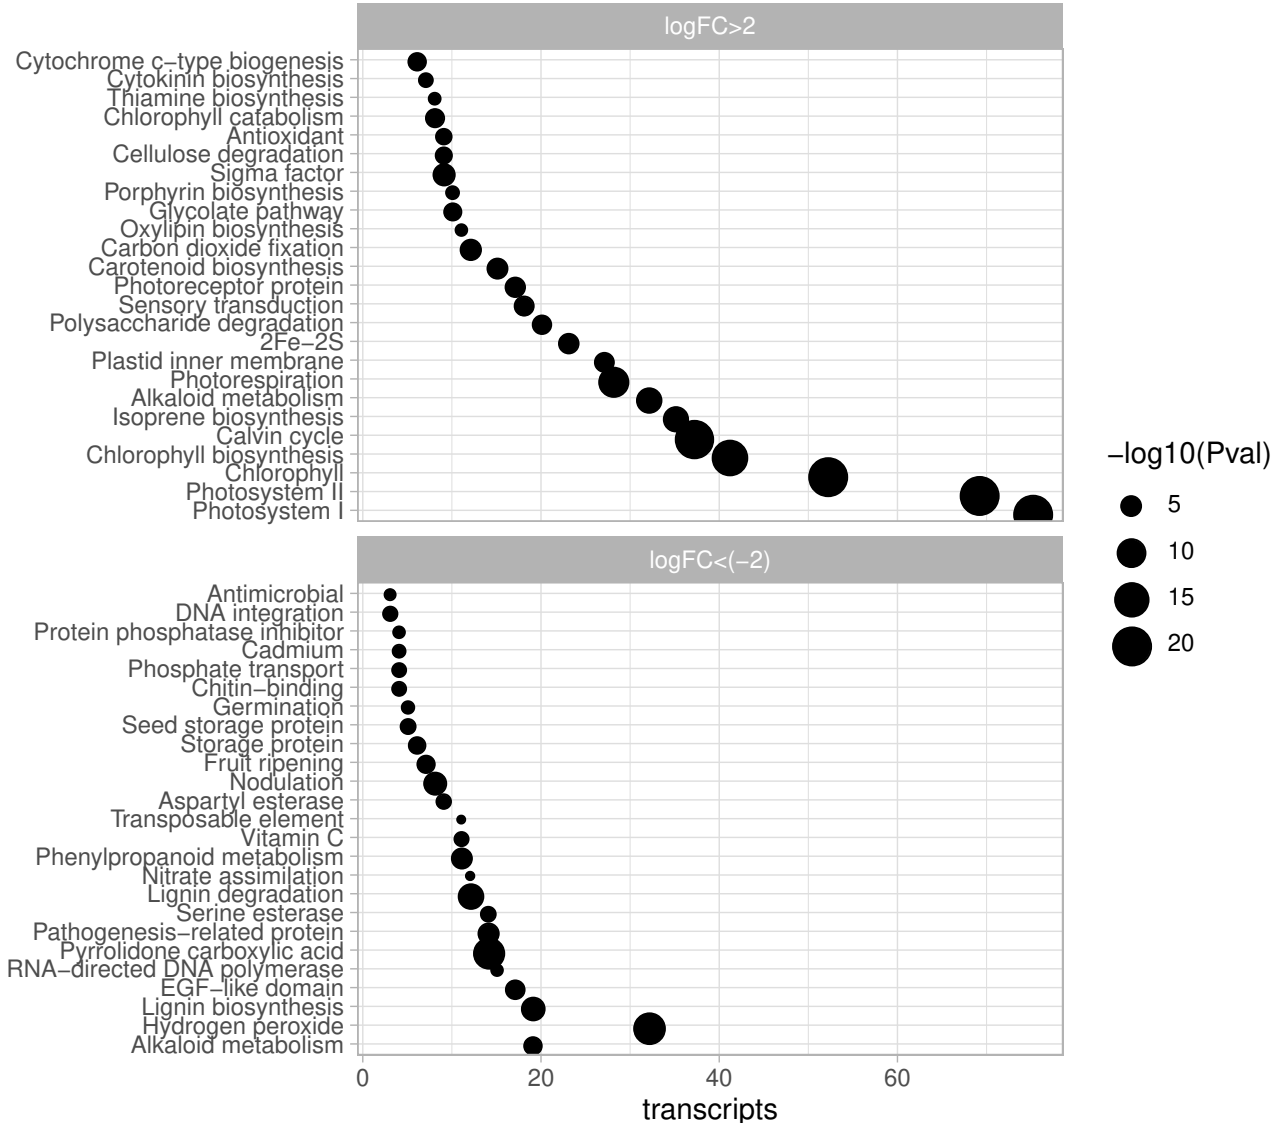

**Figure S8.** Significantly enriched GO biological pathways ( $p < 0.05$ ) in the upregulated (log fold change  $> 2$ ) and downregulated (log fold change  $< 2$ ) YLvsAR



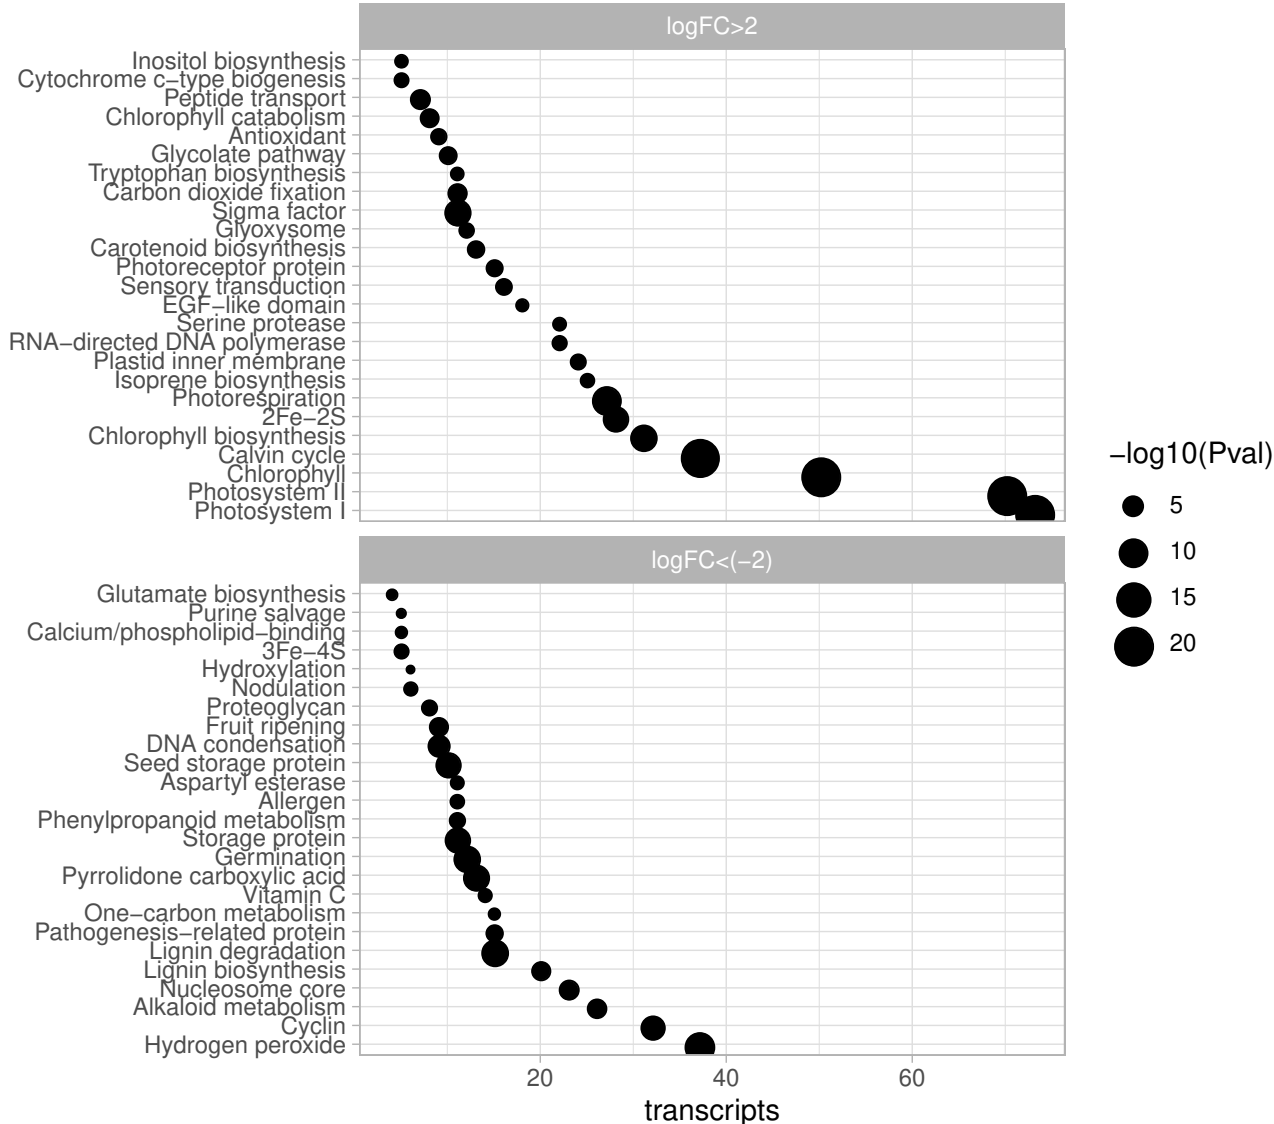

**Figure S9.** Significantly enriched GO Keywords ( $p < 0.05$ ) in the upregulated ( $\log$  fold change  $> 2$ ) and downregulated ( $\log$  fold change  $> 2$ ) OLvsAR DEG comparison.

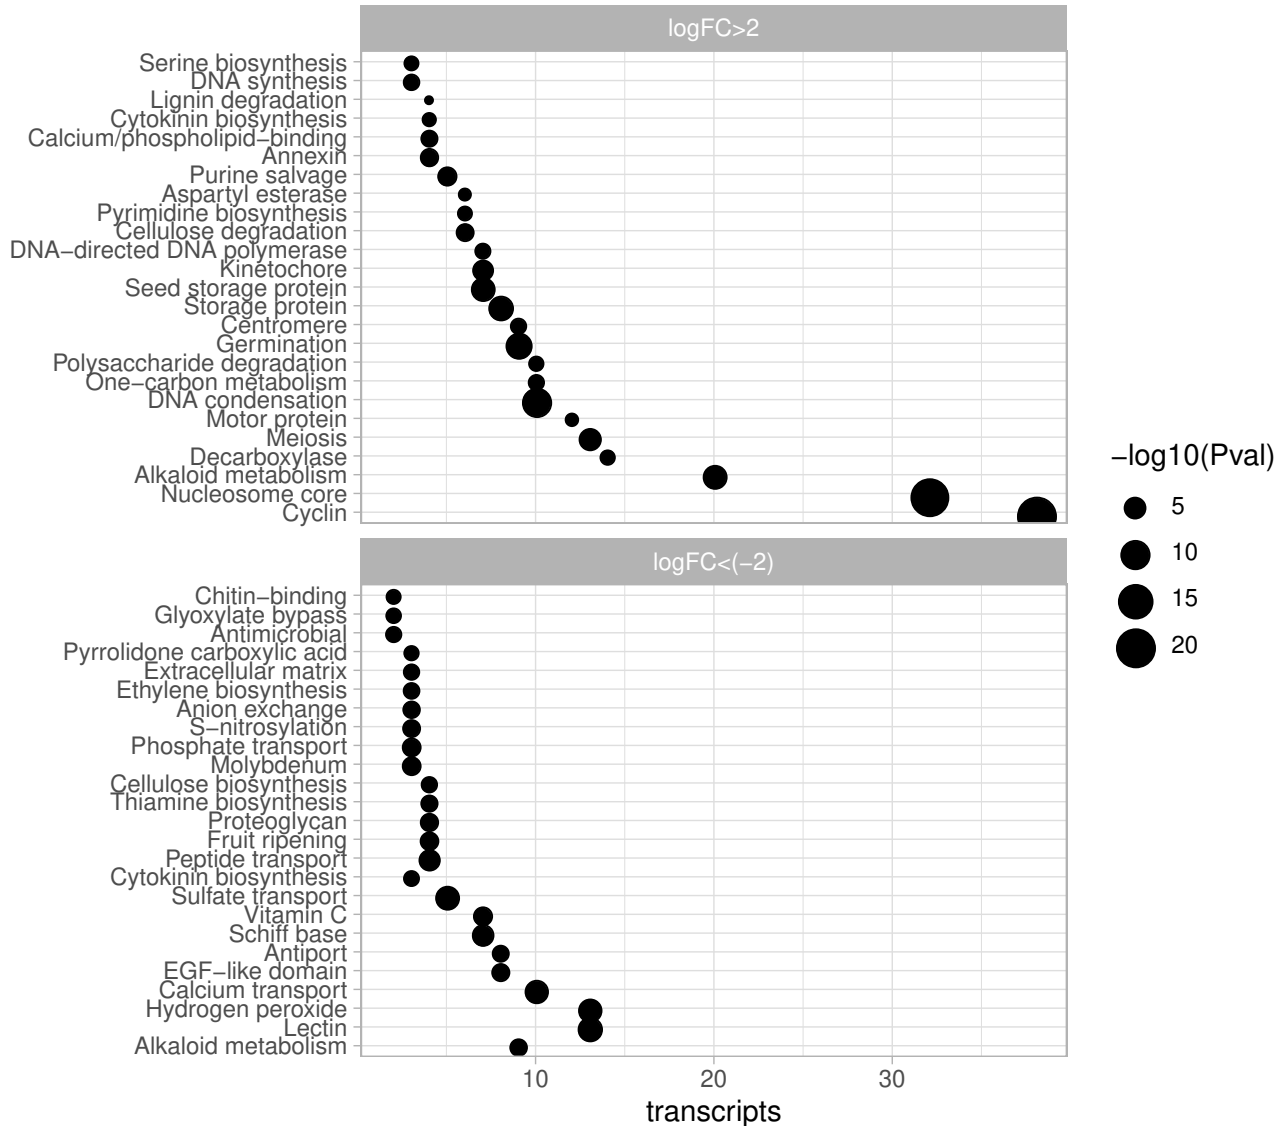

**Figure S10.** Significantly enriched GO Keywords ( $p < 0.05$ ) in the upregulated ( $\log$  fold change  $> 2$ ) and downregulated ( $\log$  fold change  $< -2$ ) YLvsOL DEG comparison.

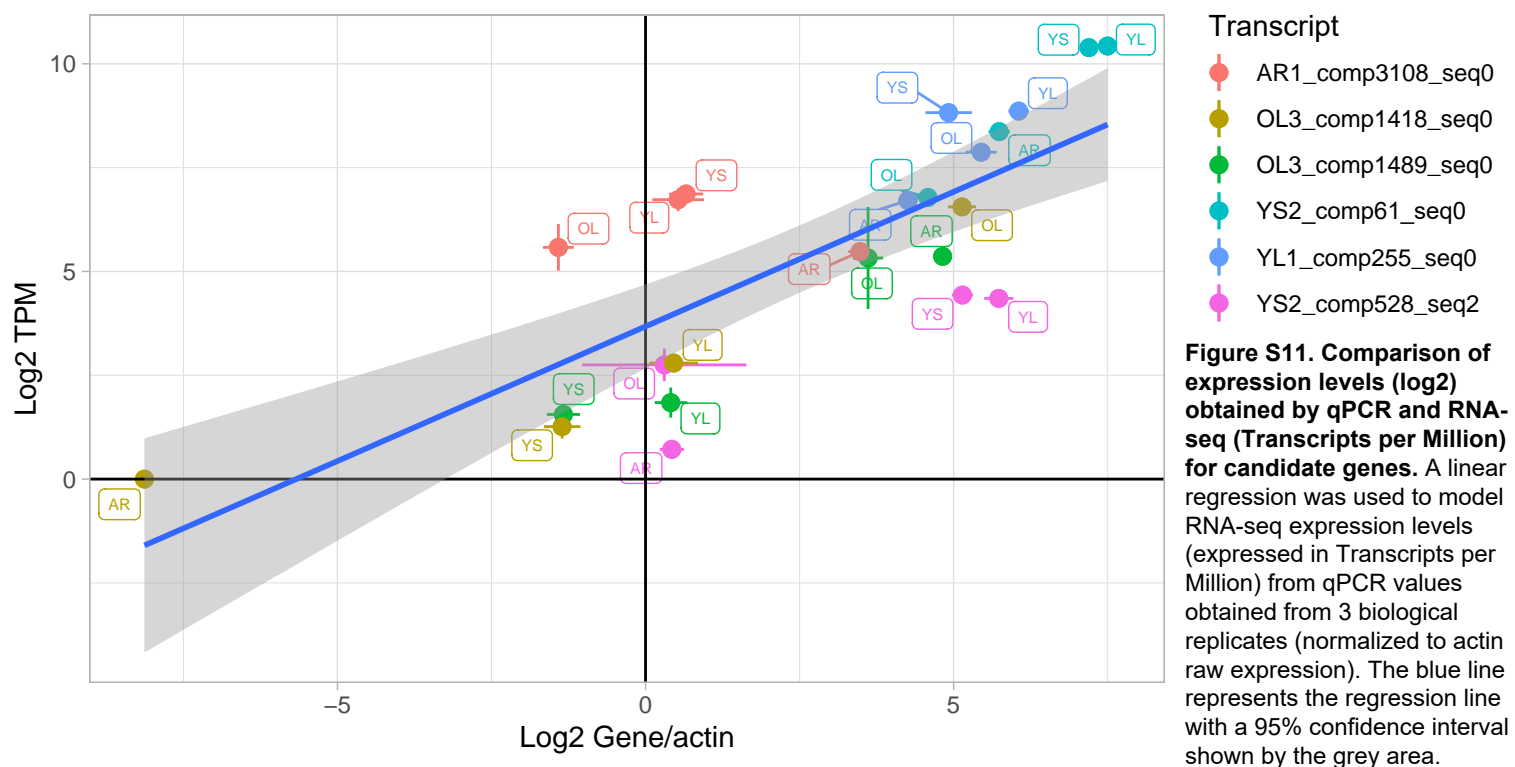

## Dimerization domain

```

Cr16OMT      1 MDVQSEEFRGGAQAQIWSQSCSFITSASSLKCAVKLGIPDTIDNHGKPITLSELTNALVPPV
Vm16OMT     1 MDVQSDEFSKAQAHIWSQVLCHIPTATIKCAIELGIPDAIDNHGKAMTLAELTNSL-PLI
AR_comp35   1 MDVQSEEFRKAQAHIWRHASCLIPTACLICAVELGIADAIHSHGKPMPLSDLTNSL-PS-
AR_comp1185 1 MDVQSEEFRKAQAHIWRHASCLIPTACLICAVELGIADAIHSHGKPMPLSDLTNSL-PS-
YS1_comp1836 1 MDLEASEIIRKQAQAKFLSCSFSSFTSGASSLKCAVOLGIPDAIDNHGKPMSISELTNSL--LI

```

```

Cr16OMT     61 HPSKAPFIYRLMRVLAKNGFCSEEQLDGETEPLYSLTPSSRILLKKEPLNRGLVLTMAD
Vm16OMT     60 NPSKAPFVRRLMRILVKNGFFSEQQITND-HIAYGLTPSSRILLKNEPLNRGLVLANLD
AR_comp35   59 NPSRAPHIHRVMRVLVKDGFFTEEQS----NVYALTPSSRRLLLKNEPLNRGLVLANLD
AR_comp1185 59 NPSRAPHIHRVMRVLVKDGFFTEEQS----NVYALTPSSRRLLLKNEPLNRGLVLPMLE
YS1_comp1836 59 NPSKAPYIHRLMRILVISGYFSEEP----NVYSLNSLSRLLLKNOPLSLRAFAVLYTLE

```

## O-methyltransferase domain

```

Cr16OMT     121 PVQLKAWESLSDWYQNEDDS-STAFETA-HGKNFWGYSSSEHMEHAEFFNEAMASDSQLIS
Vm16OMT     119 PSHMKSWVVALSEWFQNDNEEAKTAFEIAHNGKNFWDYSAEDTEHAEIFNEAMASDSKLVS
AR_comp35   114 PSHMKSWVVALSEWFQNDNEEAKTAFEIAHNGKNFWDYSAEDTEHAEIFNEAMASDSKLVS
AR_comp1185 114 TANVKALDALGRWFQTED---QTSFEIAHDGKTFWDYSVEQTKHAQNEFENNMASDSKFVA
YS1_comp1836 114 IAEMKAWNSLSDWFKNED---PTAFETA-HGKNYWDYCVEDK-LGKGFDEIMATDSSLVS

```

```

Cr16OMT     179 KLL-IGEYKFLFEGLASLVDIGGGTGTIAKAIAKNFPOLKCTVFDLPHVVANLES--KEN
Vm16OMT     179 ELLIINTEYKLLFEGLTSMVDVGGGTGTIAKAIAKTFPNLNCTVFDLPHVVANLES--MGN
AR_comp35   174 ELLIINTEYKLLFEGLTSMVDVGGGTGTIAKAIAKTFPNLNCTVFDLPHVVANLES--MGN
AR_comp1185 171 KL-LTTEYKFLFKGLDSIVDVGGGTGTNAKAIAKAFPYLRCTVFDOPHVVANLES--TEN
YS1_comp1836 169 KLL-IPDYKFLFEGLSSMVDVGGGTGTVAKAIAKSFPSLKCTVFDLPRVVADLKPTTEEN

```

```

Cr16OMT     236 VEFVAGDMFEKIPSANAIFLKWILHDWNDEDCVKILKSCKKAIPA--KGKVIIDMVM-
Vm16OMT     237 LEFVAGDMFVKIPPANAIFLKWILHDWNDEDCVKILKACKKAIPEKEKGKVIVIDTVI-
AR_comp35   232 LEFVAGDMFVKIPPANAIFLKWILHDWNDEDCVKILKACKKAIPEKEKGKVIVIDTVI-
AR_comp1185 228 LEFVGGDMFDRIPSADAIILKIVLHDWNDEDCVKILKNCKSSIPEKEKGKLILIENVM-
YS1_comp1836 228 LEFVAGDMFDKIPPANAIFLKWVLHDWKDEDCVKILKNCKSSIPEKEKGKVIIDTVLM

```

```

Cr16OMT     293 YSDKKDDLVKTQTSMDMAMLVNFAAKERCEKEWAFLFKEAGFSDYKIYPKLDDFTRSLIE
Vm16OMT     296 GSKINDDESIKAQLSMDMGMMVDFASKERDEKEWASLFKEAGFSNYKIFPKLDDFTRSVIE
AR_comp35   291 GSKINDDESIKAQLSMDMGMMVDFASKERDEKEWASLFKEAGFSNYKIFPKLDDFTRSVIE
AR_comp1185 287 FSKKDDNESVKIQMAWDIDMLTLFGAKERTEDEWATLIROAGFSGYKIFPNMDFVRSIIE
YS1_comp1836 288 DSQKHDNELVKTQISSDMDMMVLFCAKERNEKEWAKLFKEAGFSGYKIFPMLDER-CPIE

```

```

Cr16OMT     353 VYP
Vm16OMT     356 VYP
AR_comp35   351 VYP
AR_comp1185 347 VYP
YS1_comp1836 347 VYP

```

**Figure S12.** Alignment of the amino-acid sequences of 16-O-tabersonine methyltransferase candidates. Sequence identity and similarity are highlighted by black and grey shading, respectively. The dimerization domain is highlighted in red and the O-methyltransferase domain is highlighted in blue.

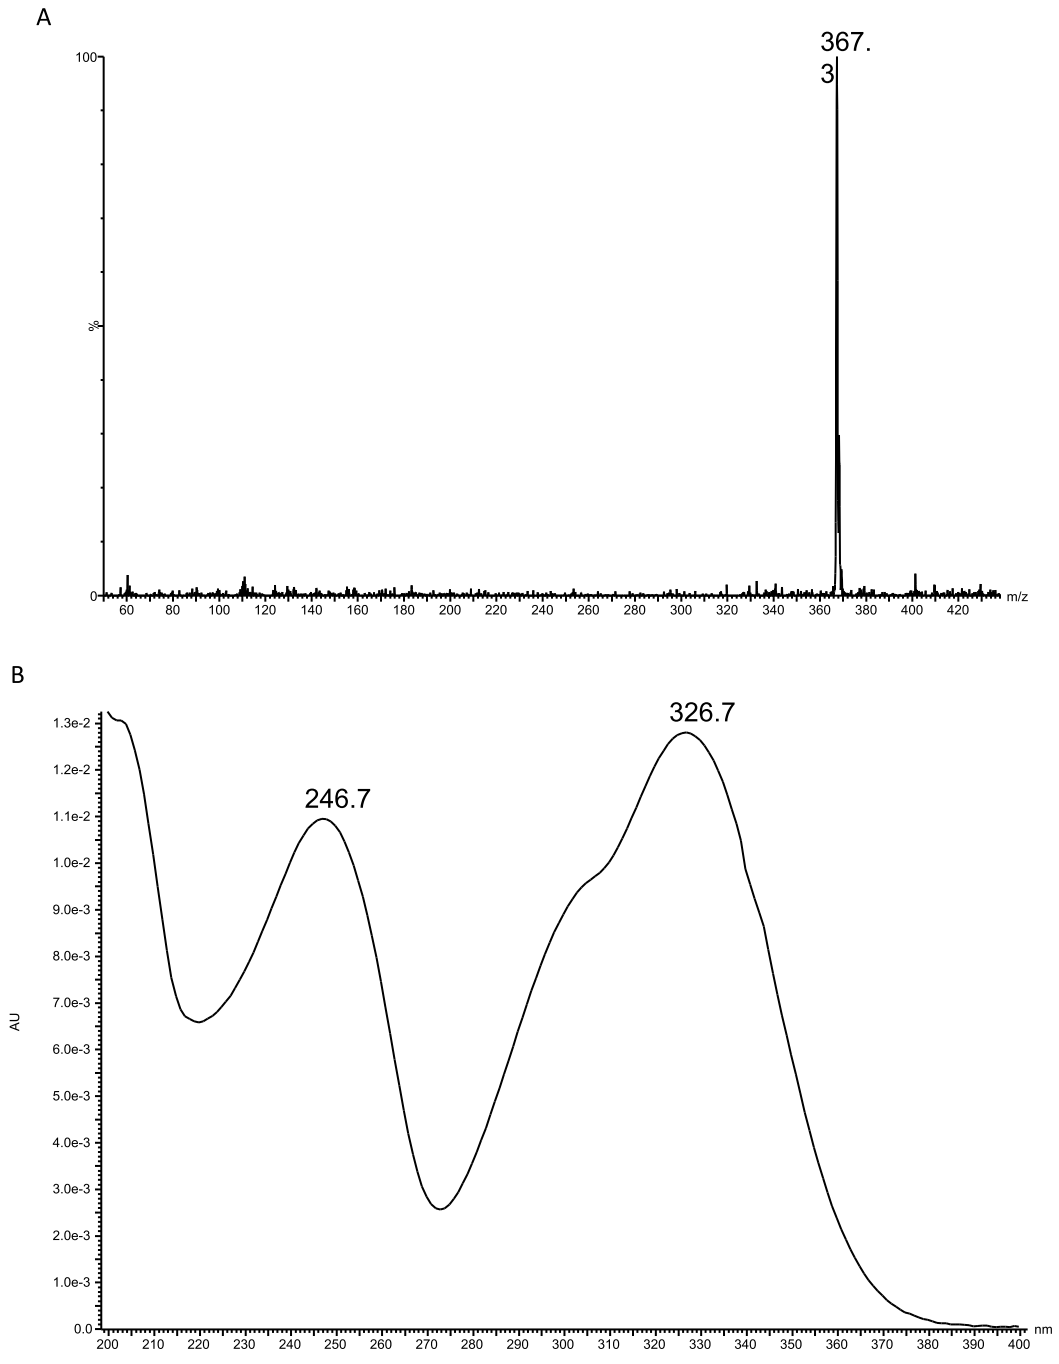

**Figure S13.** UPLC-DAD-MS analysis of 16-methoxytabersonine. (A) MS spectrum and (B) UV spectrum

TableS1

| MIA                                | Transcript                           | % ID   | Alignment length | Mismatch | Gapopen | MIA start | MIA end | Transcript start | Transcript end | E-value   | Bitscore |
|------------------------------------|--------------------------------------|--------|------------------|----------|---------|-----------|---------|------------------|----------------|-----------|----------|
|                                    | YS2_GAGATTCC-ATAGAGGC_comp2127_seq1  | 85.856 | 2326             | 280      | 9       | 132       | 2453    | 273              | 2553           | 0         | 2715     |
|                                    | YL3_CGCTCATT-ATAGAGGC_comp1779_seq8  | 86.735 | 2141             | 244      | 7       | 132       | 2268    | 247              | 2351           | 0         | 2585     |
|                                    | YL3_CGCTCATT-ATAGAGGC_comp1779_seq8  | 81.771 | 192              | 26       | 2       | 2262      | 2453    | 2431             | 2613           | 2.94E-46  | 188      |
|                                    | YL3_CGCTCATT-ATAGAGGC_comp1779_seq5  | 86.933 | 1852             | 199      | 9       | 138       | 1985    | 398              | 2210           | 0         | 2248     |
|                                    | YL3_CGCTCATT-ATAGAGGC_comp1779_seq5  | 85.614 | 285              | 41       | 0       | 1984      | 2268    | 2294             | 2578           | 1.33E-88  | 329      |
|                                    | YL3_CGCTCATT-ATAGAGGC_comp1779_seq5  | 81.771 | 192              | 26       | 2       | 2262      | 2453    | 2658             | 2840           | 2.94E-46  | 188      |
|                                    | AR1_GAGATTCC-CCTATCCT_comp8926_seq1  | 81.237 | 1956             | 367      | 0       | 468       | 2423    | 1115             | 3070           | 0         | 1873     |
|                                    | OL3_CGCTCATT-GGCTCTGA_comp1793_seq1  | 85.478 | 1267             | 144      | 7       | 132       | 1394    | 226              | 1456           | 0         | 1460     |
|                                    | OL3_CGCTCATT-GGCTCTGA_comp1793_seq1  | 87.184 | 593              | 74       | 2       | 1393      | 1985    | 1593             | 2183           | 0         | 720      |
| DXS1 (KC625536.1)                  | OL3_CGCTCATT-GGCTCTGA_comp1793_seq1  | 84.12  | 466              | 65       | 2       | 1984      | 2449    | 2267             | 2723           | 8.38E-142 | 506      |
|                                    | YL1_CGCTCATT-TATAGCCT_comp1491_seq4  | 73.777 | 1922             | 496      | 4       | 444       | 2358    | 295              | 2215           | 0         | 1184     |
|                                    | AR1_GAGATTCC-CCTATCCT_comp8926_seq1  | 72.282 | 1959             | 536      | 6       | 444       | 2397    | 1099             | 3055           | 0         | 1065     |
|                                    | YS2_GAGATTCC-ATAGAGGC_comp2127_seq1  | 71.252 | 1941             | 541      | 14      | 467       | 2397    | 584              | 2517           | 0         | 937      |
|                                    | YS1_GAGATTCC-TATAGCCT_comp16391_seq0 | 74.211 | 1489             | 371      | 7       | 878       | 2358    | 1717             | 3200           | 0         | 935      |
|                                    | YL1_CGCTCATT-TATAGCCT_comp3571_seq0  | 84.672 | 822              | 126      | 0       | 871       | 1692    | 1                | 822            | 0         | 915      |
|                                    | YL1_CGCTCATT-TATAGCCT_comp3571_seq0  | 87.847 | 288              | 35       | 0       | 1970      | 2257    | 2335             | 2622           | 2.21E-98  | 361      |
|                                    | YL1_CGCTCATT-TATAGCCT_comp3571_seq0  | 87.943 | 282              | 34       | 0       | 1684      | 1965    | 1564             | 1845           | 9.42E-97  | 356      |
| DXS2 (DQ848672.1)                  | YL1_CGCTCATT-TATAGCCT_comp3571_seq0  | 86.792 | 159              | 21       | 0       | 2256      | 2414    | 3195             | 3353           | 2.37E-47  | 192      |
|                                    | YL1_CGCTCATT-TATAGCCT_comp1491_seq4  | 87.967 | 2169             | 243      | 5       | 32        | 2185    | 94               | 2259           | 0         | 2729     |
|                                    | YS1_GAGATTCC-TATAGCCT_comp16391_seq0 | 88.066 | 1525             | 182      | 0       | 661       | 2185    | 1720             | 3244           | 0         | 1930     |
|                                    | AR1_GAGATTCC-CCTATCCT_comp8926_seq1  | 77.923 | 1993             | 430      | 4       | 127       | 2114    | 1002             | 2989           | 0         | 1602     |
|                                    | YS2_GAGATTCC-ATAGAGGC_comp2127_seq1  | 70.629 | 1859             | 540      | 4       | 259       | 2114    | 596              | 2451           | 0         | 879      |
|                                    | YS2_GAGATTCC-ATAGAGGC_comp28794_seq0 | 85.752 | 751              | 92       | 4       | 34        | 772     | 50               | 797            | 0         | 868      |
|                                    | YS1_GAGATTCC-TATAGCCT_comp445_seq2   | 88.005 | 1634             | 157      | 14      | 1         | 1613    | 352              | 1967           | 0         | 2037     |
|                                    | YL3_CGCTCATT-ATAGAGGC_comp492_seq0   | 87.636 | 1561             | 155      | 14      | 96        | 1629    | 728              | 2277           | 0         | 1918     |
|                                    | YL3_CGCTCATT-ATAGAGGC_comp492_seq0   | 90.816 | 98               | 9        | 0       | 1         | 98      | 300              | 397            | 1.00E-30  | 136      |
|                                    | YL1_CGCTCATT-TATAGCCT_comp16369_seq2 | 87.627 | 1382             | 133      | 14      | 275       | 1629    | 849              | 2219           | 0         | 1694     |
| YL3_CGCTCATT-ATAGAGGC_comp434_seq2 | 92.004                               | 1113   | 86               | 1        | 1       | 1110      | 213     | 1325             | 0              | 1606      |          |
| YL3_CGCTCATT-ATAGAGGC_comp434_seq2 | 79.89                                | 547    | 72               | 14       | 1110    | 1629      | 1472    | 2007             | 5.51E-129      | 462       |          |
|                                    | YS1_GAGATTCC-TATAGCCT_comp445_seq3   | 91.982 | 1110             | 89       | 0       | 1         | 1110    | 352              | 1461           | 0         | 1602     |
|                                    | YS1_GAGATTCC-TATAGCCT_comp445_seq3   | 75.75  | 400              | 59       | 14      | 1257      | 1629    | 1892             | 2280           | 1.48E-66  | 255      |
|                                    | YS1_GAGATTCC-TATAGCCT_comp445_seq3   | 91.156 | 147              | 13       | 0       | 1110      | 1256    | 1620             | 1766           | 6.74E-52  | 206      |
|                                    | YS2_GAGATTCC-ATAGAGGC_comp2915_seq1  | 84.587 | 1077             | 120      | 13      | 38        | 1075    | 1351             | 2420           | 0         | 1177     |
|                                    | YL1_CGCTCATT-TATAGCCT_comp25159_seq0 | 74.118 | 85               | 10       | 2       | 949       | 1024    | 1                | 82             | 6.35E-07  | 57.2     |
|                                    | YS2_GAGATTCC-ATAGAGGC_comp22987_seq0 | 95.652 | 23               | 1        | 0       | 384       | 406     | 1                | 23             | 0.6       | 37.4     |
|                                    | OL1_CGCTCATT-CCTATCCT_comp6333_seq2  | 89.286 | 28               | 3        | 0       | 662       | 689     | 477              | 450            | 0.6       | 37.4     |
|                                    | AR2_GAGATTCC-GGCTCTGA_comp22244_seq0 | 92.593 | 27               | 0        | 1       | 1336      | 1362    | 25               | 1              | 0.6       | 37.4     |
|                                    | YS1_GAGATTCC-TATAGCCT_comp1496_seq2  | 84.572 | 1426             | 186      | 12      | 90        | 1504    | 245              | 1647           | 0         | 1557     |
|                                    | AR1_GAGATTCC-CCTATCCT_comp2159_seq1  | 84.561 | 1425             | 187      | 12      | 90        | 1504    | 281              | 1682           | 0         | 1553     |
|                                    | YL3_CGCTCATT-ATAGAGGC_comp1768_seq0  | 88.545 | 969              | 111      | 0       | 90        | 1058    | 234              | 1202           | 0         | 1247     |
|                                    | YL3_CGCTCATT-ATAGAGGC_comp1768_seq0  | 88.136 | 59               | 7        | 0       | 1227      | 1285    | 1719             | 1777           | 2.99E-12  | 75.2     |

TableS1

|                   |                                      |        |      |     |    |      |      |      |      |           |      |
|-------------------|--------------------------------------|--------|------|-----|----|------|------|------|------|-----------|------|
| CMK (DQ848671.1)  | YL3_CGCTCATT-ATAGAGGC_comp1768_seq0  | 85.417 | 48   | 7   | 0  | 1169 | 1216 | 1199 | 1246 | 2.80E-06  | 55.4 |
|                   | AR1_GAGATTCC-CCTATCCT_comp2159_seq2  | 92.323 | 495  | 38  | 0  | 638  | 1132 | 941  | 1435 | 0         | 722  |
|                   | AR1_GAGATTCC-CCTATCCT_comp2159_seq2  | 85.278 | 557  | 82  | 0  | 90   | 646  | 281  | 837  | 0         | 636  |
|                   | AR1_GAGATTCC-CCTATCCT_comp2159_seq2  | 73.438 | 384  | 69  | 12 | 1131 | 1504 | 1675 | 2035 | 2.01E-52  | 208  |
|                   | YL3_CGCTCATT-ATAGAGGC_comp18_seq9    | 76.907 | 485  | 78  | 12 | 1031 | 1504 | 1869 | 2330 | 3.18E-94  | 347  |
|                   | YS1_GAGATTCC-TATAGCCT_comp2048_seq1  | 85.405 | 740  | 78  | 7  | 1    | 719  | 179  | 909  | 0         | 843  |
|                   | AR2_GAGATTCC-GGCTCTGA_comp29267_seq0 | 92.722 | 371  | 27  | 0  | 346  | 716  | 1002 | 1372 | 9.27E-155 | 547  |
|                   | YL3_CGCTCATT-ATAGAGGC_comp2559_seq2  | 82.318 | 509  | 60  | 7  | 1    | 488  | 87   | 586  | 8.13E-143 | 508  |
|                   | YL3_CGCTCATT-ATAGAGGC_comp2559_seq2  | 90.431 | 209  | 20  | 0  | 478  | 686  | 1498 | 1706 | 1.38E-76  | 288  |
| MECS (AF250236.1) | AR2_GAGATTCC-GGCTCTGA_comp5554_seq2  | 85.676 | 377  | 42  | 3  | 124  | 488  | 197  | 573  | 1.47E-120 | 434  |
|                   | AR2_GAGATTCC-GGCTCTGA_comp5554_seq2  | 92.975 | 242  | 17  | 0  | 478  | 719  | 1539 | 1780 | 2.66E-98  | 360  |
|                   | AR2_GAGATTCC-GGCTCTGA_comp5554_seq2  | 87.805 | 41   | 5   | 0  | 1    | 41   | 89   | 129  | 1.80E-05  | 51.8 |
|                   | AR1_GAGATTCC-CCTATCCT_comp4429_seq6  | 81.579 | 38   | 7   | 0  | 845  | 882  | 202  | 165  | 0.4       | 37.4 |
|                   | YS2_GAGATTCC-ATAGAGGC_comp287_seq1   | 89.876 | 2331 | 220 | 6  | 42   | 2364 | 139  | 2461 | 0         | 3128 |
|                   | AR1_GAGATTCC-CCTATCCT_comp972_seq1   | 89.79  | 2331 | 222 | 6  | 42   | 2364 | 135  | 2457 | 0         | 3119 |
|                   | AR1_GAGATTCC-CCTATCCT_comp972_seq2   | 89.79  | 2331 | 222 | 6  | 42   | 2364 | 135  | 2457 | 0         | 3119 |
|                   | AR1_GAGATTCC-CCTATCCT_comp972_seq6   | 89.79  | 2331 | 222 | 6  | 42   | 2364 | 135  | 2457 | 0         | 3119 |
|                   | OL1_CGCTCATT-CCTATCCT_comp301_seq2   | 90.707 | 2249 | 209 | 0  | 116  | 2364 | 398  | 2646 | 0         | 3113 |
| HDS (AY184810.2)  | OL1_CGCTCATT-CCTATCCT_comp301_seq2   | 92.308 | 26   | 2   | 0  | 52   | 77   | 206  | 231  | 0.3       | 39.2 |
|                   | YS1_GAGATTCC-TATAGCCT_comp439_seq2   | 88.865 | 1419 | 122 | 3  | 1    | 1392 | 147  | 1556 | 0         | 1865 |
|                   | AR2_GAGATTCC-GGCTCTGA_comp1917_seq2  | 89.177 | 1349 | 113 | 2  | 1    | 1325 | 88   | 1427 | 0         | 1795 |
|                   | AR2_GAGATTCC-GGCTCTGA_comp1917_seq2  | 86.486 | 74   | 7   | 1  | 1322 | 1392 | 1580 | 1653 | 3.82E-16  | 87.8 |
|                   | YS1_GAGATTCC-TATAGCCT_comp439_seq0   | 92.056 | 1133 | 87  | 1  | 263  | 1392 | 882  | 2014 | 0         | 1636 |
|                   | YS1_GAGATTCC-TATAGCCT_comp439_seq0   | 79.508 | 244  | 33  | 5  | 40   | 267  | 3    | 245  | 1.62E-52  | 208  |
|                   | OL3_CGCTCATT-GGCTCTGA_comp26094_seq0 | 91.56  | 936  | 76  | 1  | 460  | 1392 | 934  | 1869 | 0         | 1330 |
|                   | OL3_CGCTCATT-GGCTCTGA_comp26094_seq0 | 93.939 | 198  | 12  | 0  | 265  | 462  | 3    | 200  | 2.74E-81  | 304  |
|                   | YL3_CGCTCATT-ATAGAGGC_comp21618_seq1 | 91.799 | 756  | 59  | 1  | 640  | 1392 | 410  | 1165 | 0         | 1083 |
| HDR (DQ848676.1)  | YL3_CGCTCATT-ATAGAGGC_comp21618_seq1 | 93.145 | 248  | 17  | 0  | 397  | 644  | 1    | 248  | 2.25E-101 | 370  |
|                   | AR1_GAGATTCC-CCTATCCT_comp1158_seq0  | 81.466 | 1187 | 145 | 25 | 36   | 1206 | 120  | 1247 | 0         | 1104 |
|                   | YS2_GAGATTCC-ATAGAGGC_comp566_seq2   | 84.258 | 775  | 89  | 10 | 388  | 1156 | 1384 | 2131 | 0         | 832  |
|                   | YS2_GAGATTCC-ATAGAGGC_comp566_seq2   | 77.344 | 256  | 28  | 7  | 137  | 389  | 19   | 247  | 9.33E-49  | 196  |
|                   | AR2_GAGATTCC-GGCTCTGA_comp16125_seq3 | 83.484 | 775  | 95  | 10 | 388  | 1156 | 3012 | 3759 | 0         | 805  |
|                   | AR2_GAGATTCC-GGCTCTGA_comp16125_seq3 | 79.31  | 58   | 1   | 1  | 332  | 389  | 1829 | 1875 | 5.90E-07  | 57.2 |
|                   | YS2_GAGATTCC-ATAGAGGC_comp29331_seq0 | 92.727 | 165  | 12  | 0  | 315  | 479  | 1    | 165  | 2.05E-63  | 244  |
|                   | YS2_GAGATTCC-ATAGAGGC_comp29331_seq0 | 92.391 | 92   | 7   | 0  | 477  | 568  | 1003 | 1094 | 2.68E-30  | 134  |
|                   | YS1_GAGATTCC-TATAGCCT_comp15918_seq0 | 96.552 | 58   | 2   | 0  | 332  | 389  | 1203 | 1260 | 6.72E-19  | 96.9 |
| IDI1 (EU135981.1) | AR1_GAGATTCC-CCTATCCT_comp8039_seq0  | 87.905 | 1265 | 147 | 2  | 2    | 1263 | 301  | 1562 | 0         | 1588 |
|                   | AR1_GAGATTCC-CCTATCCT_comp30038_seq0 | 89.655 | 29   | 3   | 0  | 1196 | 1224 | 30   | 2    | 0.16      | 39.2 |
|                   | YL3_CGCTCATT-ATAGAGGC_comp1244_seq0  | 95.455 | 22   | 1   | 0  | 39   | 60   | 3610 | 3589 | 1.9       | 35.6 |
|                   | AR2_GAGATTCC-GGCTCTGA_comp5097_seq2  | 91.667 | 24   | 2   | 0  | 691  | 714  | 2295 | 2318 | 1.9       | 35.6 |
|                   | YL3_CGCTCATT-ATAGAGGC_comp1244_seq6  | 95.455 | 22   | 1   | 0  | 39   | 60   | 3498 | 3477 | 1.9       | 35.6 |
| GPPS (KF561462.1) |                                      |        |      |     |    |      |      |      |      |           |      |
|                   |                                      |        |      |     |    |      |      |      |      |           |      |
|                   |                                      |        |      |     |    |      |      |      |      |           |      |
|                   |                                      |        |      |     |    |      |      |      |      |           |      |
|                   |                                      |        |      |     |    |      |      |      |      |           |      |

TableS1

|                    |                                      |        |      |     |    |      |      |      |      |           |      |
|--------------------|--------------------------------------|--------|------|-----|----|------|------|------|------|-----------|------|
|                    | YL1_CGCTCATT-TATAGCCT_comp695_seq0   | 85.882 | 1615 | 215 | 6  | 153  | 1762 | 323  | 1929 | 0         | 1869 |
|                    | YL1_CGCTCATT-TATAGCCT_comp695_seq0   | 89.189 | 37   | 4   | 0  | 91   | 127  | 285  | 321  | 1.23E-04  | 50   |
|                    | YS1_GAGATTCC-TATAGCCT_comp841_seq0   | 87.888 | 677  | 77  | 2  | 1090 | 1762 | 1649 | 2324 | 0         | 847  |
|                    | OL3_CGCTCATT-GGCTCTGA_comp6736_seq2  | 80.46  | 783  | 121 | 5  | 93   | 874  | 185  | 936  | 0         | 729  |
|                    | YL3_CGCTCATT-ATAGAGGC_comp13409_seq0 | 86.965 | 537  | 65  | 2  | 1230 | 1762 | 874  | 1409 | 0         | 648  |
|                    | YL3_CGCTCATT-ATAGAGGC_comp13409_seq0 | 95.833 | 24   | 1   | 0  | 1090 | 1113 | 390  | 413  | 0.22      | 39.2 |
|                    | YS1_GAGATTCC-TATAGCCT_comp19336_seq1 | 87.847 | 288  | 35  | 0  | 943  | 1230 | 2    | 289  | 1.49E-98  | 361  |
|                    | YS1_GAGATTCC-TATAGCCT_comp19336_seq1 | 88.764 | 89   | 10  | 0  | 1481 | 1569 | 1169 | 1257 | 1.01E-24  | 116  |
| GES (JN882024.1)   | YS1_GAGATTCC-TATAGCCT_comp19336_seq1 | 95.833 | 24   | 1   | 0  | 1230 | 1253 | 726  | 749  | 0.22      | 39.2 |
|                    | AR1_GAGATTCC-CCTATCCT_comp589_seq7   | 79.961 | 1537 | 300 | 2  | 23   | 1551 | 1306 | 2842 | 0         | 1382 |
|                    | AR1_GAGATTCC-CCTATCCT_comp2452_seq0  | 81.882 | 861  | 156 | 0  | 316  | 1176 | 1    | 861  | 0         | 850  |
|                    | AR1_GAGATTCC-CCTATCCT_comp2452_seq0  | 79.191 | 173  | 26  | 2  | 1385 | 1555 | 866  | 1030 | 4.58E-35  | 150  |
|                    | YL3_CGCTCATT-ATAGAGGC_comp1775_seq0  | 80.248 | 805  | 149 | 2  | 753  | 1555 | 2    | 798  | 0         | 735  |
|                    | YS1_GAGATTCC-TATAGCCT_comp8154_seq1  | 80.863 | 371  | 61  | 2  | 1187 | 1555 | 5    | 367  | 8.82E-95  | 349  |
| G10H (AJ251269.1)  | AR1_GAGATTCC-CCTATCCT_comp7341_seq0  | 73.913 | 184  | 48  | 0  | 1164 | 1347 | 1434 | 1617 | 9.45E-25  | 116  |
|                    | YL3_CGCTCATT-ATAGAGGC_comp70_seq0    | 87.871 | 1113 | 135 | 0  | 129  | 1241 | 146  | 1258 | 0         | 1398 |
|                    | OL3_CGCTCATT-GGCTCTGA_comp191_seq2   | 86.667 | 600  | 80  | 0  | 642  | 1241 | 1622 | 2221 | 0         | 722  |
|                    | AR1_GAGATTCC-CCTATCCT_comp635_seq0   | 68.704 | 949  | 280 | 9  | 298  | 1233 | 2061 | 3005 | 2.28E-94  | 347  |
|                    | AR1_GAGATTCC-CCTATCCT_comp635_seq0   | 72.185 | 151  | 36  | 2  | 136  | 283  | 1792 | 1939 | 5.04E-14  | 80.6 |
|                    | YS1_GAGATTCC-TATAGCCT_comp6458_seq0  | 82.158 | 241  | 43  | 0  | 732  | 972  | 1    | 241  | 2.44E-62  | 241  |
| 10HGO (KF302069.1) | YS2_GAGATTCC-ATAGAGGC_comp2835_seq1  | 82.553 | 235  | 41  | 0  | 738  | 972  | 1    | 235  | 8.52E-62  | 239  |
|                    | YL3_CGCTCATT-ATAGAGGC_comp477_seq1   | 84.9   | 1053 | 159 | 0  | 115  | 1167 | 409  | 1461 | 0         | 1182 |
|                    | YL3_CGCTCATT-ATAGAGGC_comp477_seq1   | 86.667 | 120  | 16  | 0  | 1    | 120  | 199  | 318  | 1.36E-33  | 145  |
|                    | YS1_GAGATTCC-TATAGCCT_comp296_seq0   | 69.685 | 1049 | 292 | 11 | 78   | 1106 | 302  | 1344 | 6.55E-120 | 432  |
|                    | OL1_CGCTCATT-CCTATCCT_comp26_seq0    | 65.448 | 1094 | 340 | 15 | 82   | 1153 | 195  | 1272 | 9.75E-61  | 235  |
|                    | OL1_CGCTCATT-CCTATCCT_comp11291_seq2 | 66.289 | 353  | 97  | 9  | 758  | 1099 | 1363 | 1704 | 4.74E-14  | 80.6 |
|                    | OL1_CGCTCATT-CCTATCCT_comp11291_seq2 | 95.652 | 23   | 0   | 1  | 871  | 893  | 1552 | 1573 | 6.2       | 33.7 |
| IS (JX974564.1)    | AR2_GAGATTCC-GGCTCTGA_comp6919_seq0  | 84.211 | 38   | 5   | 1  | 37   | 74   | 234  | 270  | 0.15      | 39.2 |
|                    | OL1_CGCTCATT-CCTATCCT_comp520_seq1   | 83.735 | 1537 | 246 | 2  | 14   | 1548 | 261  | 1795 | 0         | 1640 |
|                    | AR2_GAGATTCC-GGCTCTGA_comp3144_seq0  | 85.755 | 351  | 50  | 0  | 1198 | 1548 | 431  | 781  | 9.97E-113 | 408  |
|                    | OL3_CGCTCATT-GGCTCTGA_comp13994_seq0 | 89.416 | 274  | 29  | 0  | 661  | 934  | 3    | 276  | 3.72E-99  | 363  |
|                    | YS1_GAGATTCC-TATAGCCT_comp11762_seq0 | 89.286 | 252  | 27  | 0  | 683  | 934  | 1    | 252  | 6.30E-90  | 333  |
|                    | YS1_GAGATTCC-TATAGCCT_comp11762_seq0 | 80.682 | 88   | 17  | 0  | 1206 | 1293 | 1686 | 1773 | 1.81E-14  | 82.4 |
|                    | YS1_GAGATTCC-TATAGCCT_comp17871_seq1 | 90.244 | 205  | 20  | 0  | 730  | 934  | 1    | 205  | 3.49E-74  | 280  |
| IO (KF302066.1)    | YS1_GAGATTCC-TATAGCCT_comp17871_seq1 | 86.869 | 99   | 13  | 0  | 933  | 1031 | 1040 | 1138 | 7.21E-26  | 120  |
|                    | YS2_GAGATTCC-ATAGAGGC_comp558_seq3   | 84.855 | 1446 | 219 | 0  | 75   | 1520 | 832  | 2277 | 0         | 1620 |
|                    | OL3_CGCTCATT-GGCTCTGA_comp2126_seq0  | 84.165 | 1162 | 184 | 0  | 70   | 1231 | 72   | 1233 | 0         | 1267 |
|                    | YS2_GAGATTCC-ATAGAGGC_comp8577_seq0  | 67.845 | 1415 | 415 | 20 | 98   | 1492 | 162  | 1556 | 4.50E-124 | 446  |
|                    | YL3_CGCTCATT-ATAGAGGC_comp1412_seq1  | 83.74  | 369  | 60  | 0  | 1160 | 1528 | 1388 | 1756 | 7.13E-109 | 396  |
| 7DLGT (AB733667.1) | YS1_GAGATTCC-TATAGCCT_comp607_seq1   | 84.928 | 345  | 52  | 0  | 1184 | 1528 | 1063 | 1407 | 1.06E-106 | 389  |
|                    | YL1_CGCTCATT-TATAGCCT_comp444_seq0   | 85.597 | 1222 | 156 | 7  | 662  | 1874 | 835  | 2045 | 0         | 1397 |



TableS1

|                                     |                                      |        |      |     |     |      |      |      |      |           |      |
|-------------------------------------|--------------------------------------|--------|------|-----|-----|------|------|------|------|-----------|------|
| 7DLH (KF415115.1)                   | YL1_CGCTCATT-TATAGCCT_comp444_seq0   | 86.364 | 506  | 66  | 1   | 165  | 667  | 236  | 741  | 3.58E-170 | 600  |
|                                     | OL1_CGCTCATT-CCTATCCT_comp2662_seq1  | 68.421 | 1121 | 329 | 13  | 614  | 1726 | 783  | 1886 | 3.36E-107 | 390  |
|                                     | OL1_CGCTCATT-CCTATCCT_comp2662_seq1  | 73.469 | 98   | 26  | 0   | 233  | 330  | 408  | 505  | 7.44E-08  | 60.8 |
|                                     | AR2_GAGATTCC-GGCTCTGA_comp35_seq9    | 66.021 | 1498 | 477 | 14  | 233  | 1717 | 742  | 2220 | 9.02E-102 | 372  |
|                                     | OL3_CGCTCATT-GGCTCTGA_comp1360_seq3  | 68.489 | 1006 | 280 | 16  | 735  | 1726 | 1112 | 2094 | 3.59E-94  | 347  |
|                                     | AR2_GAGATTCC-GGCTCTGA_comp17345_seq0 | 67.033 | 1183 | 349 | 16  | 569  | 1735 | 494  | 1651 | 5.33E-92  | 340  |
|                                     | YS2_GAGATTCC-ATAGAGGC_comp88_seq3    | 85.714 | 1078 | 151 | 1   | 39   | 1116 | 385  | 1459 | 0         | 1249 |
|                                     | YS2_GAGATTCC-ATAGAGGC_comp1328_seq0  | 86.269 | 1005 | 135 | 1   | 112  | 1116 | 5289 | 6290 | 0         | 1189 |
|                                     | YL1_CGCTCATT-TATAGCCT_comp5423_seq0  | 84.903 | 828  | 122 | 1   | 39   | 866  | 2873 | 3697 | 0         | 928  |
|                                     | YL1_CGCTCATT-TATAGCCT_comp5423_seq0  | 89.535 | 344  | 36  | 0   | 773  | 1116 | 2120 | 2463 | 4.50E-128 | 459  |
| LAMT (EU057974.1)                   | YL1_CGCTCATT-TATAGCCT_comp5423_seq0  | 83.871 | 31   | 5   | 0   | 551  | 581  | 878  | 908  | 5.9       | 33.7 |
|                                     | OL3_CGCTCATT-GGCTCTGA_comp1728_seq2  | 83.862 | 756  | 116 | 2   | 24   | 779  | 238  | 987  | 0         | 810  |
|                                     | OL3_CGCTCATT-GGCTCTGA_comp1728_seq2  | 88.663 | 344  | 39  | 0   | 773  | 1116 | 2169 | 2512 | 9.91E-124 | 444  |
|                                     | YS1_GAGATTCC-TATAGCCT_comp18495_seq0 | 88.53  | 558  | 64  | 0   | 559  | 1116 | 2842 | 3399 | 0         | 719  |
|                                     | AR2_GAGATTCC-GGCTCTGA_comp35_seq9    | 86.951 | 1617 | 203 | 2   | 15   | 1630 | 631  | 2240 | 0         | 1963 |
|                                     | YS1_GAGATTCC-TATAGCCT_comp24972_seq0 | 87.259 | 1295 | 165 | 0   | 342  | 1636 | 1436 | 2730 | 0         | 1591 |
|                                     | YS1_GAGATTCC-TATAGCCT_comp24972_seq0 | 86.722 | 241  | 32  | 0   | 105  | 345  | 3    | 243  | 2.32E-77  | 291  |
|                                     | YS1_GAGATTCC-TATAGCCT_comp24972_seq0 | 72.973 | 74   | 5   | 3   | 1661 | 1732 | 2785 | 2845 | 0.005     | 44.6 |
|                                     | YL1_CGCTCATT-TATAGCCT_comp7664_seq0  | 86.38  | 1138 | 155 | 0   | 499  | 1636 | 317  | 1454 | 0         | 1353 |
|                                     | YL1_CGCTCATT-TATAGCCT_comp7664_seq0  | 83.929 | 168  | 27  | 0   | 63   | 230  | 150  | 317  | 3.02E-44  | 181  |
| SLS1 (L10081.1)                     | YL1_CGCTCATT-TATAGCCT_comp7664_seq0  | 72.973 | 74   | 5   | 3   | 1661 | 1732 | 1509 | 1569 | 0.005     | 44.6 |
|                                     | YL1_CGCTCATT-TATAGCCT_comp14816_seq0 | 86.883 | 831  | 109 | 0   | 806  | 1636 | 424  | 1254 | 0         | 1007 |
|                                     | YL1_CGCTCATT-TATAGCCT_comp14816_seq0 | 89.6   | 250  | 26  | 0   | 565  | 814  | 1    | 250  | 2.17E-90  | 334  |
|                                     | YL1_CGCTCATT-TATAGCCT_comp14816_seq0 | 72.973 | 74   | 5   | 3   | 1661 | 1732 | 1309 | 1369 | 0.005     | 44.6 |
|                                     | YS2_GAGATTCC-ATAGAGGC_comp2723_seq0  | 86.845 | 821  | 108 | 0   | 816  | 1636 | 478  | 1298 | 0         | 994  |
|                                     | YS2_GAGATTCC-ATAGAGGC_comp2723_seq0  | 86.264 | 182  | 25  | 0   | 52   | 233  | 101  | 282  | 1.46E-54  | 215  |
|                                     | YS2_GAGATTCC-ATAGAGGC_comp2723_seq0  | 72.973 | 74   | 5   | 3   | 1661 | 1732 | 1353 | 1413 | 0.005     | 44.6 |
|                                     | AR2_GAGATTCC-GGCTCTGA_comp35_seq9    | 87.626 | 1584 | 196 | 0   | 1    | 1584 | 667  | 2250 | 0         | 1974 |
|                                     | YS1_GAGATTCC-TATAGCCT_comp24972_seq0 | 87.792 | 1286 | 157 | 0   | 286  | 1571 | 1436 | 2721 | 0         | 1611 |
|                                     | YS1_GAGATTCC-TATAGCCT_comp24972_seq0 | 86.307 | 241  | 33  | 0   | 49   | 289  | 3    | 243  | 8.40E-76  | 286  |
| SLS2 (KF309242.1)                   | YL1_CGCTCATT-TATAGCCT_comp7664_seq0  | 86.714 | 1129 | 150 | 0   | 443  | 1571 | 317  | 1445 | 0         | 1361 |
|                                     | YL1_CGCTCATT-TATAGCCT_comp7664_seq0  | 82.738 | 168  | 29  | 0   | 7    | 174  | 150  | 317  | 1.33E-41  | 172  |
|                                     | YL1_CGCTCATT-TATAGCCT_comp14816_seq0 | 87.698 | 821  | 101 | 0   | 751  | 1571 | 425  | 1245 | 0         | 1025 |
|                                     | YL1_CGCTCATT-TATAGCCT_comp14816_seq0 | 86.8   | 250  | 33  | 0   | 509  | 758  | 1    | 250  | 1.09E-80  | 302  |
|                                     | YS2_GAGATTCC-ATAGAGGC_comp2723_seq0  | 87.562 | 812  | 101 | 0   | 760  | 1571 | 478  | 1289 | 0         | 1009 |
|                                     | YS2_GAGATTCC-ATAGAGGC_comp2723_seq0  | 84.746 | 177  | 27  | 0   | 1    | 177  | 106  | 282  | 3.35E-49  | 197  |
|                                     | YS2_GAGATTCC-ATAGAGGC_comp2723_seq0  | 90     | 30   | 3   | 0   | 503  | 532  | 454  | 483  | 0.057     | 41   |
|                                     | known MIA genes from <i>C. roseu</i> | 78.534 | 955  | 195 | 4   | 44   | 991  | 102  | 1053 | 0         | 789  |
|                                     | YS2_GAGATTCC-ATAGAGGC_comp2161_seq0  | 82.051 | 39   | 7   | 0   | 815  | 853  | 8327 | 8365 | 0.15      | 39.2 |
|                                     | YL3_CGCTCATT-ATAGAGGC_comp4991_seq1  | 82.051 | 39   | 7   | 0   | 815  | 853  | 2791 | 2829 | 0.15      | 39.2 |
| OL1_CGCTCATT-CCTATCCT_comp1693_seq1 | 92.308                               | 26     | 2    | 0   | 904 | 929  | 1163 | 1188 | 0.15 | 39.2      |      |

TableS1

|                    |                                      |        |      |     |    |      |      |      |      |           |      |
|--------------------|--------------------------------------|--------|------|-----|----|------|------|------|------|-----------|------|
| STR (X53602.1)     | YL3_CGCTCATT-ATAGAGGC_comp10885_seq1 | 95.652 | 23   | 1   | 0  | 1045 | 1067 | 1410 | 1388 | 0.51      | 37.4 |
|                    | YS2_GAGATTCC-ATAGAGGC_comp324_seq0   | 80.227 | 1057 | 201 | 4  | 1    | 1050 | 661  | 1716 | 0         | 953  |
|                    | YS2_GAGATTCC-ATAGAGGC_comp324_seq0   | 75.844 | 385  | 88  | 2  | 1050 | 1433 | 1786 | 2166 | 1.67E-71  | 271  |
|                    | YL3_CGCTCATT-ATAGAGGC_comp4131_seq0  | 70.44  | 159  | 45  | 2  | 824  | 981  | 1727 | 1884 | 3.69E-10  | 68   |
|                    | YS1_GAGATTCC-TATAGCCT_comp9626_seq1  | 84.211 | 38   | 5   | 1  | 831  | 868  | 668  | 632  | 0.18      | 39.2 |
|                    | AR1_GAGATTCC-CCTATCCT_comp8861_seq1  | 100    | 21   | 0   | 0  | 437  | 457  | 1687 | 1667 | 0.18      | 39.2 |
| TDC (MG748691.1)   | YL3_CGCTCATT-ATAGAGGC_comp9172_seq1  | 84.211 | 38   | 5   | 1  | 831  | 868  | 659  | 623  | 0.18      | 39.2 |
|                    | YL1_CGCTCATT-TATAGCCT_comp255_seq0   | 79.31  | 1537 | 265 | 11 | 133  | 1662 | 1595 | 3085 | 0         | 1337 |
|                    | OL1_CGCTCATT-CCTATCCT_comp1264_seq0  | 77.739 | 867  | 184 | 5  | 417  | 1277 | 391  | 1254 | 0         | 679  |
|                    | OL1_CGCTCATT-CCTATCCT_comp1264_seq0  | 85.256 | 156  | 23  | 0  | 1430 | 1585 | 1251 | 1406 | 3.30E-43  | 178  |
|                    | OL1_CGCTCATT-CCTATCCT_comp1264_seq0  | 86.429 | 140  | 19  | 0  | 263  | 402  | 76   | 215  | 5.97E-40  | 167  |
|                    | OL3_CGCTCATT-GGCTCTGA_comp686_seq1   | 83.443 | 610  | 98  | 2  | 478  | 1084 | 958  | 1567 | 0         | 639  |
|                    | OL3_CGCTCATT-GGCTCTGA_comp686_seq1   | 87.931 | 348  | 40  | 2  | 133  | 479  | 517  | 863  | 9.43E-120 | 432  |
|                    | OL3_CGCTCATT-GGCTCTGA_comp686_seq1   | 73.469 | 490  | 100 | 3  | 1173 | 1662 | 1838 | 2297 | 2.22E-83  | 311  |
|                    | YL3_CGCTCATT-ATAGAGGC_comp1113_seq0  | 71.298 | 655  | 152 | 8  | 931  | 1580 | 2    | 625  | 2.37E-89  | 331  |
|                    | AR2_GAGATTCC-GGCTCTGA_comp5833_seq1  | 67.018 | 949  | 282 | 8  | 142  | 1082 | 378  | 1303 | 5.96E-78  | 293  |
| SGD (EU072423.1)   | AR2_GAGATTCC-GGCTCTGA_comp5833_seq1  | 67.974 | 153  | 46  | 1  | 1417 | 1566 | 1608 | 1760 | 9.48E-06  | 53.6 |
|                    | OL1_CGCTCATT-CCTATCCT_comp374_seq0   | 86.575 | 1095 | 147 | 0  | 1    | 1095 | 176  | 1270 | 0         | 1312 |
|                    | AR2_GAGATTCC-GGCTCTGA_comp706_seq1   | 86.066 | 1098 | 150 | 1  | 1    | 1095 | 61   | 1158 | 0         | 1288 |
|                    | AR2_GAGATTCC-GGCTCTGA_comp706_seq3   | 86.066 | 1098 | 150 | 1  | 1    | 1095 | 61   | 1158 | 0         | 1288 |
|                    | AR2_GAGATTCC-GGCTCTGA_comp706_seq4   | 86.066 | 1098 | 150 | 1  | 1    | 1095 | 61   | 1158 | 0         | 1288 |
| GS1 (KF302079.1)   | YL3_CGCTCATT-ATAGAGGC_comp123_seq0   | 85.845 | 1095 | 155 | 0  | 1    | 1095 | 2080 | 3174 | 0         | 1276 |
|                    | OL1_CGCTCATT-CCTATCCT_comp374_seq0   | 84.081 | 1093 | 168 | 1  | 1    | 1087 | 176  | 1268 | 0         | 1187 |
|                    | YL3_CGCTCATT-ATAGAGGC_comp123_seq0   | 83.715 | 1093 | 172 | 1  | 1    | 1087 | 2080 | 3172 | 0         | 1169 |
|                    | AR2_GAGATTCC-GGCTCTGA_comp706_seq1   | 83.212 | 1096 | 175 | 2  | 1    | 1087 | 61   | 1156 | 0         | 1146 |
|                    | AR2_GAGATTCC-GGCTCTGA_comp706_seq3   | 83.212 | 1096 | 175 | 2  | 1    | 1087 | 61   | 1156 | 0         | 1146 |
| GS2 (KF302078.1)   | AR2_GAGATTCC-GGCTCTGA_comp706_seq4   | 83.212 | 1096 | 175 | 2  | 1    | 1087 | 61   | 1156 | 0         | 1146 |
|                    | AR1_GAGATTCC-CCTATCCT_comp3108_seq0  | 81.699 | 1071 | 181 | 2  | 6    | 1064 | 157  | 1224 | 0         | 1052 |
|                    | OL1_CGCTCATT-CCTATCCT_comp14114_seq0 | 74.637 | 757  | 160 | 7  | 325  | 1062 | 501  | 1244 | 1.72E-139 | 497  |
|                    | YL3_CGCTCATT-ATAGAGGC_comp42_seq0    | 69.436 | 1047 | 276 | 11 | 40   | 1052 | 177  | 1213 | 4.92E-121 | 435  |
|                    | AR1_GAGATTCC-CCTATCCT_comp80_seq0    | 67.739 | 1057 | 305 | 10 | 38   | 1064 | 287  | 1337 | 3.79E-97  | 356  |
| THAS1 (KM524258.1) | AR1_GAGATTCC-CCTATCCT_comp3050_seq0  | 67.739 | 1057 | 305 | 10 | 38   | 1064 | 281  | 1331 | 3.79E-97  | 356  |
|                    | OL1_CGCTCATT-CCTATCCT_comp3640_seq0  | 75.909 | 1100 | 260 | 3  | 18   | 1116 | 210  | 1305 | 0         | 780  |
|                    | YS2_GAGATTCC-ATAGAGGC_comp697_seq4   | 78.672 | 783  | 162 | 3  | 11   | 792  | 98   | 876  | 0         | 650  |
|                    | YS2_GAGATTCC-ATAGAGGC_comp697_seq4   | 72.566 | 113  | 31  | 0  | 949  | 1061 | 1033 | 1145 | 3.48E-09  | 64.4 |
|                    | OL3_CGCTCATT-GGCTCTGA_comp1793_seq1  | 73.4   | 1094 | 284 | 5  | 25   | 1116 | 2866 | 3954 | 0         | 645  |
|                    | YS2_GAGATTCC-ATAGAGGC_comp4098_seq3  | 73.4   | 1094 | 284 | 5  | 25   | 1116 | 4818 | 5906 | 0         | 645  |
| THAS2 (KU865323.1) | YL1_CGCTCATT-TATAGCCT_comp13612_seq0 | 75.938 | 906  | 213 | 3  | 206  | 1110 | 847  | 1748 | 0         | 643  |
|                    | OL1_CGCTCATT-CCTATCCT_comp3640_seq0  | 81.088 | 1121 | 192 | 6  | 18   | 1134 | 201  | 1305 | 0         | 1058 |
|                    | OL3_CGCTCATT-GGCTCTGA_comp1793_seq1  | 80.454 | 926  | 161 | 6  | 213  | 1134 | 3045 | 3954 | 0         | 845  |
|                    | YS2_GAGATTCC-ATAGAGGC_comp4098_seq3  | 80.454 | 926  | 161 | 6  | 213  | 1134 | 4997 | 5906 | 0         | 845  |

TableS1

|                     |                                      |        |      |     |    |      |      |      |      |           |      |
|---------------------|--------------------------------------|--------|------|-----|----|------|------|------|------|-----------|------|
|                     | YL1_CGCTCATT-TATAGCCT_comp13612_seq0 | 79.563 | 915  | 173 | 4  | 215  | 1128 | 847  | 1748 | 0         | 801  |
| THAS3 (KU865322.1)  | YS2_GAGATTCC-ATAGAGGC_comp697_seq4   | 70.31  | 1098 | 302 | 9  | 18   | 1109 | 96   | 1175 | 7.74E-138 | 491  |
|                     | AR1_GAGATTCC-CCTATCCT_comp3108_seq0  | 81.648 | 1068 | 194 | 2  | 1    | 1067 | 158  | 1224 | 0         | 1036 |
|                     | OL1_CGCTCATT-CCTATCCT_comp14114_seq0 | 76.923 | 767  | 159 | 7  | 305  | 1065 | 490  | 1244 | 9.57E-162 | 571  |
|                     | AR1_GAGATTCC-CCTATCCT_comp80_seq0    | 68.587 | 1076 | 320 | 9  | 7    | 1067 | 265  | 1337 | 5.31E-108 | 392  |
|                     | OL1_CGCTCATT-CCTATCCT_comp1134_seq1  | 68.03  | 1076 | 326 | 9  | 7    | 1067 | 141  | 1213 | 7.38E-100 | 365  |
| THAS4 (KU865324.1)  | AR1_GAGATTCC-CCTATCCT_comp3050_seq0  | 67.844 | 1076 | 328 | 9  | 7    | 1067 | 259  | 1331 | 3.82E-97  | 356  |
|                     | AR1_GAGATTCC-CCTATCCT_comp3108_seq0  | 82.303 | 1068 | 187 | 2  | 1    | 1067 | 158  | 1224 | 0         | 1067 |
|                     | OL1_CGCTCATT-CCTATCCT_comp14114_seq0 | 77.004 | 761  | 159 | 6  | 310  | 1065 | 495  | 1244 | 9.57E-162 | 571  |
|                     | AR1_GAGATTCC-CCTATCCT_comp80_seq0    | 69.274 | 1074 | 316 | 6  | 7    | 1067 | 265  | 1337 | 4.96E-121 | 435  |
|                     | OL1_CGCTCATT-CCTATCCT_comp1134_seq1  | 68.715 | 1074 | 322 | 6  | 7    | 1067 | 141  | 1213 | 6.90E-113 | 408  |
| HYS (KU865325.1)    | AR1_GAGATTCC-CCTATCCT_comp3050_seq0  | 68.063 | 1074 | 329 | 6  | 7    | 1067 | 259  | 1331 | 4.08E-103 | 376  |
|                     | YL1_CGCTCATT-TATAGCCT_comp32_seq1    | 82.626 | 1508 | 256 | 2  | 1    | 1505 | 244  | 1748 | 0         | 1535 |
|                     | YL1_CGCTCATT-TATAGCCT_comp32_seq4    | 82.626 | 1508 | 256 | 2  | 1    | 1505 | 244  | 1748 | 0         | 1535 |
|                     | YL3_CGCTCATT-ATAGAGGC_comp58_seq1    | 82.56  | 1508 | 257 | 2  | 1    | 1505 | 201  | 1705 | 0         | 1530 |
|                     | YS2_GAGATTCC-ATAGAGGC_comp3760_seq0  | 84.491 | 619  | 96  | 0  | 887  | 1505 | 992  | 1610 | 0         | 684  |
| GO (MF770508.1)     | AR2_GAGATTCC-GGCTCTGA_comp139_seq0   | 67.253 | 1478 | 432 | 21 | 7    | 1461 | 173  | 1621 | 6.98E-121 | 435  |
|                     | OL3_CGCTCATT-GGCTCTGA_comp6787_seq2  | 85.747 | 863  | 123 | 0  | 1    | 863  | 37   | 899  | 0         | 1002 |
|                     | YL1_CGCTCATT-TATAGCCT_comp16622_seq1 | 85.315 | 858  | 126 | 0  | 194  | 1051 | 1429 | 2286 | 0         | 980  |
|                     | YS2_GAGATTCC-ATAGAGGC_comp697_seq1   | 85.315 | 858  | 126 | 0  | 194  | 1051 | 1531 | 2388 | 0         | 980  |
|                     | YL3_CGCTCATT-ATAGAGGC_comp42_seq0    | 81.526 | 996  | 184 | 0  | 56   | 1051 | 223  | 1218 | 0         | 967  |
| redox1 (MF770509.1) | AR1_GAGATTCC-CCTATCCT_comp530_seq0   | 77.333 | 975  | 210 | 4  | 84   | 1051 | 371  | 1341 | 0         | 755  |
|                     | YL3_CGCTCATT-ATAGAGGC_comp101_seq3   | 82.613 | 972  | 169 | 0  | 1    | 972  | 133  | 1104 | 0         | 991  |
|                     | AR2_GAGATTCC-GGCTCTGA_comp687_seq0   | 80.844 | 569  | 109 | 0  | 1    | 569  | 98   | 666  | 6.19E-151 | 535  |
|                     | AR2_GAGATTCC-GGCTCTGA_comp687_seq0   | 85.217 | 230  | 34  | 0  | 743  | 972  | 1832 | 2061 | 5.82E-69  | 262  |
|                     | AR2_GAGATTCC-GGCTCTGA_comp687_seq0   | 87.634 | 186  | 23  | 0  | 564  | 749  | 1009 | 1194 | 9.85E-60  | 232  |
|                     | YL3_CGCTCATT-ATAGAGGC_comp101_seq2   | 80.316 | 569  | 112 | 0  | 1    | 569  | 133  | 701  | 3.91E-147 | 522  |
|                     | YL3_CGCTCATT-ATAGAGGC_comp101_seq2   | 86.308 | 409  | 56  | 0  | 564  | 972  | 1044 | 1452 | 2.81E-136 | 486  |
|                     | YS1_GAGATTCC-TATAGCCT_comp65_seq1    | 80.316 | 569  | 112 | 0  | 1    | 569  | 94   | 662  | 3.91E-147 | 522  |
|                     | YS1_GAGATTCC-TATAGCCT_comp65_seq1    | 86.308 | 409  | 56  | 0  | 564  | 972  | 1005 | 1413 | 2.81E-136 | 486  |
|                     | AR2_GAGATTCC-GGCTCTGA_comp12013_seq0 | 73.893 | 858  | 210 | 7  | 37   | 887  | 199  | 1049 | 4.76E-146 | 518  |
| redox2 (MF770510.1) | AR2_GAGATTCC-GGCTCTGA_comp12013_seq0 | 91.667 | 24   | 2   | 0  | 949  | 972  | 1078 | 1101 | 1.5       | 35.6 |
|                     | YL3_CGCTCATT-ATAGAGGC_comp1258_seq0  | 79.013 | 1277 | 242 | 7  | 1    | 1261 | 163  | 1429 | 0         | 1086 |
|                     | AR2_GAGATTCC-GGCTCTGA_comp10632_seq0 | 71.654 | 254  | 61  | 5  | 122  | 368  | 178  | 427  | 1.68E-26  | 122  |
|                     | AR2_GAGATTCC-GGCTCTGA_comp10632_seq0 | 70.588 | 119  | 33  | 2  | 740  | 857  | 835  | 952  | 8.72E-05  | 50   |
|                     | YL1_CGCTCATT-TATAGCCT_comp10318_seq0 | 63.83  | 799  | 238 | 18 | 11   | 782  | 67   | 841  | 4.51E-21  | 104  |
|                     | YL1_CGCTCATT-TATAGCCT_comp10318_seq0 | 71.895 | 153  | 43  | 0  | 1089 | 1241 | 1184 | 1336 | 1.48E-14  | 82.4 |
|                     | YS2_GAGATTCC-ATAGAGGC_comp4073_seq1  | 81.034 | 58   | 11  | 0  | 1048 | 1105 | 1174 | 1231 | 2.05E-06  | 55.4 |
| SAT (MF770511.1)    | YS1_GAGATTCC-TATAGCCT_comp9325_seq0  | 93.75  | 32   | 2   | 0  | 1073 | 1104 | 1188 | 1219 | 8.72E-05  | 50   |
|                     | YS2_GAGATTCC-ATAGAGGC_comp776_seq0   | 76.106 | 1582 | 344 | 7  | 16   | 1579 | 126  | 1691 | 0         | 1148 |
|                     | AR2_GAGATTCC-GGCTCTGA_comp14833_seq0 | 67.846 | 1583 | 453 | 21 | 11   | 1568 | 4    | 1555 | 2.75E-145 | 517  |

TableS1

|                    |                                      |        |      |     |    |      |      |      |      |           |      |
|--------------------|--------------------------------------|--------|------|-----|----|------|------|------|------|-----------|------|
|                    | AR2_GAGATTCC-GGCTCTGA_comp21526_seq0 | 71.014 | 414  | 120 | 0  | 397  | 810  | 539  | 952  | 6.49E-52  | 206  |
|                    | AR2_GAGATTCC-GGCTCTGA_comp21526_seq0 | 71.823 | 181  | 45  | 3  | 143  | 317  | 217  | 397  | 1.25E-16  | 89.7 |
|                    | AR2_GAGATTCC-GGCTCTGA_comp21526_seq0 | 72.794 | 136  | 36  | 1  | 1445 | 1579 | 1569 | 1704 | 2.76E-12  | 75.2 |
| PAS                | AR1_GAGATTCC-CCTATCCT_comp1722_seq0  | 70.36  | 361  | 107 | 0  | 432  | 792  | 500  | 860  | 1.63E-40  | 168  |
|                    | YL1_CGCTCATT-TATAGCCT_comp1884_seq0  | 67.778 | 450  | 145 | 0  | 252  | 701  | 597  | 1046 | 2.95E-37  | 158  |
|                    | YL1_CGCTCATT-TATAGCCT_comp695_seq0   | 85.882 | 1615 | 215 | 6  | 153  | 1762 | 323  | 1929 | 0         | 1869 |
|                    | YL1_CGCTCATT-TATAGCCT_comp695_seq0   | 89.189 | 37   | 4   | 0  | 91   | 127  | 285  | 321  | 0.000123  | 50   |
|                    | YS1_GAGATTCC-TATAGCCT_comp841_seq0   | 87.888 | 677  | 77  | 2  | 1090 | 1762 | 1649 | 2324 | 0         | 847  |
|                    | OL3_CGCTCATT-GGCTCTGA_comp6736_seq2  | 80.46  | 783  | 121 | 5  | 93   | 874  | 185  | 936  | 0         | 729  |
|                    | YL3_CGCTCATT-ATAGAGGC_comp13409_seq0 | 86.965 | 537  | 65  | 2  | 1230 | 1762 | 874  | 1409 | 0         | 648  |
|                    | YL3_CGCTCATT-ATAGAGGC_comp13409_seq0 | 95.833 | 24   | 1   | 0  | 1090 | 1113 | 390  | 413  | 0.22      | 39.2 |
|                    | YS1_GAGATTCC-TATAGCCT_comp19336_seq1 | 87.847 | 288  | 35  | 0  | 943  | 1230 | 2    | 289  | 1.49E-98  | 361  |
|                    | YS1_GAGATTCC-TATAGCCT_comp19336_seq1 | 88.764 | 89   | 10  | 0  | 1481 | 1569 | 1169 | 1257 | 1.01E-24  | 116  |
| DPAS (KU865331)    | YS1_GAGATTCC-TATAGCCT_comp19336_seq1 | 95.833 | 24   | 1   | 0  | 1230 | 1253 | 726  | 749  | 0.22      | 39.2 |
|                    | YL3_CGCTCATT-ATAGAGGC_comp166_seq2   | 74.669 | 983  | 216 | 9  | 10   | 983  | 284  | 1242 | 0         | 639  |
|                    | AR1_GAGATTCC-CCTATCCT_comp606_seq1   | 73.333 | 510  | 116 | 4  | 475  | 983  | 381  | 871  | 1.59E-82  | 307  |
|                    | AR2_GAGATTCC-GGCTCTGA_comp17902_seq0 | 72.757 | 301  | 64  | 2  | 684  | 984  | 207  | 489  | 1.60E-44  | 181  |
|                    | YL1_CGCTCATT-TATAGCCT_comp661_seq0   | 66.612 | 614  | 174 | 7  | 25   | 621  | 149  | 748  | 5.58E-44  | 179  |
| CS (MF770512.1)    | AR1_GAGATTCC-CCTATCCT_comp5172_seq0  | 78.417 | 139  | 30  | 0  | 845  | 983  | 13   | 151  | 5.58E-25  | 116  |
|                    | YL3_CGCTCATT-ATAGAGGC_comp166_seq2   | 80.234 | 941  | 177 | 3  | 25   | 962  | 311  | 1245 | 0         | 854  |
|                    | AR1_GAGATTCC-CCTATCCT_comp606_seq1   | 80     | 485  | 94  | 1  | 478  | 962  | 393  | 874  | 4.42E-121 | 435  |
|                    | YL1_CGCTCATT-TATAGCCT_comp661_seq0   | 67.885 | 903  | 238 | 16 | 8    | 881  | 147  | 1026 | 2.79E-79  | 297  |
|                    | AR2_GAGATTCC-GGCTCTGA_comp17902_seq0 | 80.351 | 285  | 56  | 0  | 678  | 962  | 207  | 491  | 5.76E-69  | 262  |
| TS (MF770513.1)    | YS1_GAGATTCC-TATAGCCT_comp13751_seq2 | 66.332 | 597  | 145 | 17 | 28   | 604  | 1364 | 1924 | 1.11E-33  | 145  |
|                    | YL3_CGCTCATT-ATAGAGGC_comp166_seq2   | 79.277 | 941  | 189 | 3  | 25   | 965  | 311  | 1245 | 0         | 810  |
|                    | AR1_GAGATTCC-CCTATCCT_comp606_seq1   | 78.745 | 494  | 105 | 0  | 472  | 965  | 381  | 874  | 1.19E-115 | 417  |
|                    | YL1_CGCTCATT-TATAGCCT_comp661_seq0   | 67.037 | 901  | 256 | 12 | 8    | 886  | 147  | 1028 | 3.90E-71  | 269  |
|                    | AR2_GAGATTCC-GGCTCTGA_comp17902_seq0 | 79.649 | 285  | 58  | 0  | 681  | 965  | 207  | 491  | 3.00E-66  | 253  |
| VS1 (MF770514.1)   | OL1_CGCTCATT-CCTATCCT_comp1318_seq1  | 66.534 | 502  | 135 | 7  | 28   | 523  | 84   | 558  | 3.20E-34  | 147  |
|                    | YL3_CGCTCATT-ATAGAGGC_comp166_seq2   | 80.293 | 888  | 171 | 2  | 49   | 935  | 352  | 1236 | 0         | 807  |
|                    | AR1_GAGATTCC-CCTATCCT_comp606_seq1   | 80.206 | 485  | 96  | 0  | 451  | 935  | 381  | 865  | 2.92E-123 | 443  |
|                    | AR2_GAGATTCC-GGCTCTGA_comp17902_seq0 | 80.42  | 286  | 56  | 0  | 660  | 945  | 207  | 492  | 1.62E-69  | 264  |
|                    | YL1_CGCTCATT-TATAGCCT_comp661_seq0   | 66.469 | 844  | 250 | 8  | 71   | 891  | 227  | 1060 | 1.85E-62  | 241  |
|                    | YL1_CGCTCATT-TATAGCCT_comp661_seq0   | 79.487 | 39   | 8   | 0  | 8    | 46   | 147  | 185  | 1.4       | 35.6 |
| VS2 (MF770515.1)   | AR1_GAGATTCC-CCTATCCT_comp5172_seq0  | 81.119 | 143  | 27  | 0  | 793  | 935  | 3    | 145  | 5.66E-31  | 136  |
|                    | YS2_GAGATTCC-ATAGAGGC_comp528_seq2   | 77.958 | 1538 | 304 | 6  | 1    | 1513 | 2107 | 3634 | 0         | 1251 |
|                    | YL1_CGCTCATT-TATAGCCT_comp104_seq6   | 77.893 | 1538 | 305 | 6  | 1    | 1513 | 2274 | 3801 | 0         | 1245 |
|                    | YS1_GAGATTCC-TATAGCCT_comp15820_seq1 | 74.339 | 1438 | 334 | 8  | 107  | 1513 | 305  | 1738 | 0         | 926  |
|                    | YS2_GAGATTCC-ATAGAGGC_comp37475_seq2 | 79.321 | 619  | 113 | 1  | 910  | 1513 | 998  | 1616 | 4.44E-155 | 549  |
| T16H1 (FJ647194.1) | OL3_CGCTCATT-GGCTCTGA_comp1489_seq0  | 68.279 | 1406 | 400 | 17 | 133  | 1512 | 943  | 2328 | 3.65E-137 | 489  |
|                    | YS2_GAGATTCC-ATAGAGGC_comp528_seq2   | 78.335 | 1574 | 314 | 9  | 3    | 1559 | 2077 | 3640 | 0         | 1285 |

TableS1

|                                     |                                      |                                      |        |      |     |      |      |      |      |           |           |     |
|-------------------------------------|--------------------------------------|--------------------------------------|--------|------|-----|------|------|------|------|-----------|-----------|-----|
| T16H2 (JF742645.1)                  | YL1_CGCTCATT-TATAGCCT_comp104_seq6   | 78.272                               | 1574   | 315  | 9   | 3    | 1559 | 2244 | 3807 | 0         | 1281      |     |
|                                     | YS1_GAGATTCC-TATAGCCT_comp15820_seq1 | 74.054                               | 1453   | 366  | 4   | 113  | 1558 | 295  | 1743 | 0         | 913       |     |
|                                     | YS2_GAGATTCC-ATAGAGGC_comp37475_seq2 | 81.28                                | 625    | 117  | 0   | 935  | 1559 | 998  | 1622 | 3.13E-170 | 600       |     |
|                                     | OL3_CGCTCATT-GGCTCTGA_comp1489_seq0  | 68.355                               | 1441   | 410  | 21  | 143  | 1569 | 937  | 2345 | 4.08E-137 | 489       |     |
| I6OMT (EF444544.1)                  | AR2_GAGATTCC-GGCTCTGA_comp35_seq0    | 75.923                               | 1084   | 225  | 6   | 60   | 1128 | 583  | 1645 | 0         | 783       |     |
|                                     | YS2_GAGATTCC-ATAGAGGC_comp61_seq0    | 75.668                               | 1085   | 241  | 9   | 60   | 1128 | 2794 | 3871 | 0         | 747       |     |
|                                     | AR1_GAGATTCC-CCTATCCT_comp1185_seq0  | 72.913                               | 1078   | 256  | 6   | 60   | 1128 | 581  | 1631 | 1.15E-180 | 634       |     |
|                                     | YS1_GAGATTCC-TATAGCCT_comp1836_seq0  | 72.146                               | 1095   | 257  | 9   | 49   | 1128 | 126  | 1187 | 1.94E-171 | 603       |     |
|                                     | YS2_GAGATTCC-ATAGAGGC_comp8318_seq1  | 72.628                               | 917    | 200  | 10  | 1    | 913  | 3643 | 2774 | 1.77E-147 | 524       |     |
|                                     | YS2_GAGATTCC-ATAGAGGC_comp8318_seq1  | 82.008                               | 239    | 43   | 0   | 913  | 1151 | 2478 | 2240 | 3.66E-61  | 237       |     |
|                                     | YS2_GAGATTCC-ATAGAGGC_comp8318_seq1  | 90                                   | 110    | 11   | 0   | 1325 | 1434 | 2237 | 2128 | 1.46E-34  | 149       |     |
|                                     | YL3_CGCTCATT-ATAGAGGC_comp5333_seq0  | 75.795                               | 723    | 163  | 4   | 192  | 913  | 3124 | 2413 | 1.36E-142 | 508       |     |
|                                     | YL3_CGCTCATT-ATAGAGGC_comp5333_seq0  | 79.949                               | 394    | 63   | 4   | 1078 | 1464 | 2062 | 1678 | 2.31E-95  | 351       |     |
|                                     | YS2_GAGATTCC-ATAGAGGC_comp8318_seq2  | 74.412                               | 723    | 158  | 5   | 192  | 913  | 2711 | 2015 | 9.79E-132 | 471       |     |
| T3O (LN831958.1)                    | YS2_GAGATTCC-ATAGAGGC_comp8318_seq2  | 86.765                               | 204    | 20   | 1   | 1325 | 1521 | 1588 | 1385 | 2.02E-64  | 248       |     |
|                                     | YS2_GAGATTCC-ATAGAGGC_comp8318_seq2  | 79.73                                | 74     | 15   | 0   | 1078 | 1151 | 1664 | 1591 | 1.37E-09  | 66.2      |     |
|                                     | AR1_GAGATTCC-CCTATCCT_comp629_seq5   | 67.134                               | 1354   | 379  | 26  | 168  | 1488 | 192  | 1512 | 1.66E-103 | 378       |     |
|                                     | AR1_GAGATTCC-CCTATCCT_comp5822_seq1  | 65.632                               | 1385   | 433  | 16  | 112  | 1485 | 237  | 1589 | 1.36E-85  | 318       |     |
|                                     | T3R (KP122966.1)                     | AR1_GAGATTCC-CCTATCCT_comp3108_seq0  | 77.788 | 1049 | 226 | 6    | 22   | 1068 | 189  | 1232      | 0         | 821 |
|                                     |                                      | OL1_CGCTCATT-CCTATCCT_comp14114_seq0 | 74.009 | 681  | 158 | 6    | 396  | 1071 | 591  | 1257      | 1.37E-116 | 421 |
|                                     |                                      | AR1_GAGATTCC-CCTATCCT_comp80_seq0    | 67.191 | 1018 | 309 | 12   | 67   | 1067 | 335  | 1344      | 1.13E-79  | 298 |
|                                     |                                      | OL1_CGCTCATT-CCTATCCT_comp1134_seq1  | 66.437 | 1016 | 320 | 10   | 67   | 1067 | 211  | 1220      | 5.48E-71  | 269 |
|                                     |                                      | YL3_CGCTCATT-ATAGAGGC_comp42_seq0    | 78.71  | 310  | 63  | 1    | 7    | 313  | 160  | 469       | 2.84E-68  | 260 |
|                                     |                                      | YL3_CGCTCATT-ATAGAGGC_comp42_seq0    | 66.914 | 538  | 170 | 6    | 515  | 1048 | 680  | 1213      | 1.29E-34  | 149 |
| NMT (HM584929.1)                    |                                      | YL1_CGCTCATT-TATAGCCT_comp302_seq2   | 77.549 | 971  | 192 | 15   | 25   | 978  | 211  | 1172      | 0         | 724 |
|                                     |                                      | YL1_CGCTCATT-TATAGCCT_comp302_seq2   | 75.8   | 781  | 178 | 7    | 25   | 798  | 1692 | 2468      | 7.06E-151 | 535 |
|                                     |                                      | AR2_GAGATTCC-GGCTCTGA_comp630_seq4   | 76.369 | 986  | 207 | 15   | 10   | 978  | 1276 | 2252      | 0         | 684 |
|                                     |                                      | YS1_GAGATTCC-TATAGCCT_comp198_seq4   | 75.628 | 796  | 183 | 7    | 10   | 798  | 2351 | 3142      | 1.66E-152 | 540 |
|                                     | OL3_CGCTCATT-GGCTCTGA_comp6929_seq0  | 73.598                               | 856    | 217  | 6   | 20   | 869  | 213  | 1065 | 3.43E-142 | 506       |     |
|                                     | YL1_CGCTCATT-TATAGCCT_comp938_seq4   | 75.173                               | 721    | 170  | 4   | 153  | 867  | 47   | 764  | 1.12E-135 | 484       |     |
|                                     | D4H (U71604.1)                       | AR1_GAGATTCC-CCTATCCT_comp12530_seq0 | 78.772 | 1140 | 229 | 7    | 68   | 1202 | 54   | 1185      | 0         | 946 |
|                                     |                                      | YL3_CGCTCATT-ATAGAGGC_comp5037_seq1  | 71.826 | 827  | 212 | 10   | 321  | 1141 | 2325 | 3136      | 5.21E-115 | 416 |
|                                     |                                      | YL3_CGCTCATT-ATAGAGGC_comp5037_seq1  | 82     | 50   | 9   | 0    | 139  | 188  | 2143 | 2192      | 8.30E-05  | 50  |
|                                     |                                      | YS1_GAGATTCC-TATAGCCT_comp5438_seq0  | 71.814 | 816  | 210 | 9    | 332  | 1141 | 2238 | 3039      | 6.34E-114 | 412 |
| YS1_GAGATTCC-TATAGCCT_comp5438_seq0 |                                      | 82                                   | 50     | 9    | 0   | 139  | 188  | 2046 | 2095 | 8.30E-05  | 50        |     |
| AR1_GAGATTCC-CCTATCCT_comp2987_seq0 |                                      | 69.652                               | 804    | 222  | 9   | 332  | 1127 | 359  | 1148 | 5.95E-89  | 329       |     |
| D4H (U71604.1)                      |                                      | OL1_CGCTCATT-CCTATCCT_comp614_seq1   | 69.406 | 791  | 227 | 7    | 332  | 1119 | 5056 | 5834      | 1.08E-85  | 318 |
|                                     |                                      | AR1_GAGATTCC-CCTATCCT_comp10689_seq2 | 69.337 | 1298 | 322 | 24   | 31   | 1314 | 19   | 1254      | 1.18E-142 | 508 |
|                                     |                                      | AR2_GAGATTCC-GGCTCTGA_comp333_seq6   | 66.023 | 1295 | 364 | 23   | 31   | 1314 | 142  | 1371      | 4.12E-85  | 316 |
|                                     |                                      | AR2_GAGATTCC-GGCTCTGA_comp333_seq4   | 66.023 | 1295 | 364 | 23   | 31   | 1314 | 142  | 1371      | 4.12E-85  | 316 |
|                                     | YS2_GAGATTCC-ATAGAGGC_comp13380_seq0 | 66.486                               | 555    | 168  | 7   | 202  | 753  | 575  | 1114 | 4.41E-34  | 147       |     |

TableS1

|                    |                                      |        |      |     |    |      |      |      |      |           |      |
|--------------------|--------------------------------------|--------|------|-----|----|------|------|------|------|-----------|------|
| DAT (AF053307.1)   | YS2_GAGATTCC-ATAGAGGC_comp13380_seq0 | 69.082 | 207  | 52  | 3  | 1108 | 1314 | 1415 | 1609 | 1.54E-14  | 82.4 |
|                    | YS2_GAGATTCC-ATAGAGGC_comp13380_seq0 | 82.857 | 35   | 6   | 0  | 41   | 75   | 54   | 88   | 0.57      | 37.4 |
|                    | AR2_GAGATTCC-GGCTCTGA_comp1084_seq0  | 63.105 | 1301 | 353 | 34 | 31   | 1314 | 402  | 1592 | 5.37E-33  | 143  |
| TEX1 (MG873080.1)  | YS2_GAGATTCC-ATAGAGGC_comp528_seq2   | 69.342 | 1383 | 373 | 21 | 92   | 1438 | 2198 | 3565 | 9.78E-151 | 535  |
|                    | YS1_GAGATTCC-TATAGCCT_comp15820_seq1 | 69.136 | 1377 | 388 | 15 | 94   | 1438 | 298  | 1669 | 3.41E-150 | 533  |
|                    | YL1_CGCTCATT-TATAGCCT_comp104_seq6   | 69.27  | 1383 | 374 | 21 | 92   | 1438 | 2365 | 3732 | 4.16E-149 | 529  |
|                    | OL3_CGCTCATT-GGCTCTGA_comp1489_seq0  | 66.935 | 1367 | 413 | 18 | 103  | 1446 | 919  | 2269 | 1.36E-104 | 381  |
|                    | AR2_GAGATTCC-GGCTCTGA_comp863_seq0   | 66.012 | 1324 | 427 | 12 | 124  | 1431 | 314  | 1630 | 9.18E-88  | 325  |
|                    | YS2_GAGATTCC-ATAGAGGC_comp528_seq2   | 69.192 | 1373 | 394 | 15 | 103  | 1462 | 2209 | 3565 | 1.48E-148 | 527  |
|                    | YL1_CGCTCATT-TATAGCCT_comp104_seq6   | 69.119 | 1373 | 395 | 15 | 103  | 1462 | 2376 | 3732 | 1.80E-147 | 524  |
|                    | YS1_GAGATTCC-TATAGCCT_comp15820_seq1 | 67.632 | 1347 | 409 | 15 | 124  | 1455 | 328  | 1662 | 1.58E-116 | 421  |
|                    | OL3_CGCTCATT-GGCTCTGA_comp1489_seq0  | 65.852 | 1391 | 412 | 17 | 103  | 1470 | 919  | 2269 | 2.86E-94  | 347  |
| TEX2 (MG873081.1)  | AR2_GAGATTCC-GGCTCTGA_comp863_seq0   | 65.799 | 1345 | 429 | 9  | 124  | 1460 | 314  | 1635 | 4.24E-92  | 340  |
|                    | OL3_CGCTCATT-GGCTCTGA_comp1418_seq0  | 72.105 | 1520 | 382 | 16 | 1    | 1505 | 452  | 1944 | 0         | 796  |
| T19H (HQ901597.1)  | OL3_CGCTCATT-GGCTCTGA_comp12875_seq0 | 65.649 | 1278 | 401 | 21 | 97   | 1361 | 301  | 1553 | 7.56E-70  | 266  |
|                    | AR1_GAGATTCC-CCTATCCT_comp10373_seq0 | 68.027 | 294  | 92  | 2  | 1054 | 1346 | 1064 | 1356 | 6.64E-20  | 100  |
|                    | AR2_GAGATTCC-GGCTCTGA_comp863_seq0   | 73.81  | 168  | 39  | 3  | 1207 | 1370 | 1388 | 1554 | 8.09E-19  | 96.9 |
|                    | OL1_CGCTCATT-CCTATCCT_comp520_seq1   | 70.918 | 196  | 56  | 1  | 1162 | 1357 | 1433 | 1627 | 9.86E-18  | 93.3 |
|                    | AR1_GAGATTCC-CCTATCCT_comp10689_seq2 | 69.219 | 1293 | 330 | 19 | 1    | 1259 | 4    | 1262 | 2.75E-144 | 513  |
| TAT (KU821123.1)   | AR2_GAGATTCC-GGCTCTGA_comp333_seq6   | 69.438 | 1263 | 329 | 22 | 14   | 1249 | 137  | 1369 | 3.13E-137 | 489  |
|                    | AR2_GAGATTCC-GGCTCTGA_comp333_seq4   | 69.438 | 1263 | 329 | 22 | 14   | 1249 | 137  | 1369 | 3.13E-137 | 489  |
|                    | AR2_GAGATTCC-GGCTCTGA_comp1084_seq0  | 64.969 | 1276 | 351 | 31 | 13   | 1261 | 396  | 1602 | 3.83E-60  | 233  |
|                    | YS2_GAGATTCC-ATAGAGGC_comp13380_seq0 | 65.961 | 1087 | 317 | 26 | 190  | 1263 | 575  | 1621 | 6.93E-57  | 223  |
|                    | YS2_GAGATTCC-ATAGAGGC_comp13380_seq0 | 96.154 | 26   | 1   | 0  | 418  | 443  | 464  | 489  | 0.013     | 42.8 |
|                    | YS2_GAGATTCC-ATAGAGGC_comp8318_seq1  | 74.058 | 902  | 186 | 12 | 19   | 916  | 3631 | 2774 | 7.04E-159 | 562  |
|                    | YS2_GAGATTCC-ATAGAGGC_comp8318_seq1  | 81.435 | 237  | 44  | 0  | 916  | 1152 | 2478 | 2242 | 5.43E-59  | 230  |
|                    | YS2_GAGATTCC-ATAGAGGC_comp8318_seq1  | 88.889 | 108  | 12  | 0  | 1327 | 1434 | 2235 | 2128 | 2.17E-32  | 141  |
|                    | YL3_CGCTCATT-ATAGAGGC_comp5333_seq0  | 77.317 | 723  | 152 | 4  | 195  | 916  | 3124 | 2413 | 8.57E-158 | 558  |
|                    | YL3_CGCTCATT-ATAGAGGC_comp5333_seq0  | 79.032 | 372  | 65  | 3  | 1097 | 1461 | 2046 | 1681 | 1.36E-85  | 318  |
|                    | YL3_CGCTCATT-ATAGAGGC_comp5333_seq0  | 81.356 | 59   | 11  | 0  | 916  | 974  | 2117 | 2059 | 7.09E-07  | 57.2 |
|                    | YS2_GAGATTCC-ATAGAGGC_comp8318_seq2  | 75.657 | 723  | 149 | 5  | 195  | 916  | 2711 | 2015 | 3.20E-144 | 513  |
|                    | YS2_GAGATTCC-ATAGAGGC_comp8318_seq2  | 85.149 | 202  | 23  | 1  | 1327 | 1521 | 1586 | 1385 | 1.56E-59  | 232  |
|                    | YS2_GAGATTCC-ATAGAGGC_comp8318_seq2  | 81.356 | 59   | 11  | 0  | 916  | 974  | 1719 | 1661 | 7.09E-07  | 57.2 |
| V19H (MK050464.10) | YS2_GAGATTCC-ATAGAGGC_comp8318_seq2  | 78.571 | 56   | 12  | 0  | 1097 | 1152 | 1648 | 1593 | 0.000367  | 48.2 |
|                    | AR1_GAGATTCC-CCTATCCT_comp5822_seq1  | 71.865 | 622  | 161 | 7  | 868  | 1485 | 978  | 1589 | 1.66E-84  | 315  |
|                    | YS1_GAGATTCC-TATAGCCT_comp6764_seq2  | 69.771 | 698  | 183 | 10 | 805  | 1488 | 2776 | 3459 | 2.31E-76  | 288  |
|                    | AR1_GAGATTCC-CCTATCCT_comp10689_seq2 | 68.261 | 1317 | 321 | 24 | 27   | 1326 | 18   | 1254 | 2.98E-131 | 470  |
|                    | AR2_GAGATTCC-GGCTCTGA_comp333_seq6   | 66.412 | 1307 | 354 | 18 | 28   | 1326 | 142  | 1371 | 1.77E-102 | 374  |
|                    | AR2_GAGATTCC-GGCTCTGA_comp333_seq4   | 66.412 | 1307 | 354 | 18 | 28   | 1326 | 142  | 1371 | 1.77E-102 | 374  |
|                    | YS2_GAGATTCC-ATAGAGGC_comp13380_seq0 | 68.467 | 574  | 163 | 7  | 190  | 760  | 566  | 1124 | 1.89E-51  | 205  |
|                    | YS2_GAGATTCC-ATAGAGGC_comp13380_seq0 | 72.596 | 208  | 43  | 6  | 1120 | 1326 | 1415 | 1609 | 4.75E-21  | 104  |

TableS1

|                                      |                                      |             |                         |                 |                |                 |               |                         |                       |                |                 |
|--------------------------------------|--------------------------------------|-------------|-------------------------|-----------------|----------------|-----------------|---------------|-------------------------|-----------------------|----------------|-----------------|
| MAT (AF253415.1)                     | YS2_GAGATTCC-ATAGAGGC_comp13380_seq0 | 82.857      | 35                      | 6               | 0              | 38              | 72            | 54                      | 88                    | 0.58           | 37.4            |
|                                      | AR2_GAGATTCC-GGCTCTGA_comp1084_seq0  | 66.725      | 568                     | 147             | 12             | 28              | 592           | 402                     | 930                   | 8.59E-37       | 156             |
|                                      | AR2_GAGATTCC-GGCTCTGA_comp1084_seq0  | 68.722      | 227                     | 58              | 4              | 1102            | 1326          | 1377                    | 1592                  | 4.45E-15       | 84.2            |
|                                      | YL1_CGCTCATT-TATAGCCT_comp302_seq2   | 98.046      | 921                     | 18              | 0              | 49              | 969           | 157                     | 1077                  | 0              | 1581            |
|                                      | YL1_CGCTCATT-TATAGCCT_comp302_seq2   | 83.488      | 969                     | 160             | 0              | 1               | 969           | 1590                    | 2558                  | 0              | 1027            |
|                                      | AR2_GAGATTCC-GGCTCTGA_comp630_seq4   | 97.001      | 867                     | 26              | 0              | 103             | 969           | 1291                    | 2157                  | 0              | 1447            |
|                                      | YS1_GAGATTCC-TATAGCCT_comp198_seq4   | 80.997      | 863                     | 161             | 1              | 107             | 969           | 2373                    | 3232                  | 0              | 816             |
|                                      | AR1_GAGATTCC-CCTATCCT_comp3145_seq1  | 84.248      | 711                     | 97              | 3              | 159             | 866           | 1                       | 699                   | 0              | 778             |
|                                      | AR1_GAGATTCC-CCTATCCT_comp3145_seq1  | 79.048      | 105                     | 22              | 0              | 865             | 969           | 815                     | 919                   | 2.17E-17       | 91.5            |
| VmPiNMT (KC708450)                   | OL3_CGCTCATT-GGCTCTGA_comp6929_seq0  | 77.855      | 867                     | 192             | 0              | 103             | 969           | 218                     | 1084                  | 0              | 699             |
| <b>Transporters (TPs):</b>           |                                      |             |                         |                 |                |                 |               |                         |                       |                |                 |
| <b>TP</b>                            | <b>transcript</b>                    | <b>% ID</b> | <b>Alignment length</b> | <b>Mismatch</b> | <b>Gapopen</b> | <b>TP start</b> | <b>TP end</b> | <b>Transcript start</b> | <b>Transcript end</b> | <b>E-value</b> | <b>Bitscore</b> |
| NPF2.1 (KR054375.1)                  | OL3_CGCTCATT-GGCTCTGA_comp2285_seq1  | 77.333      | 1725                    | 381             | 6              | 192             | 1914          | 713                     | 2429                  | 0              | 1330            |
|                                      | OL3_CGCTCATT-GGCTCTGA_comp2285_seq1  | 87.179      | 156                     | 20              | 0              | 239             | 394           | 401                     | 556                   | 1.73E-47       | 192             |
|                                      | OL3_CGCTCATT-GGCTCTGA_comp2285_seq1  | 78.431      | 51                      | 11              | 0              | 192             | 242           | 160                     | 210                   | 0.02           | 42.8            |
|                                      | OL1_CGCTCATT-CCTATCCT_comp26741_seq0 | 76.236      | 1456                    | 337             | 3              | 459             | 1914          | 1472                    | 2918                  | 0              | 1061            |
|                                      | YL1_CGCTCATT-TATAGCCT_comp4178_seq2  | 75.326      | 1459                    | 351             | 3              | 459             | 1914          | 1452                    | 2904                  | 0              | 1003            |
|                                      | YL1_CGCTCATT-TATAGCCT_comp3070_seq2  | 77.114      | 887                     | 200             | 1              | 1031            | 1914          | 2041                    | 2927                  | 0              | 682             |
|                                      | YL1_CGCTCATT-TATAGCCT_comp3070_seq2  | 76.014      | 838                     | 195             | 2              | 202             | 1039          | 288                     | 1119                  | 1.01E-170      | 601             |
| YS2_GAGATTCC-ATAGAGGC_comp11749_seq1 | 75.369                               | 881         | 214                     | 1               | 1034           | 1914            | 1179          | 2056                    | 6.83E-173             | 609            |                 |
| NPF2.2 (KR054376.1)                  | OL3_CGCTCATT-GGCTCTGA_comp2285_seq1  | 77.493      | 1755                    | 377             | 10             | 96              | 1844          | 683                     | 2425                  | 0              | 1355            |
|                                      | OL3_CGCTCATT-GGCTCTGA_comp2285_seq1  | 83.117      | 154                     | 26              | 0              | 173             | 326           | 401                     | 554                   | 2.82E-38       | 161             |
|                                      | OL3_CGCTCATT-GGCTCTGA_comp2285_seq1  | 79.012      | 81                      | 17              | 0              | 96              | 176           | 130                     | 210                   | 1.37E-10       | 69.8            |
|                                      | OL1_CGCTCATT-CCTATCCT_comp26741_seq0 | 76.823      | 1454                    | 328             | 4              | 393             | 1846          | 1472                    | 2916                  | 0              | 1094            |
|                                      | YL1_CGCTCATT-TATAGCCT_comp4178_seq2  | 75.585      | 1454                    | 352             | 2              | 393             | 1846          | 1452                    | 2902                  | 0              | 1016            |
|                                      | YL1_CGCTCATT-TATAGCCT_comp3070_seq2  | 75.312      | 960                     | 214             | 7              | 18              | 973           | 179                     | 1119                  | 0              | 652             |
|                                      | YL1_CGCTCATT-TATAGCCT_comp3070_seq2  | 76.303      | 844                     | 200             | 0              | 965             | 1808          | 2041                    | 2884                  | 1.04E-176      | 621             |
| YS2_GAGATTCC-ATAGAGGC_comp11749_seq1 | 76.109                               | 879         | 207                     | 2               | 968            | 1846            | 1179          | 2054                    | 5.77E-180             | 632            |                 |
| NPF2.3 (KR054377.1)                  | OL3_CGCTCATT-GGCTCTGA_comp2285_seq1  | 77.803      | 1784                    | 366             | 6              | 128             | 1908          | 673                     | 2429                  | 0              | 1433            |
|                                      | OL3_CGCTCATT-GGCTCTGA_comp2285_seq1  | 84.416      | 154                     | 24              | 0              | 218             | 371           | 401                     | 554                   | 5.62E-41       | 170             |
|                                      | OL3_CGCTCATT-GGCTCTGA_comp2285_seq1  | 72.165      | 97                      | 18              | 3              | 128             | 221           | 120                     | 210                   | 0.000462       | 48.2            |
|                                      | YL1_CGCTCATT-TATAGCCT_comp4178_seq2  | 79.691      | 1423                    | 277             | 2              | 438             | 1854          | 1452                    | 2868                  | 0              | 1265            |
|                                      | OL1_CGCTCATT-CCTATCCT_comp26741_seq0 | 79.534      | 1417                    | 284             | 1              | 438             | 1854          | 1472                    | 2882                  | 0              | 1249            |
|                                      | YL1_CGCTCATT-TATAGCCT_comp3070_seq2  | 81.758      | 899                     | 152             | 3              | 1010            | 1908          | 2041                    | 2927                  | 0              | 879             |
|                                      | YL1_CGCTCATT-TATAGCCT_comp3070_seq2  | 81.229      | 911                     | 156             | 4              | 111             | 1018          | 221                     | 1119                  | 0              | 868             |
| YS2_GAGATTCC-ATAGAGGC_comp11749_seq1 | 80.048                               | 842         | 168                     | 0               | 1013           | 1854            | 1179          | 2020                    | 0                     | 762            |                 |
|                                      | OL3_CGCTCATT-GGCTCTGA_comp8789_seq0  | 82.886      | 1788                    | 291             | 6              | 1               | 1788          | 109                     | 1881                  | 0              | 1831            |
|                                      | YL3_CGCTCATT-ATAGAGGC_comp13973_seq0 | 69.693      | 1630                    | 418             | 20             | 106             | 1717          | 519                     | 2090                  | 0              | 691             |
|                                      | YL3_CGCTCATT-ATAGAGGC_comp13973_seq0 | 78.218      | 303                     | 66              | 0              | 79              | 381           | 185                     | 487                   | 6.84E-65       | 250             |
|                                      | YS2_GAGATTCC-ATAGAGGC_comp3442_seq2  | 68.611      | 1663                    | 499             | 11             | 64              | 1716          | 335                     | 1984                  | 1.23E-175      | 618             |
|                                      | AR2_GAGATTCC-GGCTCTGA_comp6824_seq0  | 68.163      | 1671                    | 492             | 11             | 55              | 1717          | 156                     | 1794                  | 9.46E-171      | 601             |

TableS1

|                     |                                      |        |      |     |    |      |      |      |      |           |      |
|---------------------|--------------------------------------|--------|------|-----|----|------|------|------|------|-----------|------|
| NPF2.4 (KR054378.1) | YL3_CGCTCATT-ATAGAGGC_comp3976_seq4  | 71.411 | 829  | 225 | 5  | 58   | 880  | 289  | 1111 | 7.78E-115 | 416  |
|                     | YL3_CGCTCATT-ATAGAGGC_comp3976_seq4  | 66.026 | 833  | 277 | 4  | 887  | 1716 | 1636 | 2465 | 4.92E-54  | 214  |
| NPF2.5 (KR054379.1) | YL3_CGCTCATT-ATAGAGGC_comp13973_seq0 | 79.799 | 1688 | 286 | 9  | 86   | 1767 | 517  | 2155 | 0         | 1516 |
|                     | YL3_CGCTCATT-ATAGAGGC_comp13973_seq0 | 87.047 | 386  | 47  | 1  | 6    | 391  | 133  | 515  | 3.98E-131 | 470  |
|                     | OL3_CGCTCATT-GGCTCTGA_comp8789_seq0  | 70.662 | 1677 | 456 | 12 | 40   | 1701 | 163  | 1818 | 0         | 785  |
|                     | YS2_GAGATTCC-ATAGAGGC_comp3442_seq2  | 69.952 | 1674 | 469 | 13 | 46   | 1705 | 335  | 1988 | 0         | 724  |
|                     | YL3_CGCTCATT-ATAGAGGC_comp3976_seq4  | 76.761 | 809  | 183 | 3  | 6    | 813  | 258  | 1062 | 2.68E-171 | 603  |
|                     | YL3_CGCTCATT-ATAGAGGC_comp3976_seq4  | 66.627 | 851  | 267 | 7  | 865  | 1705 | 1626 | 2469 | 1.22E-61  | 239  |
|                     | AR2_GAGATTCC-GGCTCTGA_comp6824_seq0  | 68.378 | 1714 | 487 | 22 | 40   | 1736 | 159  | 1834 | 1.14E-169 | 598  |
|                     | AR2_GAGATTCC-GGCTCTGA_comp6824_seq0  | 86.18  | 1780 | 231 | 2  | 1    | 1780 | 93   | 1857 | 0         | 2105 |
|                     | OL3_CGCTCATT-GGCTCTGA_comp8789_seq0  | 68.645 | 1668 | 503 | 14 | 64   | 1718 | 160  | 1820 | 7.74E-172 | 605  |
|                     | YL3_CGCTCATT-ATAGAGGC_comp13973_seq0 | 68.741 | 1398 | 393 | 12 | 113  | 1499 | 517  | 1881 | 3.29E-151 | 536  |
| NPF2.6 (KR054380.1) | YL3_CGCTCATT-ATAGAGGC_comp13973_seq0 | 74.32  | 331  | 83  | 2  | 56   | 385  | 153  | 482  | 7.28E-52  | 206  |
|                     | YS2_GAGATTCC-ATAGAGGC_comp3442_seq2  | 67.629 | 1662 | 511 | 16 | 72   | 1717 | 334  | 1984 | 2.08E-147 | 524  |
| NPF2.7 (KR054381.1) | YL1_CGCTCATT-TATAGCCT_comp5423_seq0  | 85.583 | 326  | 47  | 0  | 1    | 326  | 74   | 399  | 6.80E-103 | 376  |
|                     | YS2_GAGATTCC-ATAGAGGC_comp3442_seq2  | 86.403 | 1743 | 234 | 1  | 37   | 1779 | 308  | 2047 | 0         | 2073 |
|                     | YL3_CGCTCATT-ATAGAGGC_comp3976_seq4  | 84.802 | 908  | 135 | 1  | 872  | 1779 | 1624 | 2528 | 0         | 1014 |
|                     | YL3_CGCTCATT-ATAGAGGC_comp3976_seq4  | 84.54  | 815  | 123 | 2  | 64   | 875  | 295  | 1109 | 0         | 895  |
|                     | OL3_CGCTCATT-GGCTCTGA_comp8789_seq0  | 69.424 | 1668 | 469 | 16 | 64   | 1712 | 169  | 1814 | 0         | 673  |
|                     | YL3_CGCTCATT-ATAGAGGC_comp13973_seq0 | 68.54  | 1548 | 425 | 12 | 104  | 1640 | 517  | 2013 | 1.15E-169 | 598  |
|                     | YL3_CGCTCATT-ATAGAGGC_comp13973_seq0 | 78.246 | 285  | 62  | 0  | 64   | 348  | 170  | 454  | 1.50E-60  | 235  |
|                     | AR2_GAGATTCC-GGCTCTGA_comp6824_seq0  | 67.351 | 1657 | 503 | 12 | 63   | 1712 | 164  | 1789 | 4.88E-149 | 529  |
|                     | YS2_GAGATTCC-ATAGAGGC_comp3442_seq2  | 79.965 | 1727 | 330 | 6  | 76   | 1797 | 332  | 2047 | 0         | 1543 |
|                     | YL3_CGCTCATT-ATAGAGGC_comp3976_seq4  | 77.133 | 914  | 197 | 4  | 887  | 1797 | 1624 | 2528 | 0         | 699  |
| NPF2.8 (KR054382.1) | YL3_CGCTCATT-ATAGAGGC_comp3976_seq4  | 79.075 | 822  | 161 | 5  | 79   | 893  | 295  | 1112 | 0         | 695  |
|                     | OL3_CGCTCATT-GGCTCTGA_comp8789_seq0  | 66.707 | 1670 | 515 | 19 | 79   | 1729 | 169  | 1816 | 2.55E-127 | 457  |
|                     | YL3_CGCTCATT-ATAGAGGC_comp13973_seq0 | 66.338 | 1625 | 479 | 18 | 119  | 1729 | 517  | 2087 | 1.61E-123 | 444  |
|                     | YL3_CGCTCATT-ATAGAGGC_comp13973_seq0 | 75.09  | 277  | 67  | 2  | 88   | 363  | 179  | 454  | 2.93E-44  | 181  |
|                     | AR2_GAGATTCC-GGCTCTGA_comp6824_seq0  | 69.159 | 963  | 265 | 19 | 78   | 1027 | 164  | 1107 | 1.42E-92  | 342  |
|                     | AR2_GAGATTCC-GGCTCTGA_comp6824_seq0  | 63.089 | 382  | 126 | 3  | 1387 | 1768 | 1464 | 1830 | 1.02E-05  | 53.6 |
|                     | YL3_CGCTCATT-ATAGAGGC_comp2760_seq1  | 78.218 | 1717 | 351 | 5  | 1    | 1716 | 254  | 1948 | 0         | 1409 |
|                     | YL1_CGCTCATT-TATAGCCT_comp789_seq5   | 74.941 | 850  | 198 | 2  | 867  | 1716 | 3127 | 3961 | 1.03E-163 | 578  |
|                     | YL1_CGCTCATT-TATAGCCT_comp789_seq6   | 74.706 | 850  | 200 | 2  | 867  | 1716 | 3966 | 4800 | 5.36E-161 | 569  |
|                     | YL1_CGCTCATT-TATAGCCT_comp789_seq0   | 74.706 | 850  | 200 | 2  | 867  | 1716 | 3922 | 4756 | 5.36E-161 | 569  |
| NPF2.9 (KX372303.1) | YL1_CGCTCATT-TATAGCCT_comp28142_seq0 | 74.441 | 313  | 80  | 0  | 1404 | 1716 | 158  | 470  | 2.45E-51  | 205  |
|                     | YL1_CGCTCATT-TATAGCCT_comp28142_seq0 | 83.803 | 142  | 23  | 0  | 829  | 970  | 15   | 156  | 1.35E-35  | 152  |
|                     | YL1_CGCTCATT-TATAGCCT_comp28142_seq0 | 76     | 75   | 18  | 0  | 1642 | 1716 | 495  | 569  | 2.80E-06  | 55.4 |
|                     | AR1_GAGATTCC-CCTATCCT_comp18788_seq0 | 82.497 | 1554 | 260 | 3  | 1    | 1554 | 192  | 1733 | 0         | 1573 |
|                     | OL1_CGCTCATT-CCTATCCT_comp74_seq2    | 81.778 | 1575 | 275 | 3  | 1    | 1575 | 2257 | 3819 | 0         | 1544 |
|                     | YS1_GAGATTCC-TATAGCCT_comp122_seq0   | 81.651 | 1575 | 277 | 3  | 1    | 1575 | 1509 | 3071 | 0         | 1535 |
|                     | OL3_CGCTCATT-GGCTCTGA_comp1979_seq2  | 81.587 | 1575 | 278 | 3  | 1    | 1575 | 936  | 2498 | 0         | 1530 |



TableS1

|                                     |                                      |             |                         |                 |                |                 |               |                         |                       |                |                 |
|-------------------------------------|--------------------------------------|-------------|-------------------------|-----------------|----------------|-----------------|---------------|-------------------------|-----------------------|----------------|-----------------|
| MATE1 (KX372304.1)                  | OL1_CGCTCATT-CCTATCCT_comp7876_seq0  | 83.482      | 1235                    | 204             | 0              | 320             | 1554          | 3127                    | 4361                  | 0              | 1308            |
|                                     | YS2_GAGATTCC-ATAGAGGC_comp3345_seq1  | 82.43       | 1383                    | 237             | 3              | 112             | 1491          | 308                     | 1687                  | 0              | 1391            |
|                                     | YS2_GAGATTCC-ATAGAGGC_comp3345_seq1  | 85.714      | 35                      | 5               | 0              | 9               | 43            | 229                     | 263                   | 0.053          | 41              |
|                                     | YS1_GAGATTCC-TATAGCCT_comp124_seq0   | 82.43       | 1383                    | 237             | 3              | 112             | 1491          | 2469                    | 3848                  | 0              | 1391            |
|                                     | YS1_GAGATTCC-TATAGCCT_comp124_seq0   | 84.615      | 39                      | 6               | 0              | 5               | 43            | 2386                    | 2424                  | 0.004          | 44.6            |
|                                     | YL3_CGCTCATT-ATAGAGGC_comp598_seq6   | 82.357      | 1383                    | 238             | 3              | 112             | 1491          | 2895                    | 4274                  | 0              | 1386            |
|                                     | YL3_CGCTCATT-ATAGAGGC_comp598_seq6   | 84.615      | 39                      | 6               | 0              | 5               | 43            | 2812                    | 2850                  | 0.004          | 44.6            |
|                                     | YS2_GAGATTCC-ATAGAGGC_comp3345_seq7  | 82.357      | 1383                    | 238             | 3              | 112             | 1491          | 311                     | 1690                  | 0              | 1386            |
|                                     | YS2_GAGATTCC-ATAGAGGC_comp3345_seq7  | 85.714      | 35                      | 5               | 0              | 9               | 43            | 229                     | 263                   | 0.053          | 41              |
|                                     | AR1_GAGATTCC-CCTATCCT_comp14782_seq0 | 76.637      | 672                     | 154             | 1              | 820             | 1491          | 941                     | 1609                  | 5.66E-141      | 502             |
| MATE2 (KX372305.1)                  | AR1_GAGATTCC-CCTATCCT_comp14782_seq0 | 80          | 40                      | 8               | 0              | 320             | 359           | 441                     | 480                   | 0.65           | 37.4            |
|                                     | OL3_CGCTCATT-GGCTCTGA_comp2267_seq1  | 99.184      | 4044                    | 32              | 1              | 1               | 4044          | 1547                    | 5589                  | 0              | 7142            |
|                                     | YL1_CGCTCATT-TATAGCCT_comp818_seq3   | 78.995      | 1771                    | 372             | 0              | 2274            | 4044          | 2892                    | 4662                  | 0              | 1517            |
|                                     | YL1_CGCTCATT-TATAGCCT_comp818_seq3   | 70.379      | 2245                    | 628             | 17             | 40              | 2270          | 593                     | 2814                  | 0              | 1009            |
|                                     | YS2_GAGATTCC-ATAGAGGC_comp1760_seq0  | 71.981      | 2873                    | 768             | 17             | 40              | 2898          | 579                     | 3428                  | 0              | 1510            |
|                                     | YS2_GAGATTCC-ATAGAGGC_comp1760_seq0  | 75.32       | 859                     | 212             | 0              | 2908            | 3766          | 3815                    | 4673                  | 3.20E-168      | 594             |
|                                     | YS2_GAGATTCC-ATAGAGGC_comp1760_seq0  | 82.927      | 82                      | 14              | 0              | 3771            | 3852          | 4935                    | 5016                  | 3.93E-15       | 86              |
|                                     | YS1_GAGATTCC-TATAGCCT_comp1672_seq3  | 71.911      | 2873                    | 770             | 17             | 40              | 2898          | 608                     | 3457                  | 0              | 1501            |
|                                     | YS1_GAGATTCC-TATAGCCT_comp1672_seq3  | 75.661      | 945                     | 230             | 0              | 2908            | 3852          | 3901                    | 4845                  | 0              | 668             |
|                                     | OL1_CGCTCATT-CCTATCCT_comp1940_seq1  | 71.536      | 2252                    | 613             | 12             | 655             | 2898          | 181                     | 2412                  | 0              | 1144            |
|                                     | OL1_CGCTCATT-CCTATCCT_comp1940_seq1  | 75.443      | 790                     | 194             | 0              | 2977            | 3766          | 3027                    | 3816                  | 3.42E-155      | 551             |
|                                     | OL1_CGCTCATT-CCTATCCT_comp1940_seq1  | 81.707      | 82                      | 15              | 0              | 3771            | 3852          | 4078                    | 4159                  | 1.67E-13       | 80.6            |
| VmTPT2 (KC511773.1)                 | OL1_CGCTCATT-CCTATCCT_comp1940_seq1  | 80.263      | 76                      | 15              | 0              | 2908            | 2983          | 2853                    | 2928                  | 3.02E-10       | 69.8            |
|                                     | OL3_CGCTCATT-GGCTCTGA_comp2267_seq1  | 87.305      | 4230                    | 534             | 1              | 37              | 4266          | 1363                    | 5589                  | 0              | 5205            |
|                                     | YS2_GAGATTCC-ATAGAGGC_comp1760_seq0  | 71.399      | 2867                    | 780             | 17             | 268             | 3120          | 588                     | 3428                  | 0              | 1433            |
|                                     | YS2_GAGATTCC-ATAGAGGC_comp1760_seq0  | 75.086      | 871                     | 215             | 2              | 3119            | 3988          | 3804                    | 4673                  | 1.75E-165      | 585             |
|                                     | YS2_GAGATTCC-ATAGAGGC_comp1760_seq0  | 81.053      | 95                      | 18              | 0              | 3993            | 4087          | 4935                    | 5029                  | 9.75E-17       | 91.5            |
|                                     | YS1_GAGATTCC-TATAGCCT_comp1672_seq3  | 71.259      | 2867                    | 784             | 17             | 268             | 3120          | 617                     | 3457                  | 0              | 1415            |
|                                     | YS1_GAGATTCC-TATAGCCT_comp1672_seq3  | 75.67       | 970                     | 234             | 2              | 3119            | 4087          | 3890                    | 4858                  | 0              | 679             |
|                                     | YL1_CGCTCATT-TATAGCCT_comp818_seq3   | 77.314      | 1772                    | 400             | 2              | 2496            | 4266          | 2892                    | 4662                  | 0              | 1377            |
|                                     | YL1_CGCTCATT-TATAGCCT_comp818_seq3   | 71.251      | 2014                    | 562             | 9              | 268             | 2270          | 602                     | 2609                  | 0              | 996             |
|                                     | YL1_CGCTCATT-TATAGCCT_comp818_seq3   | 75          | 68                      | 17              | 0              | 2425            | 2492          | 2747                    | 2814                  | 0.004          | 46.4            |
|                                     | OL1_CGCTCATT-CCTATCCT_comp1940_seq1  | 71.188      | 2256                    | 617             | 15             | 874             | 3120          | 181                     | 2412                  | 0              | 1101            |
|                                     | OL1_CGCTCATT-CCTATCCT_comp1940_seq1  | 75.601      | 791                     | 191             | 2              | 3199            | 3988          | 3027                    | 3816                  | 1.26E-154      | 549             |
|                                     | OL1_CGCTCATT-CCTATCCT_comp1940_seq1  | 88.06       | 67                      | 8               | 0              | 3993            | 4059          | 4078                    | 4144                  | 4.14E-15       | 86              |
| CrTPT2 (KC511771.1)                 | OL1_CGCTCATT-CCTATCCT_comp1940_seq1  | 77.011      | 87                      | 20              | 0              | 3119            | 3205          | 2842                    | 2928                  | 1.11E-09       | 68              |
| <b>Transcription Factors (TFs):</b> |                                      |             |                         |                 |                |                 |               |                         |                       |                |                 |
| <b>TF</b>                           | <b>transcript</b>                    | <b>% ID</b> | <b>Alignment length</b> | <b>Mismatch</b> | <b>Gapopen</b> | <b>TF start</b> | <b>TF end</b> | <b>Transcript start</b> | <b>Transcript end</b> | <b>E-value</b> | <b>Bitscore</b> |
|                                     | OL3_CGCTCATT-GGCTCTGA_comp9977_seq1  | 78.509      | 228                     | 49              | 0              | 365             | 592           | 662                     | 889                   | 1.93E-47       | 190             |
|                                     | YL1_CGCTCATT-TATAGCCT_comp6621_seq0  | 74.308      | 253                     | 59              | 2              | 365             | 611           | 688                     | 940                   | 3.27E-38       | 159             |

TableS1

|                    |                                      |        |      |     |    |      |      |      |      |           |      |
|--------------------|--------------------------------------|--------|------|-----|----|------|------|------|------|-----------|------|
| ORCA2 (AJ238740.1) | YS2_GAGATTCC-ATAGAGGC_comp27339_seq0 | 74.336 | 226  | 45  | 1  | 367  | 592  | 422  | 634  | 1.39E-36  | 154  |
|                    | YS2_GAGATTCC-ATAGAGGC_comp27339_seq0 | 91.429 | 35   | 3   | 0  | 76   | 110  | 134  | 168  | 4.27E-05  | 50   |
|                    | AR2_GAGATTCC-GGCTCTGA_comp3513_seq0  | 75.568 | 176  | 43  | 0  | 376  | 551  | 496  | 671  | 2.36E-27  | 123  |
|                    | YS1_GAGATTCC-TATAGCCT_comp5858_seq0  | 73.988 | 173  | 45  | 0  | 379  | 551  | 616  | 788  | 5.19E-23  | 109  |
|                    | YL1_CGCTCATT-TATAGCCT_comp6621_seq0  | 80.669 | 269  | 49  | 1  | 1085 | 1353 | 666  | 931  | 6.95E-65  | 250  |
|                    | YL1_CGCTCATT-TATAGCCT_comp6621_seq0  | 76.316 | 76   | 18  | 0  | 837  | 912  | 124  | 199  | 8.49E-07  | 57.2 |
|                    | AR2_GAGATTCC-GGCTCTGA_comp3513_seq0  | 84.615 | 182  | 28  | 0  | 1122 | 1303 | 497  | 678  | 9.05E-51  | 203  |
|                    | OL3_CGCTCATT-GGCTCTGA_comp9977_seq1  | 78.947 | 209  | 44  | 0  | 1104 | 1312 | 656  | 864  | 1.03E-43  | 179  |
|                    | OL3_CGCTCATT-GGCTCTGA_comp9977_seq1  | 78.481 | 79   | 14  | 2  | 823  | 898  | 33   | 111  | 6.97E-08  | 60.8 |
|                    | OL3_CGCTCATT-GGCTCTGA_comp9977_seq1  | 75     | 48   | 12  | 0  | 991  | 1038 | 345  | 392  | 9.7       | 33.7 |
| ORCA3 (AJ251250.1) | AR1_GAGATTCC-CCTATCCT_comp14477_seq0 | 83.333 | 138  | 23  | 0  | 1112 | 1249 | 458  | 595  | 2.13E-33  | 145  |
|                    | AR1_GAGATTCC-CCTATCCT_comp11153_seq4 | 73.14  | 242  | 62  | 1  | 1145 | 1386 | 435  | 673  | 2.59E-32  | 141  |
| ORCA4 (KR703577.1) | YL1_CGCTCATT-TATAGCCT_comp6621_seq0  | 78.516 | 256  | 55  | 0  | 340  | 595  | 675  | 930  | 1.80E-54  | 214  |
|                    | YL1_CGCTCATT-TATAGCCT_comp6621_seq0  | 81.928 | 83   | 10  | 3  | 16   | 95   | 126  | 206  | 3.98E-12  | 73.4 |
|                    | AR2_GAGATTCC-GGCTCTGA_comp3513_seq0  | 84.066 | 182  | 29  | 0  | 365  | 546  | 497  | 678  | 1.39E-49  | 197  |
|                    | AR1_GAGATTCC-CCTATCCT_comp11153_seq4 | 77.542 | 236  | 51  | 2  | 361  | 595  | 408  | 642  | 3.72E-44  | 179  |
|                    | OL3_CGCTCATT-GGCTCTGA_comp9977_seq1  | 74.429 | 219  | 55  | 1  | 337  | 554  | 645  | 863  | 3.26E-32  | 140  |
|                    | OL3_CGCTCATT-GGCTCTGA_comp9977_seq1  | 86.667 | 60   | 8   | 0  | 19   | 78   | 55   | 114  | 3.98E-12  | 73.4 |
| ORCA5 (KR703578.1) | AR1_GAGATTCC-CCTATCCT_comp14477_seq0 | 80.142 | 141  | 28  | 0  | 355  | 495  | 458  | 598  | 5.90E-29  | 129  |
|                    | AR2_GAGATTCC-GGCTCTGA_comp3513_seq0  | 81.191 | 319  | 51  | 2  | 614  | 932  | 488  | 797  | 1.83E-81  | 304  |
|                    | AR2_GAGATTCC-GGCTCTGA_comp3513_seq0  | 78.75  | 80   | 14  | 1  | 25   | 101  | 178  | 257  | 8.33E-10  | 66.2 |
|                    | AR1_GAGATTCC-CCTATCCT_comp14477_seq0 | 81.503 | 173  | 29  | 1  | 584  | 753  | 426  | 598  | 3.31E-40  | 167  |
|                    | AR1_GAGATTCC-CCTATCCT_comp14477_seq0 | 80.723 | 83   | 10  | 1  | 25   | 101  | 146  | 228  | 1.32E-13  | 78.8 |
|                    | YL1_CGCTCATT-TATAGCCT_comp6621_seq0  | 81.437 | 167  | 31  | 0  | 631  | 797  | 708  | 874  | 1.41E-38  | 161  |
|                    | OL3_CGCTCATT-GGCTCTGA_comp9977_seq1  | 81.679 | 131  | 24  | 0  | 631  | 761  | 682  | 812  | 8.32E-29  | 129  |
| ORCA6 (MN614455.1) | YL1_CGCTCATT-TATAGCCT_comp10613_seq0 | 72.989 | 174  | 47  | 0  | 624  | 797  | 554  | 727  | 1.16E-20  | 102  |
|                    | AR2_GAGATTCC-GGCTCTGA_comp3513_seq0  | 82.162 | 185  | 33  | 0  | 271  | 455  | 487  | 671  | 7.12E-46  | 185  |
|                    | AR1_GAGATTCC-CCTATCCT_comp14477_seq0 | 80.952 | 147  | 28  | 0  | 271  | 417  | 458  | 604  | 2.66E-32  | 140  |
|                    | OL3_CGCTCATT-GGCTCTGA_comp9977_seq1  | 74.869 | 191  | 48  | 0  | 281  | 471  | 674  | 864  | 4.80E-29  | 129  |
|                    | YS1_GAGATTCC-TATAGCCT_comp5858_seq0  | 74.566 | 173  | 44  | 0  | 283  | 455  | 616  | 788  | 1.06E-24  | 114  |
|                    | YS2_GAGATTCC-ATAGAGGC_comp27339_seq0 | 70.244 | 205  | 48  | 2  | 267  | 471  | 418  | 609  | 8.13E-20  | 98.7 |
| BIS1 (KM409646.2)  | YS2_GAGATTCC-ATAGAGGC_comp27339_seq0 | 85.714 | 28   | 4   | 0  | 126  | 153  | 235  | 262  | 2.8       | 33.7 |
|                    | YL3_CGCTCATT-ATAGAGGC_comp4742_seq3  | 73.982 | 1130 | 199 | 22 | 3    | 1101 | 269  | 1334 | 0         | 699  |
|                    | AR1_GAGATTCC-CCTATCCT_comp8525_seq2  | 74.291 | 564  | 133 | 4  | 511  | 1071 | 750  | 1304 | 3.90E-97  | 356  |
|                    | AR1_GAGATTCC-CCTATCCT_comp8525_seq2  | 78.947 | 114  | 19  | 2  | 7    | 116  | 285  | 397  | 7.07E-18  | 93.3 |
|                    | OL1_CGCTCATT-CCTATCCT_comp6055_seq0  | 65.82  | 433  | 128 | 7  | 622  | 1038 | 880  | 1308 | 4.76E-20  | 100  |
|                    | AR2_GAGATTCC-GGCTCTGA_comp1597_seq3  | 78.947 | 114  | 19  | 2  | 7    | 116  | 300  | 412  | 7.07E-18  | 93.3 |
|                    | YL1_CGCTCATT-TATAGCCT_comp10816_seq0 | 93.548 | 31   | 1   | 1  | 859  | 888  | 1680 | 1650 | 0.003     | 44.6 |
|                    | AR1_GAGATTCC-CCTATCCT_comp8525_seq2  | 70.934 | 867  | 152 | 15 | 372  | 1230 | 551  | 1325 | 2.60E-125 | 450  |
|                    | AR1_GAGATTCC-CCTATCCT_comp8525_seq2  | 69.811 | 159  | 24  | 4  | 1    | 159  | 282  | 416  | 2.15E-12  | 75.2 |
|                    | YL3_CGCTCATT-ATAGAGGC_comp4742_seq3  | 71.575 | 584  | 142 | 5  | 631  | 1214 | 750  | 1309 | 2.44E-81  | 304  |

TableS1

|                    |                                      |        |      |     |    |      |      |      |      |           |      |
|--------------------|--------------------------------------|--------|------|-----|----|------|------|------|------|-----------|------|
|                    | YL3_CGCTCATT-ATAGAGGC_comp4742_seq3  | 72.857 | 70   | 7   | 3  | 9    | 78   | 275  | 332  | 0.15      | 39.2 |
|                    | OL1_CGCTCATT-CCTATCCT_comp6055_seq0  | 71.171 | 222  | 64  | 0  | 662  | 883  | 809  | 1030 | 8.54E-24  | 113  |
|                    | OL1_CGCTCATT-CCTATCCT_comp6055_seq0  | 67.485 | 163  | 53  | 0  | 1013 | 1175 | 1145 | 1307 | 2.01E-06  | 55.4 |
|                    | AR2_GAGATTCC-GGCTCTGA_comp1597_seq3  | 69.811 | 159  | 24  | 4  | 1    | 159  | 297  | 431  | 2.15E-12  | 75.2 |
|                    | AR2_GAGATTCC-GGCTCTGA_comp1597_seq3  | 76     | 100  | 15  | 3  | 372  | 468  | 566  | 659  | 3.19E-10  | 68   |
|                    | AR2_GAGATTCC-GGCTCTGA_comp1597_seq3  | 83.871 | 31   | 5   | 0  | 215  | 245  | 466  | 496  | 6.6       | 33.7 |
| BIS2 (KM409645.1)  | AR2_GAGATTCC-GGCTCTGA_comp1660_seq1  | 80.952 | 63   | 12  | 0  | 757  | 819  | 891  | 953  | 4.73E-08  | 60.8 |
|                    | OL3_CGCTCATT-GGCTCTGA_comp2316_seq0  | 80     | 1415 | 181 | 27 | 1158 | 2552 | 1441 | 2773 | 0         | 1247 |
|                    | OL1_CGCTCATT-CCTATCCT_comp4812_seq0  | 80.783 | 1353 | 191 | 24 | 1185 | 2501 | 1078 | 2397 | 0         | 1222 |
|                    | OL1_CGCTCATT-CCTATCCT_comp4812_seq0  | 70.926 | 1080 | 191 | 21 | 77   | 1076 | 8    | 1044 | 7.71E-155 | 549  |
|                    | OL1_CGCTCATT-CCTATCCT_comp2168_seq4  | 74.927 | 1029 | 181 | 18 | 77   | 1079 | 107  | 1084 | 0         | 681  |
|                    | YS1_GAGATTCC-TATAGCCT_comp2461_seq6  | 74.636 | 1029 | 184 | 18 | 77   | 1079 | 204  | 1181 | 0         | 668  |
|                    | YS1_GAGATTCC-TATAGCCT_comp14327_seq2 | 80.18  | 666  | 91  | 18 | 1895 | 2540 | 3    | 647  | 1.22E-158 | 562  |
|                    | YS1_GAGATTCC-TATAGCCT_comp14327_seq2 | 76.087 | 92   | 8   | 5  | 2261 | 2350 | 655  | 734  | 1.23E-06  | 57.2 |
| MYC2 (AF283507.2)  | YS1_GAGATTCC-TATAGCCT_comp14327_seq2 | 73.529 | 102  | 16  | 5  | 2450 | 2547 | 735  | 829  | 0.000183  | 50   |
|                    | AR1_GAGATTCC-CCTATCCT_comp24292_seq0 | 77.204 | 329  | 51  | 6  | 322  | 632  | 542  | 864  | 2.93E-65  | 250  |
|                    | YS1_GAGATTCC-TATAGCCT_comp87_seq4    | 71.498 | 414  | 85  | 8  | 30   | 425  | 154  | 552  | 8.96E-53  | 208  |
|                    | YS1_GAGATTCC-TATAGCCT_comp87_seq3    | 71.294 | 425  | 83  | 10 | 30   | 427  | 154  | 566  | 3.13E-52  | 206  |
|                    | AR1_GAGATTCC-CCTATCCT_comp16215_seq2 | 77.533 | 227  | 30  | 7  | 424  | 632  | 808  | 1031 | 2.74E-40  | 167  |
| WRKY1 (HQ646368.1) | AR2_GAGATTCC-GGCTCTGA_comp1658_seq0  | 75.771 | 227  | 31  | 6  | 424  | 632  | 3831 | 4051 | 4.96E-37  | 156  |
|                    | AR1_GAGATTCC-CCTATCCT_comp737_seq2   | 72.233 | 533  | 94  | 14 | 104  | 600  | 328  | 842  | 1.76E-74  | 280  |
|                    | AR1_GAGATTCC-CCTATCCT_comp737_seq2   | 96.97  | 33   | 1   | 0  | 70   | 102  | 267  | 299  | 1.27E-06  | 55.4 |
|                    | YL1_CGCTCATT-TATAGCCT_comp10081_seq1 | 69.458 | 203  | 56  | 2  | 206  | 405  | 179  | 378  | 2.62E-15  | 84.2 |
|                    | AR2_GAGATTCC-GGCTCTGA_comp7502_seq0  | 70.408 | 196  | 53  | 4  | 203  | 397  | 261  | 452  | 1.11E-13  | 78.8 |
|                    | AR2_GAGATTCC-GGCTCTGA_comp7502_seq2  | 68.837 | 215  | 52  | 5  | 194  | 396  | 240  | 451  | 3.89E-13  | 77   |
| ZCT1 (AJ632082.1)  | AR1_GAGATTCC-CCTATCCT_comp6246_seq5  | 78.75  | 80   | 15  | 2  | 200  | 278  | 527  | 605  | 2.99E-08  | 60.8 |
|                    | AR2_GAGATTCC-GGCTCTGA_comp7502_seq0  | 69.737 | 608  | 124 | 15 | 80   | 657  | 90   | 667  | 3.09E-66  | 253  |
|                    | AR2_GAGATTCC-GGCTCTGA_comp7502_seq0  | 73.75  | 160  | 29  | 9  | 805  | 958  | 840  | 992  | 2.09E-11  | 71.6 |
|                    | AR2_GAGATTCC-GGCTCTGA_comp7502_seq2  | 66.026 | 624  | 111 | 19 | 64   | 657  | 76   | 628  | 6.82E-43  | 176  |
|                    | AR2_GAGATTCC-GGCTCTGA_comp7502_seq2  | 71.519 | 158  | 27  | 9  | 808  | 958  | 802  | 948  | 1.32E-07  | 59   |
|                    | AR1_GAGATTCC-CCTATCCT_comp737_seq2   | 71.689 | 219  | 51  | 5  | 236  | 447  | 409  | 623  | 3.54E-21  | 104  |
|                    | AR2_GAGATTCC-GGCTCTGA_comp5665_seq0  | 80.556 | 72   | 14  | 0  | 379  | 450  | 1288 | 1359 | 2.55E-10  | 68   |
|                    | AR2_GAGATTCC-GGCTCTGA_comp5665_seq0  | 71.053 | 76   | 22  | 0  | 238  | 313  | 1096 | 1171 | 0.12      | 39.2 |
| ZCT2 (AJ632083.1)  | YL1_CGCTCATT-TATAGCCT_comp10081_seq1 | 73.737 | 99   | 26  | 0  | 214  | 312  | 145  | 243  | 1.08E-08  | 62.6 |
|                    | AR1_GAGATTCC-CCTATCCT_comp521_seq0   | 72.048 | 991  | 174 | 23 | 61   | 1023 | 171  | 1086 | 9.68E-149 | 527  |
|                    | AR2_GAGATTCC-GGCTCTGA_comp1098_seq4  | 71.287 | 1010 | 166 | 28 | 61   | 1019 | 1556 | 2492 | 1.35E-140 | 500  |
|                    | OL3_CGCTCATT-GGCTCTGA_comp7752_seq4  | 71.125 | 987  | 179 | 25 | 57   | 998  | 186  | 1111 | 4.40E-134 | 479  |
|                    | OL1_CGCTCATT-CCTATCCT_comp2136_seq4  | 69.679 | 343  | 63  | 13 | 676  | 1005 | 926  | 1240 | 9.12E-29  | 129  |
| ZCT3 (AJ632084.1)  | AR2_GAGATTCC-GGCTCTGA_comp10369_seq0 | 75.862 | 87   | 15  | 1  | 679  | 765  | 481  | 401  | 3.19E-09  | 64.4 |
|                    | YL1_CGCTCATT-TATAGCCT_comp1354_seq1  | 68.293 | 1066 | 143 | 29 | 1    | 1042 | 103  | 997  | 9.27E-124 | 444  |
|                    | YS2_GAGATTCC-ATAGAGGC_comp2064_seq8  | 67.864 | 1058 | 146 | 26 | 1    | 1042 | 2965 | 3844 | 1.68E-120 | 434  |

TableS1

|                                    |                                      |        |      |     |     |      |      |      |           |           |      |
|------------------------------------|--------------------------------------|--------|------|-----|-----|------|------|------|-----------|-----------|------|
| GATA1 (MK801106.1)                 | OL3_CGCTCATT-GGCTCTGA_comp8246_seq1  | 67.628 | 1075 | 149 | 31  | 1    | 1044 | 49   | 955       | 1.91E-113 | 410  |
|                                    | YS1_GAGATTCC-TATAGCCT_comp2284_seq2  | 68.045 | 1064 | 149 | 35  | 1    | 1042 | 119  | 1013      | 9.91E-111 | 401  |
|                                    | YS2_GAGATTCC-ATAGAGGC_comp4735_seq0  | 73.786 | 515  | 81  | 9   | 539  | 1044 | 326  | 795       | 5.14E-89  | 329  |
|                                    | YS2_GAGATTCC-ATAGAGGC_comp4735_seq0  | 91.304 | 23   | 2   | 0   | 83   | 105  | 181  | 203       | 5.5       | 33.7 |
|                                    | YS1_GAGATTCC-TATAGCCT_comp3725_seq0  | 77.524 | 1882 | 300 | 38  | 5    | 1858 | 186  | 1972      | 0         | 1427 |
|                                    | YS1_GAGATTCC-TATAGCCT_comp3725_seq0  | 100    | 19   | 0   | 0   | 1    | 19   | 168  | 186       | 2.9       | 35.6 |
|                                    | YL1_CGCTCATT-TATAGCCT_comp4560_seq1  | 80.074 | 1345 | 215 | 17  | 5    | 1320 | 130  | 1450      | 0         | 1189 |
|                                    | YL1_CGCTCATT-TATAGCCT_comp4560_seq1  | 72.176 | 478  | 66  | 20  | 1386 | 1858 | 1716 | 2131      | 5.51E-60  | 233  |
|                                    | YL1_CGCTCATT-TATAGCCT_comp4560_seq1  | 100    | 19   | 0   | 0   | 1    | 19   | 112  | 130       | 2.9       | 35.6 |
|                                    | YL1_CGCTCATT-TATAGCCT_comp4560_seq0  | 78.753 | 1219 | 199 | 12  | 6    | 1205 | 112  | 1289      | 0         | 1031 |
| GBF1 (AF084971.1)                  | YL1_CGCTCATT-TATAGCCT_comp4560_seq0  | 71.084 | 664  | 107 | 22  | 1203 | 1858 | 1393 | 1979      | 8.73E-83  | 309  |
|                                    | OL1_CGCTCATT-CCTATCCT_comp4376_seq4  | 81.124 | 694  | 116 | 2   | 621  | 1314 | 849  | 1527      | 0         | 666  |
|                                    | OL1_CGCTCATT-CCTATCCT_comp4376_seq4  | 77.671 | 627  | 98  | 10  | 6    | 613  | 125  | 728       | 3.70E-138 | 493  |
|                                    | OL1_CGCTCATT-CCTATCCT_comp4376_seq4  | 69.933 | 449  | 78  | 17  | 1380 | 1825 | 1668 | 2062      | 1.30E-42  | 176  |
|                                    | YL1_CGCTCATT-TATAGCCT_comp4162_seq2  | 75.269 | 93   | 23  | 0   | 1118 | 1210 | 1082 | 1174      | 5.90E-09  | 64.4 |
|                                    | OL3_CGCTCATT-GGCTCTGA_comp5631_seq2  | 81.358 | 1797 | 232 | 28  | 22   | 1786 | 124  | 1849      | 0         | 1698 |
|                                    | AR1_GAGATTCC-CCTATCCT_comp6026_seq0  | 83.374 | 1215 | 146 | 18  | 574  | 1769 | 706  | 1883      | 0         | 1251 |
|                                    | AR1_GAGATTCC-CCTATCCT_comp6026_seq0  | 85.985 | 264  | 32  | 2   | 355  | 618  | 398  | 656       | 1.08E-81  | 306  |
|                                    | AR1_GAGATTCC-CCTATCCT_comp6026_seq0  | 69.424 | 278  | 48  | 10  | 22   | 289  | 138  | 388       | 5.61E-22  | 107  |
|                                    | AR2_GAGATTCC-GGCTCTGA_comp6592_seq4  | 82.512 | 1258 | 152 | 21  | 574  | 1803 | 761  | 1978      | 0         | 1243 |
| GBF2 (AF084972.1)                  | AR2_GAGATTCC-GGCTCTGA_comp6592_seq4  | 77.758 | 571  | 78  | 14  | 22   | 582  | 146  | 677       | 7.27E-122 | 439  |
|                                    | YS1_GAGATTCC-TATAGCCT_comp5460_seq5  | 84.724 | 995  | 119 | 8   | 188  | 1163 | 234  | 1214      | 0         | 1103 |
|                                    | YS1_GAGATTCC-TATAGCCT_comp5460_seq5  | 80.787 | 635  | 79  | 15  | 1160 | 1786 | 2377 | 2976      | 2.08E-160 | 567  |
|                                    | YS1_GAGATTCC-TATAGCCT_comp5460_seq5  | 73.196 | 97   | 23  | 2   | 5    | 100  | 83   | 177       | 3.79E-05  | 51.8 |
|                                    | YS1_GAGATTCC-TATAGCCT_comp5460_seq5  | 81.818 | 44   | 8   | 0   | 82   | 125  | 180  | 223       | 0.006     | 44.6 |
|                                    | AR1_GAGATTCC-CCTATCCT_comp11579_seq0 | 82.381 | 840  | 109 | 15  | 866  | 1686 | 1895 | 2714      | 0         | 816  |
|                                    | AR1_GAGATTCC-CCTATCCT_comp11579_seq0 | 92.069 | 290  | 23  | 0   | 574  | 863  | 738  | 1027      | 6.81E-116 | 419  |
|                                    | AR1_GAGATTCC-CCTATCCT_comp11579_seq0 | 75.207 | 605  | 81  | 16  | 18   | 582  | 78   | 653       | 1.50E-111 | 405  |
|                                    | AR2_GAGATTCC-GGCTCTGA_comp630_seq3   | 78.341 | 651  | 78  | 11  | 385  | 1026 | 424  | 1020      | 3.62E-154 | 545  |
|                                    | AR2_GAGATTCC-GGCTCTGA_comp630_seq3   | 82.692 | 104  | 15  | 1   | 1    | 101  | 157  | 260       | 1.04E-21  | 105  |
|                                    | AR2_GAGATTCC-GGCTCTGA_comp630_seq3   | 82.051 | 78   | 14  | 0   | 236  | 313  | 323  | 400       | 1.45E-13  | 78.8 |
|                                    | AR2_GAGATTCC-GGCTCTGA_comp630_seq4   | 78.341 | 651  | 78  | 11  | 385  | 1026 | 424  | 1020      | 3.62E-154 | 545  |
|                                    | AR2_GAGATTCC-GGCTCTGA_comp630_seq4   | 82.692 | 104  | 15  | 1   | 1    | 101  | 157  | 260       | 1.04E-21  | 105  |
|                                    | AR2_GAGATTCC-GGCTCTGA_comp630_seq4   | 82.051 | 78   | 14  | 0   | 236  | 313  | 323  | 400       | 1.45E-13  | 78.8 |
|                                    | AR2_GAGATTCC-GGCTCTGA_comp630_seq1   | 78.221 | 652  | 79  | 11  | 384  | 1026 | 420  | 1017      | 1.26E-153 | 544  |
|                                    | AR2_GAGATTCC-GGCTCTGA_comp630_seq1   | 82.692 | 104  | 15  | 1   | 1    | 101  | 157  | 260       | 1.04E-21  | 105  |
|                                    | AR2_GAGATTCC-GGCTCTGA_comp630_seq1   | 80     | 95   | 19  | 0   | 236  | 330  | 323  | 417       | 9.77E-16  | 86   |
|                                    | OL1_CGCTCATT-CCTATCCT_comp1173_seq1  | 78.034 | 651  | 80  | 11  | 385  | 1026 | 483  | 1079      | 1.88E-151 | 536  |
|                                    | OL1_CGCTCATT-CCTATCCT_comp1173_seq1  | 82.692 | 104  | 15  | 1   | 1    | 101  | 219  | 322       | 1.04E-21  | 105  |
|                                    | OL1_CGCTCATT-CCTATCCT_comp1173_seq1  | 79.487 | 78   | 16  | 0   | 236  | 313  | 382  | 459       | 7.51E-11  | 69.8 |
| YL3_CGCTCATT-ATAGAGGC_comp915_seq2 | 77.914                               | 652    | 81   | 11  | 384 | 1026 | 630  | 1227 | 6.55E-151 | 535       |      |

TableS1

|                     |                                    |        |    |    |   |     |     |     |     |          |      |
|---------------------|------------------------------------|--------|----|----|---|-----|-----|-----|-----|----------|------|
| CtERF5 (MK862158.1) | YL3_CGCTCATT-ATAGAGGC_comp915_seq2 | 80.769 | 78 | 15 | 0 | 253 | 330 | 550 | 627 | 6.17E-12 | 73.4 |
|---------------------|------------------------------------|--------|----|----|---|-----|-----|-----|-----|----------|------|

TableS2

| Transcript ID                        | MIA    | Communities | sprot_Top_BLASTX_hit                                                                                                                                     |
|--------------------------------------|--------|-------------|----------------------------------------------------------------------------------------------------------------------------------------------------------|
| YS2_GAGATTCC-ATAGAGGC_comp13351_seq1 | NA     | 1           | Y3037_ARATH^Y3037_ARATH^Q:412-2247,H:43-639^42.86%ID^E:4e-128^RecName: Full=Probable inactive leucine-rich repeat receptor-like protein kinase At3g03770 |
| OL3_CGCTCATT-GGCTCTGA_comp10301_seq0 | NA     | 1           | .                                                                                                                                                        |
| YL1_CGCTCATT-TATAGCCT_comp2586_seq1  | NA     | 1           | .                                                                                                                                                        |
| YL3_CGCTCATT-ATAGAGGC_comp19793_seq1 | NA     | 1           | C86A2_ARATH^C86A2_ARATH^Q:2-346,H:409-523^75.65%ID^E:2e-53^RecName: Full=Cytochrome P450 86A2                                                            |
| YS2_GAGATTCC-ATAGAGGC_comp1135_seq0  | NA     | 1           | RL212_ARATH^RL212_ARATH^Q:27-518,H:1-164^84.76%ID^E:7e-100^RecName: Full=60S ribosomal protein L21-2                                                     |
| AR1_GAGATTCC-CCTATCCT_comp8017_seq0  | NA     | 1           | DST1_DICDI^DST1_DICDI^Q:863-1696,H:15-283^57.55%ID^E:2e-97^RecName: Full=Serine/threonine-protein kinase dst1 [ECO:0000250 UniProtKB:O61125]             |
| YL3_CGCTCATT-ATAGAGGC_comp3883_seq1  | NA     | 1           | F135B_XENLA^F135B_XENLA^Q:2876-3694,H:1102-1362^41.09%ID^E:5e-51^RecName: Full=Protein FAM135B                                                           |
| OL1_CGCTCATT-CCTATCCT_comp1577_seq4  | NA     | 1           | GLGL1_SOLTU^GLGL1_SOLTU^Q:941-2191,H:2-417^81.29%ID^E:0^RecName: Full=Glucose-1-phosphate adenyltransferase large subunit 1                              |
| YS2_GAGATTCC-ATAGAGGC_comp561_seq1   | NA     | 1           | C81F1_ARATH^C81F1_ARATH^Q:172-1560,H:39-499^40.88%ID^E:3e-118^RecName: Full=Cytochrome P450 81F1 [ECO:0000305]                                           |
| YS1_GAGATTCC-TATAGCCT_comp8849_seq1  | NA     | 1           | FDL1_ARATH^FDL1_ARATH^Q:168-1520,H:3-415^28.14%ID^E:1e-29^RecName: Full=F-box/FBD/LRR-repeat protein At1g13570                                           |
| YL3_CGCTCATT-ATAGAGGC_comp188_seq0   | NA     | 1           | BGL17_ARATH^BGL17_ARATH^Q:1932-3023,H:33-395^56.87%ID^E:4e-135^RecName: Full=Beta-glucosidase 17                                                         |
| YS1_GAGATTCC-TATAGCCT_comp2178_seq1  | NA     | 1           | .                                                                                                                                                        |
| OL1_CGCTCATT-CCTATCCT_comp2611_seq3  | NA     | 1           | .                                                                                                                                                        |
| YL3_CGCTCATT-ATAGAGGC_comp7990_seq0  | NA     | 1           | EDL17_ARATH^EDL17_ARATH^Q:114-1505,H:10-467^48.08%ID^E:1e-128^RecName: Full=Sugar transporter ERD6-like 17                                               |
| YL1_CGCTCATT-TATAGCCT_comp6895_seq1  | NA     | 1           | EAAC_ARATH^EAAC_ARATH^Q:83-1255,H:1-379^69.57%ID^E:1e-172^RecName: Full=Probable envelope ADP,ATP carrier protein, chloroplastic                         |
| AR2_GAGATTCC-GGCTCTGA_comp2954_seq0  | NA     | 1           | C71DC_CATRO^C71DC_CATRO^Q:267-1745,H:2-492^50.2%ID^E:1e-166^RecName: Full=Tabersonine 16-hydroxylase                                                     |
| YL1_CGCTCATT-TATAGCCT_comp3031_seq4  | NA     | 1           | .                                                                                                                                                        |
| YL3_CGCTCATT-ATAGAGGC_comp22491_seq0 | NA     | 1           | .                                                                                                                                                        |
| YL1_CGCTCATT-TATAGCCT_comp15661_seq0 | NA     | 1           | .                                                                                                                                                        |
| YS1_GAGATTCC-TATAGCCT_comp3802_seq2  | NA     | 1           | .                                                                                                                                                        |
| YL1_CGCTCATT-TATAGCCT_comp5672_seq0  | NA     | 1           | BH048_ARATH^BH048_ARATH^Q:632-1372,H:27-270^50.2%ID^E:3e-51^RecName: Full=Transcription factor bHLH48                                                    |
| YL1_CGCTCATT-TATAGCCT_comp3021_seq0  | NA     | 1           | .                                                                                                                                                        |
| YS2_GAGATTCC-ATAGAGGC_comp776_seq0   | PAS    | 1           | THCAS_CANSA^THCAS_CANSA^Q:197-1681,H:32-540^44.92%ID^E:1e-133^RecName: Full=Tetrahydrocannabinolic acid synthase                                         |
| YS2_GAGATTCC-ATAGAGGC_comp1760_seq0  | CrTPT2 | 1           | AB32G_ARATH^AB32G_ARATH^Q:318-3440,H:1-1043^75.84%ID^E:0^RecName: Full=ABC transporter G family member 32 [ECO:0000303 PubMed:18299247]                  |
| YL3_CGCTCATT-ATAGAGGC_comp16614_seq0 | NA     | 1           | .                                                                                                                                                        |
| OL1_CGCTCATT-CCTATCCT_comp3680_seq3  | NA     | 1           | GLGL2_SOLTU^GLGL2_SOLTU^Q:3403-5007,H:1-519^73.83%ID^E:0^RecName: Full=Glucose-1-phosphate adenyltransferase large subunit 2, chloroplastic/amyloplastic |
| YL1_CGCTCATT-TATAGCCT_comp12228_seq3 | NA     | 1           | .                                                                                                                                                        |
| YS2_GAGATTCC-ATAGAGGC_comp16202_seq0 | NA     | 1           | .                                                                                                                                                        |
| YL1_CGCTCATT-TATAGCCT_comp2644_seq3  | NA     | 1           | GPDH2_ORYSJ^GPDH2_ORYSJ^Q:731-2029,H:16-382^68.13%ID^E:0^RecName: Full=Probable glycerol-3-phosphate dehydrogenase [NAD(+)] 2, cytosolic                 |
| YS2_GAGATTCC-ATAGAGGC_comp8501_seq0  | NA     | 1           | .                                                                                                                                                        |
| YL1_CGCTCATT-TATAGCCT_comp33140_seq0 | NA     | 1           | AAE13_ARATH^AAE13_ARATH^Q:2119-3087,H:222-540^73.37%ID^E:2e-159^RecName: Full=Malonate--CoA ligase                                                       |
| OL1_CGCTCATT-CCTATCCT_comp517_seq13  | NA     | 1           | ECR_ARATH^ECR_ARATH^Q:4949-5878,H:1-310^81.29%ID^E:7e-174^.                                                                                              |
| AR2_GAGATTCC-GGCTCTGA_comp2244_seq1  | STR    | 1           | STSY_RAUSE^STSY_RAUSE^Q:58-1059,H:1-333^77.61%ID^E:3e-171^RecName: Full=Strictosidine synthase                                                           |
| YL1_CGCTCATT-TATAGCCT_comp2609_seq5  | NA     | 1           | .                                                                                                                                                        |
| OL1_CGCTCATT-CCTATCCT_comp3318_seq1  | NA     | 1           | CER1_ARATH^CER1_ARATH^Q:892-2229,H:171-620^59.87%ID^E:3e-159^RecName: Full=Protein ECERIFERUM 1                                                          |
| YL3_CGCTCATT-ATAGAGGC_comp6907_seq0  | NA     | 1           | Y1491_ARATH^Y1491_ARATH^Q:219-1655,H:21-499^78.29%ID^E:0^RecName: Full=Uncharacterized protein At1g04910                                                 |
| YS1_GAGATTCC-TATAGCCT_comp65_seq1    | NA     | 1           | MER_ERYCB^MER_ERYCB^Q:109-663,H:4-194^56.25%ID^E:7e-61^RecName: Full=Methylecgonone reductase                                                            |
| YL3_CGCTCATT-ATAGAGGC_comp3908_seq3  | NA     | 1           | CSE_ARATH^CSE_ARATH^Q:258-1172,H:23-323^31.7%ID^E:1e-41^RecName: Full=Caffeoylshikimate esterase                                                         |
| YL3_CGCTCATT-ATAGAGGC_comp1258_seq0  | SAT    | 1           | VINSY_RAUSE^VINSY_RAUSE^Q:163-1392,H:1-408^65.06%ID^E:0^RecName: Full=Vinorine synthase                                                                  |
| YS2_GAGATTCC-ATAGAGGC_comp32416_seq0 | NA     | 1           | CADH6_ORYSJ^CADH6_ORYSJ^Q:13-246,H:70-147^75.64%ID^E:5e-34^RecName: Full=Probable cinnamyl alcohol dehydrogenase 6                                       |
| YL3_CGCTCATT-ATAGAGGC_comp13569_seq0 | NA     | 1           | .                                                                                                                                                        |
| YS2_GAGATTCC-ATAGAGGC_comp3900_seq3  | NA     | 1           | FH3_ORYSJ^FH3_ORYSJ^Q:2023-3180,H:809-1205^77.58%ID^E:0^RecName: Full=Formin-like protein 3                                                              |
| YL1_CGCTCATT-TATAGCCT_comp193_seq6   | NA     | 1           | RL362_ARATH^RL362_ARATH^Q:123-452,H:1-112^80.36%ID^E:9e-49^RecName: Full=60S ribosomal protein L36-2                                                     |

TableS2

|                                      |        |   |                                                                                                                                                    |
|--------------------------------------|--------|---|----------------------------------------------------------------------------------------------------------------------------------------------------|
| YS2_GAGATTCC-ATAGAGGC_comp2915_seq1  | CMS    | 1 | ISPD_ARATH^ISPD_ARATH^Q:1565-2311,H:56-299^77.51%ID^E:1e-121^RecName: Full=2-C-methyl-D-erythritol 4-phosphate cytidylyltransferase, chloroplastic |
| YS2_GAGATTCC-ATAGAGGC_comp5426_seq0  | NA     | 1 | TRY_ARATH^TRY_ARATH^Q:78-326,H:7-87^68.67%ID^E:1e-28^RecName: Full=Transcription factor TRY                                                        |
| YL1_CGCTCATT-TATAGCCT_comp6500_seq0  | NA     | 1 | SHN2_ARATH^SHN2_ARATH^Q:172-756,H:1-189^57.36%ID^E:2e-48^RecName: Full=Ethylene-responsive transcription factor SHINE 2                            |
| YL1_CGCTCATT-TATAGCCT_comp621_seq0   | NA     | 1 | .                                                                                                                                                  |
| YS1_GAGATTCC-TATAGCCT_comp445_seq2   | DXR    | 1 | DXR_MENPI^DXR_MENPI^Q:367-1776,H:1-470^86.86%ID^E:0^RecName: Full=1-deoxy-D-xylulose 5-phosphate reductoisomerase, chloroplastic                   |
| YS1_GAGATTCC-TATAGCCT_comp24972_seq0 | SLS1   | 1 | C72A1_CATRO^C72A1_CATRO^Q:1427-2701,H:93-517^91.29%ID^E:0^RecName: Full=Secologanin synthase                                                       |
| YL1_CGCTCATT-TATAGCCT_comp14134_seq1 | NA     | 1 | .                                                                                                                                                  |
| YL1_CGCTCATT-TATAGCCT_comp15133_seq0 | NA     | 1 | GDL17_ARATH^GDL17_ARATH^Q:182-1192,H:34-370^70.21%ID^E:4e-171^RecName: Full=GDSL esterase/lipase At1g33811                                         |
| YL1_CGCTCATT-TATAGCCT_comp2275_seq4  | NA     | 1 | UBP1_NICPL^UBP1_NICPL^Q:1100-2194,H:21-384^86.89%ID^E:0^RecName: Full=Oligouridylate-binding protein 1                                             |
| YS2_GAGATTCC-ATAGAGGC_comp2920_seq0  | NA     | 1 | PPR39_ARATH^PPR39_ARATH^Q:245-658,H:69-204^39.13%ID^E:1e-35^RecName: Full=Pentatricopeptide repeat-containing protein At1g12775, mitochondrial     |
| YS2_GAGATTCC-ATAGAGGC_comp10625_seq1 | NA     | 1 | Y2921_ARATH^Y2921_ARATH^Q:31-1602,H:4-502^32%ID^E:9e-60^RecName: Full=Putative leucine-rich repeat receptor-like protein kinase At2g19210          |
| YL1_CGCTCATT-TATAGCCT_comp29020_seq2 | NA     | 1 | .                                                                                                                                                  |
| YS1_GAGATTCC-TATAGCCT_comp22171_seq0 | NA     | 1 | C81F1_ARATH^C81F1_ARATH^Q:852-1457,H:300-499^50%ID^E:1e-43^RecName: Full=Cytochrome P450 81F1 {ECO:0000305}                                        |
| YL1_CGCTCATT-TATAGCCT_comp4005_seq1  | NA     | 1 | WSD1_ARATH^WSD1_ARATH^Q:319-1278,H:61-386^27.03%ID^E:1e-26^RecName: Full=O-acyltransferase WSD1                                                    |
| YS2_GAGATTCC-ATAGAGGC_comp3651_seq3  | NA     | 1 | FHYRK_ARATH^FHYRK_ARATH^Q:1731-2336,H:178-379^81.19%ID^E:6e-110^RecName: Full=Bifunctional riboflavin kinase/FMN phosphatase                       |
| YS2_GAGATTCC-ATAGAGGC_comp3692_seq0  | NA     | 1 | SCRK6_ARATH^SCRK6_ARATH^Q:420-1502,H:28-384^81.16%ID^E:1e-177^RecName: Full=Probable fructokinase-6, chloroplastic                                 |
| YS1_GAGATTCC-TATAGCCT_comp18331_seq0 | NA     | 1 | .                                                                                                                                                  |
| YL1_CGCTCATT-TATAGCCT_comp1075_seq1  | NA     | 1 | .                                                                                                                                                  |
| YL1_CGCTCATT-TATAGCCT_comp444_seq0   | DL7H   | 1 | C72A1_CATRO^C72A1_CATRO^Q:232-1896,H:1-522^51.17%ID^E:0^RecName: Full=Secologanin synthase                                                         |
| YL3_CGCTCATT-ATAGAGGC_comp9604_seq2  | NA     | 1 | KGLT_PETHY^KGLT_PETHY^Q:231-1583,H:5-448^64.46%ID^E:0^RecName: Full=Kaempferol 3-O-beta-D-galactosyltransferase                                    |
| YL3_CGCTCATT-ATAGAGGC_comp1778_seq0  | NA     | 1 | BGAL5_ARATH^BGAL5_ARATH^Q:538-2550,H:61-731^71.83%ID^E:0^RecName: Full=Beta-galactosidase 5                                                        |
| YL3_CGCTCATT-ATAGAGGC_comp412_seq0   | NA     | 1 | RNFT2_MOUSE^RNFT2_MOUSE^Q:1847-2782,H:129-439^28.25%ID^E:1e-33^RecName: Full=RING finger and transmembrane domain-containing protein 2             |
| YS2_GAGATTCC-ATAGAGGC_comp10747_seq0 | NA     | 1 | .                                                                                                                                                  |
| YL3_CGCTCATT-ATAGAGGC_comp10883_seq2 | NA     | 1 | DOF53_ARATH^DOF53_ARATH^Q:332-622,H:59-168^58.18%ID^E:6e-30^RecName: Full=Dof zinc finger protein DOF5.3                                           |
| YL3_CGCTCATT-ATAGAGGC_comp22283_seq0 | NA     | 1 | SMT1_ARATH^SMT1_ARATH^Q:458-1018,H:149-335^78.07%ID^E:2e-106^RecName: Full=Cycloartenol-C-24-methyltransferase                                     |
| OL1_CGCTCATT-CCTATCCT_comp35745_seq0 | NA     | 1 | .                                                                                                                                                  |
| YS2_GAGATTCC-ATAGAGGC_comp1818_seq4  | NA     | 1 | IDD9_ARATH^IDD9_ARATH^Q:401-1399,H:39-365^59%ID^E:2e-95^RecName: Full=Protein indeterminate-domain 9 {ECO:0000303 PubMed:16784536}                 |
| YL1_CGCTCATT-TATAGCCT_comp2414_seq3  | NA     | 2 | CCD53_ORYSJ^CCD53_ORYSJ^Q:2149-2952,H:59-328^33.09%ID^E:8e-34^RecName: Full=Cyclin-D5-3                                                            |
| YL3_CGCTCATT-ATAGAGGC_comp25903_seq0 | NA     | 2 | .                                                                                                                                                  |
| YL1_CGCTCATT-TATAGCCT_comp5995_seq1  | NA     | 2 | RH52A_ORYSJ^RH52A_ORYSJ^Q:509-1651,H:80-474^47.73%ID^E:1e-100^RecName: Full=DEAD-box ATP-dependent RNA helicase 52A                                |
| YS1_GAGATTCC-TATAGCCT_comp17005_seq0 | NA     | 2 | PID_ARATH^PID_ARATH^Q:220-1452,H:37-438^63.55%ID^E:3e-177^RecName: Full=Protein kinase PINOID                                                      |
| YS2_GAGATTCC-ATAGAGGC_comp4578_seq8  | NA     | 2 | DPOLA_ORYSJ^DPOLA_ORYSJ^Q:1194-2783,H:295-831^67.04%ID^E:0^RecName: Full=DNA polymerase alpha catalytic subunit                                    |
| YS2_GAGATTCC-ATAGAGGC_comp7927_seq0  | NA     | 2 | .                                                                                                                                                  |
| YL3_CGCTCATT-ATAGAGGC_comp7058_seq2  | NA     | 2 | Y2182_ARATH^Y2182_ARATH^Q:931-3513,H:27-888^73.15%ID^E:0^.                                                                                         |
| YS1_GAGATTCC-TATAGCCT_comp204_seq5   | NA     | 2 | ABP20_PRUPE^ABP20_PRUPE^Q:2853-3449,H:4-202^66%ID^E:6e-77^RecName: Full=Auxin-binding protein ABP20                                                |
| YS2_GAGATTCC-ATAGAGGC_comp11930_seq0 | NA     | 2 | H1_MAIZE^H1_MAIZE^Q:289-492,H:52-119^64.71%ID^E:5e-21^RecName: Full=Histone H1                                                                     |
| YL3_CGCTCATT-ATAGAGGC_comp12994_seq0 | NA     | 2 | BGAL8_ARATH^BGAL8_ARATH^Q:171-2483,H:37-851^54.45%ID^E:0^RecName: Full=Beta-galactosidase 8                                                        |
| YS1_GAGATTCC-TATAGCCT_comp13633_seq0 | NA     | 2 | INVB_ARATH^INVB_ARATH^Q:188-1858,H:13-570^78.25%ID^E:0^RecName: Full=Probable alkaline/neutral invertase B {ECO:0000305}                           |
| YS1_GAGATTCC-TATAGCCT_comp1212_seq3  | NA     | 2 | GRF6_ORYSJ^GRF6_ORYSJ^Q:1117-1470,H:157-271^70.34%ID^E:1e-45^RecName: Full=Growth-regulating factor 6                                              |
| YS1_GAGATTCC-TATAGCCT_comp767_seq6   | NA     | 2 | .                                                                                                                                                  |
| YL3_CGCTCATT-ATAGAGGC_comp3939_seq2  | NA     | 2 | Y4374_ARATH^Y4374_ARATH^Q:908-2677,H:29-622^61.27%ID^E:0^RecName: Full=Probable inactive receptor kinase At4g23740                                 |
| OL3_CGCTCATT-GGCTCTGA_comp6787_seq2  | redox1 | 2 | NU155_ARATH^NU155_ARATH^Q:1019-5659,H:1-1464^65.74%ID^E:0^RecName: Full=Nuclear pore complex protein NUP155 {ECO:0000303 PubMed:12034489}          |
| YS1_GAGATTCC-TATAGCCT_comp10834_seq2 | NA     | 2 | XYNF1_ASPOR^XYNF1_ASPOR^Q:1037-1792,H:42-293^29.77%ID^E:2e-28^RecName: Full=Endo-1,4-beta-xylanase F1                                              |
| YS1_GAGATTCC-TATAGCCT_comp124_seq0   | NA     | 2 | LAL5_ARATH^LAL5_ARATH^Q:2436-3797,H:11-464^60.79%ID^E:8e-167^.                                                                                     |

TableS2

|                                      |         |                                                                                                                                              |
|--------------------------------------|---------|----------------------------------------------------------------------------------------------------------------------------------------------|
| YL1_CGCTCATT-TATAGCCT_comp14048_seq1 | NA      | 2 DPB_ARATH^DPB_ARATH^Q:259-624,H:104-226^53.23%ID^E:2e-32^RecName: Full=Transcription factor-like protein DPB                               |
| YS2_GAGATTCC-ATAGAGGC_comp48_seq0    | NA      | 2 CIPKC_ARATH^CIPKC_ARATH^Q:329-1636,H:20-459^78.64%ID^E:0^RecName: Full=CBL-interacting serine/threonine-protein kinase 12                  |
| YL3_CGCTCATT-ATAGAGGC_comp662_seq3   | NA      | 2 CADH6_ORYSJ^CADH6_ORYSJ^Q:95-1162,H:2-358^72.83%ID^E:1e-177^RecName: Full=Probable cinnamyl alcohol dehydrogenase 6                        |
| YS2_GAGATTCC-ATAGAGGC_comp369_seq0   | NA      | 2 RL74_ARATH^RL74_ARATH^Q:286-1023,H:1-244^79.27%ID^E:2e-130^RecName: Full=60S ribosomal protein L7-4                                        |
| YS2_GAGATTCC-ATAGAGGC_comp705_seq0   | NA      | 2 21KD_DAUCA^21KD_DAUCA^Q:736-1218,H:28-188^55.28%ID^E:1e-58^RecName: Full=21 kDa protein                                                    |
| YS1_GAGATTCC-TATAGCCT_comp11479_seq0 | NA      | 2 CMT2_ARATH^CMT2_ARATH^Q:127-813,H:726-950^53.68%ID^E:7e-116^RecName: Full=DNA (cytosine-5)-methyltransferase CMT2                          |
| YL1_CGCTCATT-TATAGCCT_comp8260_seq1  | NA      | 2 GTOMC_ORYSJ^GTOMC_ORYSJ^Q:1-264,H:136-223^55.68%ID^E:4e-24^RecName: Full=Probable tocopherol O-methyltransferase, chloroplastic            |
| YS1_GAGATTCC-TATAGCCT_comp17_seq1    | NA      | 2 TET3_ARATH^TET3_ARATH^Q:1322-2176,H:1-285^68.42%ID^E:5e-125^RecName: Full=Tetraspanin-3                                                    |
| YS2_GAGATTCC-ATAGAGGC_comp2803_seq0  | NA      | 2 Y3228_ARATH^Y3228_ARATH^Q:1273-1671,H:13-147^52.59%ID^E:3e-39^RecName: Full=PHD finger protein At3g20280                                   |
| YL1_CGCTCATT-TATAGCCT_comp616_seq1   | NA      | 2 CADH6_ORYSJ^CADH6_ORYSJ^Q:536-1603,H:2-358^72.83%ID^E:0^RecName: Full=Probable cinnamyl alcohol dehydrogenase 6                            |
| YL1_CGCTCATT-TATAGCCT_comp11114_seq0 | NA      | 2 IAA17_ARATH^IAA17_ARATH^Q:84-659,H:2-219^46.33%ID^E:3e-55^RecName: Full=Auxin-responsive protein IAA17                                     |
| AR2_GAGATTCC-GGCTCTGA_comp969_seq0   | NA      | 2 H4_SOYBN^H4_SOYBN^Q:220-453,H:22-99^100%ID^E:5e-45^RecName: Full=Histone H4                                                                |
| YL1_CGCTCATT-TATAGCCT_comp3917_seq0  | NA      | 2 Y5720_ARATH^Y5720_ARATH^Q:381-2264,H:30-666^52.15%ID^E:0^RecName: Full=Probable inactive receptor kinase At5g67200                         |
| YL1_CGCTCATT-TATAGCCT_comp3285_seq0  | NA      | 2 VIL2_ARATH^VIL2_ARATH^Q:460-2259,H:2-714^36.29%ID^E:1e-94^RecName: Full=VIN3-like protein 2                                                |
| YL3_CGCTCATT-ATAGAGGC_comp15965_seq1 | NA      | 2 .                                                                                                                                          |
| YL1_CGCTCATT-TATAGCCT_comp302_seq2   | NMT     | 2 GTOMC_ORYSJ^GTOMC_ORYSJ^Q:1698-2549,H:75-357^48.24%ID^E:3e-88^RecName: Full=Probable tocopherol O-methyltransferase, chloroplastic         |
| YS2_GAGATTCC-ATAGAGGC_comp12704_seq0 | NA      | 2 NAT1_ARATH^NAT1_ARATH^Q:327-1883,H:2-520^86.71%ID^E:0^RecName: Full=Nucleobase-ascorbate transporter 1                                     |
| YS2_GAGATTCC-ATAGAGGC_comp61_seq0    | Vm16OMT | 2 HTOMT_CATRO^HTOMT_CATRO^Q:2794-3867,H:1-355^70.28%ID^E:8e-156^RecName: Full=Tabersonine 16-O-methyltransferase                             |
| YS1_GAGATTCC-TATAGCCT_comp8503_seq3  | NA      | 2 ROGF1_ARATH^ROGF1_ARATH^Q:764-2506,H:1-548^66.55%ID^E:0^RecName: Full=Rop guanine nucleotide exchange factor 1                             |
| YL3_CGCTCATT-ATAGAGGC_comp9464_seq1  | NA      | 2 .                                                                                                                                          |
| YS2_GAGATTCC-ATAGAGGC_comp5812_seq2  | NA      | 2 LTL1_ARATH^LTL1_ARATH^Q:1690-1920,H:289-365^76.62%ID^E:8e-35^RecName: Full=GDSL esterase/lipase LTL1                                       |
| YS2_GAGATTCC-ATAGAGGC_comp21866_seq0 | NA      | 2 .                                                                                                                                          |
| AR1_GAGATTCC-CCTATCCT_comp3145_seq1  | VmPINMT | 2 GTOMC_ORYSJ^GTOMC_ORYSJ^Q:2-916,H:92-359^41.23%ID^E:4e-80^RecName: Full=Probable tocopherol O-methyltransferase, chloroplastic             |
| AR2_GAGATTCC-GGCTCTGA_comp2837_seq1  | NA      | 2 PPO1_IPOBA^PPO1_IPOBA^Q:341-1708,H:1-457^63.83%ID^E:0^RecName: Full=Polyphenol oxidase I, chloroplastic                                    |
| YS2_GAGATTCC-ATAGAGGC_comp8982_seq1  | NA      | 2 .                                                                                                                                          |
| YL3_CGCTCATT-ATAGAGGC_comp2768_seq1  | NA      | 2 .                                                                                                                                          |
| AR1_GAGATTCC-CCTATCCT_comp1782_seq4  | NA      | 2 KC1D_PONAB^KC1D_PONAB^Q:1149-2012,H:3-278^38.51%ID^E:6e-55^RecName: Full=Casein kinase I isoform delta                                     |
| YS1_GAGATTCC-TATAGCCT_comp10782_seq1 | NA      | 2 SMC5_ARATH^SMC5_ARATH^Q:281-3400,H:3-1042^62.21%ID^E:0^RecName: Full=Structural maintenance of chromosomes protein 5                       |
| YL1_CGCTCATT-TATAGCCT_comp17245_seq0 | NA      | 2 .                                                                                                                                          |
| YS2_GAGATTCC-ATAGAGGC_comp324_seq0   | TDC     | 2 DDC_CATRO^DDC_CATRO^Q:661-2163,H:1-500^88.45%ID^E:0^RecName: Full=Aromatic-L-amino-acid decarboxylase                                      |
| YL3_CGCTCATT-ATAGAGGC_comp11681_seq0 | NA      | 2 ANXD3_ARATH^ANXD3_ARATH^Q:22-975,H:1-321^57.63%ID^E:1e-129^RecName: Full=Annexin D3                                                        |
| AR1_GAGATTCC-CCTATCCT_comp386_seq2   | NA      | 2 MLO6_ARATH^MLO6_ARATH^Q:748-2376,H:5-581^59.66%ID^E:0^RecName: Full=MLO-like protein 6                                                     |
| YL1_CGCTCATT-TATAGCCT_comp12249_seq2 | NA      | 2 WAXS4_ARATH^WAXS4_ARATH^Q:215-1186,H:21-337^39.2%ID^E:6e-60^RecName: Full=Probable long-chain-alcohol O-fatty-acyltransferase 4            |
| OL1_CGCTCATT-CCTATCCT_comp6039_seq0  | NA      | 2 .                                                                                                                                          |
| YL1_CGCTCATT-TATAGCCT_comp202_seq1   | NA      | 3 RUBA_PEA^RUBA_PEA^Q:1424-3199,H:1-587^86.99%ID^E:0^RecName: Full=RuBisCO large subunit-binding protein subunit alpha, chloroplastic        |
| YS2_GAGATTCC-ATAGAGGC_comp28794_seq0 | DXS3    | 3 DXS2_ORYSJ^DXS2_ORYSJ^Q:101-811,H:12-247^75.21%ID^E:2e-115^RecName: Full=Probable 1-deoxy-D-xylulose-5-phosphate synthase 2, chloroplastic |
| YL3_CGCTCATT-ATAGAGGC_comp22045_seq0 | NA      | 3 .                                                                                                                                          |
| YS2_GAGATTCC-ATAGAGGC_comp2791_seq1  | NA      | 3 FLS2_ARATH^FLS2_ARATH^Q:110-1351,H:8-477^28.54%ID^E:2e-29^RecName: Full=LRR receptor-like serine/threonine-protein kinase FLS2             |
| YL3_CGCTCATT-ATAGAGGC_comp3100_seq5  | NA      | 3 PII2_ARATH^PII2_ARATH^Q:2363-3541,H:30-423^61.06%ID^E:2e-132^RecName: Full=Piriformospora indica-insensitive protein 2                     |
| AR1_GAGATTCC-CCTATCCT_comp25230_seq0 | NA      | 3 .                                                                                                                                          |
| YL3_CGCTCATT-ATAGAGGC_comp2756_seq3  | NA      | 3 CELF3_BOVIN^CELF3_BOVIN^Q:830-2026,H:5-439^36.61%ID^E:1e-68^RecName: Full=CUGBP Elav-like family member 3                                  |
| YL3_CGCTCATT-ATAGAGGC_comp477_seq1   | IS      | 3 IRIS_CATRO^IRIS_CATRO^Q:199-1458,H:1-388^83.33%ID^E:0^RecName: Full=Iridoid synthase                                                       |
| YS2_GAGATTCC-ATAGAGGC_comp37355_seq0 | NA      | 3 RAC1_BETVU^RAC1_BETVU^Q:900-1328,H:54-197^92.36%ID^E:5e-75^RecName: Full=Rac-like GTP-binding protein RHO1                                 |
| YL3_CGCTCATT-ATAGAGGC_comp10649_seq0 | NA      | 3 ARAK_ARATH^ARAK_ARATH^Q:617-3511,H:66-1034^72.38%ID^E:0^RecName: Full=L-arabinokinase                                                      |



TableS2

|                                      |       |   |                                                                                                                                          |
|--------------------------------------|-------|---|------------------------------------------------------------------------------------------------------------------------------------------|
| YS2_GAGATTCC-ATAGAGGC_comp2711_seq8  | NA    | 3 | LVSG_DICDI^LVSG_DICDI^Q:1856-2908,H:384-772^38.39%ID^E:4e-71^RecName: Full=Probable inactive serine/threonine-protein kinase lvsG        |
| YL1_CGCTCATT-TATAGCCT_comp5166_seq0  | NA    | 3 | .                                                                                                                                        |
| YL3_CGCTCATT-ATAGAGGC_comp3314_seq1  | NA    | 3 | Y3565_ARATH^Y3565_ARATH^Q:1642-2610,H:164-498^61.83%ID^E:1e-129^RecName: Full=Probable inactive receptor-like protein kinase At3g56050   |
| YS1_GAGATTCC-TATAGCCT_comp1665_seq2  | NA    | 3 | BLH6_ARATH^BLH6_ARATH^Q:1000-2730,H:3-494^42.76%ID^E:3e-115^RecName: Full=BEL1-like homeodomain protein 6                                |
| YL3_CGCTCATT-ATAGAGGC_comp7757_seq0  | NA    | 3 | Y5656_ARATH^Y5656_ARATH^Q:312-2372,H:1-667^56.05%ID^E:0^RecName: Full=BTB/POZ domain-containing protein At5g66560                        |
| YL1_CGCTCATT-TATAGCCT_comp9867_seq0  | NA    | 3 | CIPK1_ORYSJ^CIPK1_ORYSJ^Q:1-276,H:148-239^76.09%ID^E:7e-75^RecName: Full=CBL-interacting protein kinase 1                                |
| AR1_GAGATTCC-CCTATCCT_comp22848_seq1 | NA    | 3 | MSI4_ARATH^MSI4_ARATH^Q:65-220,H:66-117^82.69%ID^E:3e-23^RecName: Full=WD-40 repeat-containing protein MSI4                              |
| YL1_CGCTCATT-TATAGCCT_comp7173_seq1  | NA    | 3 | RABA3_ARATH^RABA3_ARATH^Q:189-842,H:23-237^71.3%ID^E:5e-103^RecName: Full=Ras-related protein RABA3                                      |
| YL1_CGCTCATT-TATAGCCT_comp6388_seq3  | NA    | 3 | PMA4_NICPL^PMA4_NICPL^Q:4708-3239,H:390-801^71.02%ID^E:0^RecName: Full=Plasma membrane ATPase 4                                          |
| YL1_CGCTCATT-TATAGCCT_comp643_seq0   | NA    | 3 | RAN3_ARATH^RAN3_ARATH^Q:79-717,H:1-213^98.12%ID^E:7e-142^RecName: Full=GTP-binding nuclear protein Ran-3                                 |
| YS1_GAGATTCC-TATAGCCT_comp264_seq2   | NA    | 3 | .                                                                                                                                        |
| AR1_GAGATTCC-CCTATCCT_comp1758_seq2  | NA    | 3 | SYT_MIMIV^SYT_MIMIV^Q:868-1755,H:57-342^44.15%ID^E:1e-72^RecName: Full=Tyrosine--tRNA ligase                                             |
| YS2_GAGATTCC-ATAGAGGC_comp6671_seq1  | NA    | 3 | NLTL2_ARATH^NLTL2_ARATH^Q:303-716,H:26-162^53.62%ID^E:2e-40^RecName: Full=Non-specific lipid-transfer protein-like protein At2g13820     |
| YS1_GAGATTCC-TATAGCCT_comp14492_seq0 | NA    | 3 | RL15_PETHY^RL15_PETHY^Q:1380-1991,H:1-204^94.61%ID^E:2e-112^RecName: Full=60S ribosomal protein L15                                      |
| AR2_GAGATTCC-GGCTCTGA_comp9401_seq0  | NA    | 3 | .                                                                                                                                        |
| YL3_CGCTCATT-ATAGAGGC_comp4742_seq3  | BIS1  | 3 | BBR_ARATH^BBR_ARATH^Q:2045-2518,H:180-335^67.09%ID^E:3e-53^RecName: Full=E3 ubiquitin ligase BIG BROTHER-related                         |
| YS2_GAGATTCC-ATAGAGGC_comp5910_seq2  | NA    | 3 | VSR1_ARATH^VSR1_ARATH^Q:2339-4132,H:22-623^77.24%ID^E:0^RecName: Full=Vacuolar-sorting receptor 1                                        |
| YL1_CGCTCATT-TATAGCCT_comp5093_seq2  | NA    | 3 | IAA14_ARATH^IAA14_ARATH^Q:352-843,H:4-151^48.8%ID^E:7e-32^RecName: Full=Auxin-responsive protein IAA14                                   |
| AR1_GAGATTCC-CCTATCCT_comp589_seq7   | G10H  | 3 | C76B6_CATRO^C76B6_CATRO^Q:1306-2784,H:1-493^86%ID^E:0^RecName: Full=Geraniol 8-hydroxylase                                               |
| AR1_GAGATTCC-CCTATCCT_comp20069_seq0 | NA    | 3 | CB4_SPIOL^CB4_SPIOL^Q:1590-1081,H:80-249^90%ID^E:1e-94^RecName: Full=Chlorophyll a-b binding protein CP24, chloroplastic                 |
| YS2_GAGATTCC-ATAGAGGC_comp10055_seq1 | NA    | 3 | .                                                                                                                                        |
| OL3_CGCTCATT-GGCTCTGA_comp7833_seq1  | NA    | 3 | POL4_DROME^POL4_DROME^Q:611-1714,H:876-1234^25.88%ID^E:6e-29^RecName: Full=Retrovirus-related Pol polyprotein from transposon 412        |
| YS2_GAGATTCC-ATAGAGGC_comp558_seq3   | DL7GT | 3 | UGT8_CATRO^UGT8_CATRO^Q:834-2273,H:3-482^88.12%ID^E:0^RecName: Full=7-deoxyloganic acid glucosyltransferase                              |
| YL1_CGCTCATT-TATAGCCT_comp20383_seq0 | NA    | 3 | .                                                                                                                                        |
| YL1_CGCTCATT-TATAGCCT_comp5868_seq1  | NA    | 3 | VAP21_ARATH^VAP21_ARATH^Q:498-1160,H:1-220^64.29%ID^E:2e-81^RecName: Full=Vesicle-associated protein 2-1                                 |
| YL1_CGCTCATT-TATAGCCT_comp7706_seq0  | NA    | 3 | .                                                                                                                                        |
| YS1_GAGATTCC-TATAGCCT_comp5831_seq1  | NA    | 3 | .                                                                                                                                        |
| YS1_GAGATTCC-TATAGCCT_comp10376_seq0 | NA    | 3 | .                                                                                                                                        |
| AR1_GAGATTCC-CCTATCCT_comp4243_seq0  | NA    | 3 | .                                                                                                                                        |
| YS2_GAGATTCC-ATAGAGGC_comp1901_seq0  | NA    | 3 | ASPG1_ARATH^ASPG1_ARATH^Q:217-1569,H:45-500^58.42%ID^E:2e-169^RecName: Full=Protein ASPARTIC PROTEASE IN GUARD CELL 1                    |
| AR1_GAGATTCC-CCTATCCT_comp3050_seq0  | THAS1 | 4 | 10HGO_CATRO^10HGO_CATRO^Q:256-1335,H:1-360^86.94%ID^E:0^RecName: Full=8-hydroxygeraniol dehydrogenase                                    |
| OL1_CGCTCATT-CCTATCCT_comp1163_seq6  | NA    | 4 | GATP3_SOLL^GATP3_SOLL^Q:1986-2429,H:370-516^80.41%ID^E:6e-74^RecName: Full=Gamma aminobutyrate transaminase 3, chloroplastic             |
| AR1_GAGATTCC-CCTATCCT_comp8371_seq0  | NA    | 4 | HIS2_ARATH^HIS2_ARATH^Q:186-1004,H:23-279^68.5%ID^E:9e-121^RecName: Full=Histidine biosynthesis bifunctional protein hisI, chloroplastic |
| AR1_GAGATTCC-CCTATCCT_comp28_seq3    | NA    | 4 | .                                                                                                                                        |
| YL3_CGCTCATT-ATAGAGGC_comp3627_seq0  | NA    | 4 | CYC6_ARATH^CYC6_ARATH^Q:474-698,H:100-174^88%ID^E:7e-45^RecName: Full=Cytochrome c6, chloroplastic {ECO:0000303 PubMed:12037572}         |
| YS1_GAGATTCC-TATAGCCT_comp8635_seq3  | NA    | 4 | .                                                                                                                                        |
| YS2_GAGATTCC-ATAGAGGC_comp8318_seq1  | T3O   | 4 | C71D7_SOLCH^C71D7_SOLCH^Q:3390-3109,H:82-182^46.53%ID^E:2e-49^RecName: Full=Cytochrome P450 71D7                                         |
| YS1_GAGATTCC-TATAGCCT_comp6764_seq2  | V19H  | 4 | HACL_ARATH^HACL_ARATH^Q:229-1950,H:1-572^79.62%ID^E:0^RecName: Full=2-hydroxyacyl-CoA lyase                                              |
| YL3_CGCTCATT-ATAGAGGC_comp14054_seq2 | NA    | 4 | .                                                                                                                                        |
| YS1_GAGATTCC-TATAGCCT_comp11712_seq2 | NA    | 4 | .                                                                                                                                        |
| AR1_GAGATTCC-CCTATCCT_comp2271_seq1  | NA    | 4 | .                                                                                                                                        |
| YL3_CGCTCATT-ATAGAGGC_comp70_seq0    | 8HG0  | 4 | ADHX_ORYSI^ADHX_ORYSI^Q:149-1249,H:8-377^44.89%ID^E:1e-92^RecName: Full=Alcohol dehydrogenase class-3                                    |
| YL3_CGCTCATT-ATAGAGGC_comp4424_seq2  | NA    | 4 | RGLG2_ARATH^RGLG2_ARATH^Q:675-1517,H:184-468^71.23%ID^E:5e-146^RecName: Full=E3 ubiquitin-protein ligase RGLG2                           |
| YS2_GAGATTCC-ATAGAGGC_comp6211_seq1  | NA    | 4 | KPRS4_SPIOL^KPRS4_SPIOL^Q:220-1173,H:1-318^87.74%ID^E:0^RecName: Full=Ribose-phosphate pyrophosphokinase 4                               |

TableS2

|                                      |       |                                                                                                                                                                             |
|--------------------------------------|-------|-----------------------------------------------------------------------------------------------------------------------------------------------------------------------------|
| YL3_CGCTCATT-ATAGAGGC_comp25807_seq0 | NA    | 4 .                                                                                                                                                                         |
| YS2_GAGATTCC-ATAGAGGC_comp1127_seq1  | NA    | 4 STIP1_ARATH^STIP1_ARATH^Q:1314-3857,H:1-841^53.51%ID^E:0^RecName: Full=Septin and tuftelin-interacting protein 1 homolog 1                                                |
| YS1_GAGATTCC-TATAGCCT_comp72982_seq0 | NA    | 4 .                                                                                                                                                                         |
| YL1_CGCTCATT-TATAGCCT_comp13722_seq1 | NA    | 4 PDPK2_ARATH^PDPK2_ARATH^Q:848-1456,H:32-234^91.13%ID^E:0^RecName: Full=3-phosphoinositide-dependent protein kinase 2                                                      |
| YS2_GAGATTCC-ATAGAGGC_comp13836_seq1 | NA    | 4 MCM9_ARATH^MCM9_ARATH^Q:917-2809,H:12-640^75.63%ID^E:0^RecName: Full=Probable DNA helicase MCM9                                                                           |
| YL1_CGCTCATT-TATAGCCT_comp1306_seq0  | NA    | 4 THO4A_ARATH^THO4A_ARATH^Q:205-741,H:1-172^59.67%ID^E:5e-44^RecName: Full=THO complex subunit 4A                                                                           |
| OL3_CGCTCATT-GGCTCTGA_comp9667_seq1  | NA    | 4 CBSX3_ARATH^CBSX3_ARATH^Q:421-885,H:16-206^51.31%ID^E:1e-51^RecName: Full=CBS domain-containing protein CBSX3, mitochondrial                                              |
| YL3_CGCTCATT-ATAGAGGC_comp14103_seq1 | NA    | 4 .                                                                                                                                                                         |
| AR1_GAGATTCC-CCTATCCT_comp4362_seq3  | NA    | 4 RP8L2_ARATH^RP8L2_ARATH^Q:996-2741,H:345-901^31.18%ID^E:1e-68^RecName: Full=Probable disease resistance RPP8-like protein 2                                               |
| OL1_CGCTCATT-CCTATCCT_comp5736_seq1  | NA    | 5 2A5B_ARATH^2A5B_ARATH^Q:711-2147,H:1-485^70.43%ID^E:0^RecName: Full=Serine/threonine protein phosphatase 2A 57 kDa regulatory subunit B' beta isoform                     |
| OL3_CGCTCATT-GGCTCTGA_comp87_seq0    | NA    | 5 GLNA2_VITVI^GLNA2_VITVI^Q:1-246,H:225-306^95.12%ID^E:2e-44^RecName: Full=Glutamine synthetase cytosolic isozyme 2                                                         |
| OL3_CGCTCATT-GGCTCTGA_comp166_seq3   | NA    | 5 .                                                                                                                                                                         |
| OL3_CGCTCATT-GGCTCTGA_comp8049_seq3  | NA    | 5 .                                                                                                                                                                         |
| OL3_CGCTCATT-GGCTCTGA_comp5964_seq3  | NA    | 5 .                                                                                                                                                                         |
| OL3_CGCTCATT-GGCTCTGA_comp3166_seq0  | NA    | 5 C71DC_CATRO^C71DC_CATRO^Q:276-1646,H:38-492^59.04%ID^E:0^RecName: Full=Tabersonine 16-hydroxylase                                                                         |
| OL3_CGCTCATT-GGCTCTGA_comp6046_seq2  | NA    | 5 .                                                                                                                                                                         |
| OL3_CGCTCATT-GGCTCTGA_comp3275_seq3  | NA    | 5 LENG8_XENLA^LENG8_XENLA^Q:1359-2120,H:515-765^47.86%ID^E:4e-66^RecName: Full=Leukocyte receptor cluster member 8 homolog                                                  |
| OL1_CGCTCATT-CCTATCCT_comp1318_seq1  | VS    | 5 HIDM_GLYEC^HIDM_GLYEC^Q:72-566,H:12-178^52.07%ID^E:2e-43^RecName: Full=2-hydroxyisoflavanone dehydratase                                                                  |
| YS1_GAGATTCC-TATAGCCT_comp1103_seq2  | NA    | 6 .                                                                                                                                                                         |
| YS1_GAGATTCC-TATAGCCT_comp6148_seq1  | NA    | 6 IDD2_ARATH^IDD2_ARATH^Q:253-624,H:1-122^76.61%ID^E:1e-62^RecName: Full=Protein indeterminate-domain 2 {ECO:0000303 PubMed:16784536}                                       |
| YL1_CGCTCATT-TATAGCCT_comp20633_seq0 | NA    | 6 Y1174_SYNP6^Y1174_SYNP6^Q:188-1219,H:2-339^55.36%ID^E:5e-100^RecName: Full=Uncharacterized lipoprotein syc1174_c                                                          |
| OL3_CGCTCATT-GGCTCTGA_comp4608_seq0  | NA    | 6 ARID5_ARATH^ARID5_ARATH^Q:1224-2120,H:131-434^66.23%ID^E:2e-121^RecName: Full=AT-rich interactive domain-containing protein 5                                             |
| AR2_GAGATTCC-GGCTCTGA_comp1085_seq1  | NA    | 6 RAB7_VIGAC^RAB7_VIGAC^Q:2089-2649,H:19-206^90.96%ID^E:5e-117^RecName: Full=Ras-related protein Rab7                                                                       |
| YS2_GAGATTCC-ATAGAGGC_comp11931_seq1 | NA    | 6 YNB1_YEAST^YNB1_YEAST^Q:499-1446,H:51-417^31.84%ID^E:2e-47^RecName: Full=Uncharacterized protein YNL011C                                                                  |
| OL3_CGCTCATT-GGCTCTGA_comp5315_seq0  | NA    | 6 TOC34_PEA^TOC34_PEA^Q:691-1266,H:111-301^65.1%ID^E:6e-79^RecName: Full=Translocase of chloroplast 34                                                                      |
| AR1_GAGATTCC-CCTATCCT_comp2374_seq0  | NA    | 6 CLPP6_ARATH^CLPP6_ARATH^Q:485-1204,H:38-271^77.92%ID^E:1e-120^RecName: Full=ATP-dependent Clp protease proteolytic subunit 6, chloroplastic {ECO:0000303 PubMed:11299370} |
| OL3_CGCTCATT-GGCTCTGA_comp8459_seq0  | NA    | 6 ARFH_ARATH^ARFH_ARATH^Q:582-2246,H:185-773^61.59%ID^E:0^RecName: Full=Auxin response factor 8                                                                             |
| YS2_GAGATTCC-ATAGAGGC_comp3776_seq2  | NA    | 6 CSP1_ARATH^CSP1_ARATH^Q:331-1200,H:6-299^43.56%ID^E:9e-32^RecName: Full=Cold shock protein 1                                                                              |
| OL1_CGCTCATT-CCTATCCT_comp4311_seq2  | NA    | 6 .                                                                                                                                                                         |
| OL3_CGCTCATT-GGCTCTGA_comp9977_seq1  | ORCA2 | 6 ERF99_ARATH^ERF99_ARATH^Q:673-903,H:91-168^73.08%ID^E:2e-33^RecName: Full=Ethylene-responsive transcription factor 13                                                     |
| AR1_GAGATTCC-CCTATCCT_comp3443_seq0  | NA    | 7 F3PH_ARATH^F3PH_ARATH^Q:174-1706,H:1-508^39.96%ID^E:4e-121^RecName: Full=Flavonoid 3'-monooxygenase                                                                       |
| AR1_GAGATTCC-CCTATCCT_comp76_seq2    | NA    | 7 E13B_WHEAT^E13B_WHEAT^Q:367-1611,H:26-453^45.92%ID^E:9e-123^RecName: Full=Glucan endo-1,3-beta-glucosidase                                                                |
| AR2_GAGATTCC-GGCTCTGA_comp7052_seq0  | NA    | 7 ANX4_FRAAN^ANX4_FRAAN^Q:82-1017,H:1-314^64.97%ID^E:9e-146^RecName: Full=Annexin-like protein RJ4                                                                          |
| AR2_GAGATTCC-GGCTCTGA_comp35_seq9    | NA    | 7 C72A1_CATRO^C72A1_CATRO^Q:667-2238,H:1-524^90.84%ID^E:0^RecName: Full=Secologanin synthase                                                                                |
| YS1_GAGATTCC-TATAGCCT_comp9360_seq0  | NA    | 7 LHTL6_ARATH^LHTL6_ARATH^Q:336-1577,H:19-432^72.95%ID^E:0^RecName: Full=Lysine histidine transporter-like 6                                                                |
| AR1_GAGATTCC-CCTATCCT_comp15336_seq0 | NA    | 7 AKT1_ARATH^AKT1_ARATH^Q:195-2792,H:7-857^67.97%ID^E:0^RecName: Full=Potassium channel AKT1                                                                                |
| AR1_GAGATTCC-CCTATCCT_comp902_seq1   | NA    | 7 AL3H1_ARATH^AL3H1_ARATH^Q:3199-3702,H:191-358^72.02%ID^E:2e-74^RecName: Full=Aldehyde dehydrogenase family 3 member H1                                                    |
| AR1_GAGATTCC-CCTATCCT_comp7406_seq5  | NA    | 7 IDD2_ARATH^IDD2_ARATH^Q:585-2090,H:1-447^52.38%ID^E:5e-124^RecName: Full=Protein indeterminate-domain 2 {ECO:0000303 PubMed:16784536}                                     |
| YL1_CGCTCATT-TATAGCCT_comp695_seq0   | GES   | 7 GERS_OCIBA^GERS_OCIBA^Q:288-1925,H:31-566^63.39%ID^E:0^RecName: Full=Geraniol synthase, chloroplastic                                                                     |
| YL3_CGCTCATT-ATAGAGGC_comp24426_seq0 | NA    | 8 NCPR_CATRO^NCPR_CATRO^Q:239-880,H:501-714^91.59%ID^E:2e-138^RecName: Full=NADPH--cytochrome P450 reductase {ECO:0000255 HAMAP-Rule:MF_03212}                              |
| OL3_CGCTCATT-GGCTCTGA_comp2316_seq0  | MYC2  | 8 SYY_PARUW^SYY_PARUW^Q:1-1062,H:70-422^52.82%ID^E:1e-120^RecName: Full=Tyrosine--tRNA ligase {ECO:0000255 HAMAP-Rule:MF_02006}                                             |
| YL1_CGCTCATT-TATAGCCT_comp28191_seq0 | NA    | 8 .                                                                                                                                                                         |
| YL1_CGCTCATT-TATAGCCT_comp5601_seq1  | NA    | 8 .                                                                                                                                                                         |
| YL1_CGCTCATT-TATAGCCT_comp19800_seq0 | NA    | 8 .                                                                                                                                                                         |

TableS2

|                                      |       |    |                                                                                                                                           |
|--------------------------------------|-------|----|-------------------------------------------------------------------------------------------------------------------------------------------|
| YL1_CGCTCATT-TATAGCCT_comp1884_seq0  | NA    | 8  | RETOL_ARATH^RETOL_ARATH^Q:403-1920,H:32-536^59.33%ID^E:0^RecName: Full=Reticuline oxidase-like protein                                    |
| AR1_GAGATTCC-CCTATCCT_comp34936_seq0 | NA    | 8  | .                                                                                                                                         |
| YL1_CGCTCATT-TATAGCCT_comp10398_seq1 | NA    | 8  | .                                                                                                                                         |
| OL1_CGCTCATT-CCTATCCT_comp10937_seq0 | NA    | 8  | CIPKB_ARATH^CIPKB_ARATH^Q:302-1267,H:95-421^57.88%ID^E:2e-118^RecName: Full=CBL-interacting serine/threonine-protein kinase 11            |
| OL3_CGCTCATT-GGCTCTGA_comp34446_seq0 | NA    | 8  | .                                                                                                                                         |
| YS2_GAGATTCC-ATAGAGGC_comp4455_seq0  | NA    | 9  | .                                                                                                                                         |
| YS1_GAGATTCC-TATAGCCT_comp18356_seq0 | NA    | 9  | .                                                                                                                                         |
| YL1_CGCTCATT-TATAGCCT_comp10613_seq0 | ORCA5 | 9  | EF106_ARATH^EF106_ARATH^Q:111-797,H:1-190^38.43%ID^E:8e-26^RecName: Full=Ethylene-responsive transcription factor ERF106                  |
| YS1_GAGATTCC-TATAGCCT_comp14430_seq1 | NA    | 9  | .                                                                                                                                         |
| YS1_GAGATTCC-TATAGCCT_comp9517_seq0  | NA    | 9  | EB1C_ARATH^EB1C_ARATH^Q:515-898,H:215-328^49.62%ID^E:2e-26^RecName: Full=Microtubule-associated protein RP/EB family member 1C            |
| YS1_GAGATTCC-TATAGCCT_comp9328_seq0  | NA    | 9  | TBL34_ARATH^TBL34_ARATH^Q:661-1365,H:171-405^53.62%ID^E:1e-107^RecName: Full=Protein trichome birefringence-like 34                       |
| YL1_CGCTCATT-TATAGCCT_comp6908_seq3  | NA    | 9  | .                                                                                                                                         |
| YS2_GAGATTCC-ATAGAGGC_comp6201_seq1  | NA    | 9  | .                                                                                                                                         |
| YS2_GAGATTCC-ATAGAGGC_comp92_seq2    | NA    | 9  | MYO2_ARATH^MYO2_ARATH^Q:4807-6198,H:647-1116^53.24%ID^E:5e-150^RecName: Full=Myosin-2                                                     |
| YS2_GAGATTCC-ATAGAGGC_comp1198_seq1  | NA    | 9  | .                                                                                                                                         |
| YL1_CGCTCATT-TATAGCCT_comp9896_seq0  | NA    | 9  | .                                                                                                                                         |
| YL3_CGCTCATT-ATAGAGGC_comp2341_seq2  | NA    | 9  | MTDH_FRAAN^MTDH_FRAAN^Q:2520-3485,H:35-356^67.7%ID^E:5e-139^RecName: Full=Probable mannitol dehydrogenase                                 |
| YL3_CGCTCATT-ATAGAGGC_comp166_seq2   | CS    | 9  | HIDH_SOYBN^HIDH_SOYBN^Q:302-1240,H:4-318^48.91%ID^E:3e-93^RecName: Full=2-hydroxyisoflavanone dehydratase                                 |
| YL1_CGCTCATT-TATAGCCT_comp27681_seq0 | NA    | 9  | .                                                                                                                                         |
| AR1_GAGATTCC-CCTATCCT_comp1435_seq3  | NA    | 9  | RAC5_ORYSJ^RAC5_ORYSJ^Q:234-755,H:1-174^94.25%ID^E:5e-117^RecName: Full=Rac-like GTP-binding protein 5                                    |
| YL1_CGCTCATT-TATAGCCT_comp11923_seq3 | NA    | 9  | ASPM_SHEEP^ASPM_SHEEP^Q:867-3644,H:702-1662^24.78%ID^E:7e-52^RecName: Full=Abnormal spindle-like microcephaly-associated protein homolog  |
| YL3_CGCTCATT-ATAGAGGC_comp4884_seq0  | NA    | 9  | .                                                                                                                                         |
| YS1_GAGATTCC-TATAGCCT_comp37971_seq0 | NA    | 9  | .                                                                                                                                         |
| YS1_GAGATTCC-TATAGCCT_comp15581_seq0 | NA    | 9  | .                                                                                                                                         |
| YL1_CGCTCATT-TATAGCCT_comp6685_seq0  | NA    | 9  | .                                                                                                                                         |
| YL3_CGCTCATT-ATAGAGGC_comp55552_seq0 | NA    | 9  | .                                                                                                                                         |
| OL1_CGCTCATT-CCTATCCT_comp11695_seq0 | NA    | 10 | .                                                                                                                                         |
| YS2_GAGATTCC-ATAGAGGC_comp15556_seq7 | NA    | 10 | CASTO_LOTJA^CASTO_LOTJA^Q:660-2075,H:90-565^75.68%ID^E:0^RecName: Full=Ion channel CASTOR                                                 |
| AR2_GAGATTCC-GGCTCTGA_comp1876_seq1  | NA    | 10 | ARP9_ORYSI^ARP9_ORYSI^Q:6424-8193,H:1-586^62.86%ID^E:0^RecName: Full=Actin-related protein 9                                              |
| OL1_CGCTCATT-CCTATCCT_comp55598_seq0 | NA    | 10 | PP2A2_ARATH^PP2A2_ARATH^Q:425-973,H:124-306^96.72%ID^E:3e-129^RecName: Full=Serine/threonine-protein phosphatase PP2A-2 catalytic subunit |
| OL1_CGCTCATT-CCTATCCT_comp58112_seq0 | NA    | 10 | .                                                                                                                                         |
| YL1_CGCTCATT-TATAGCCT_comp32410_seq0 | NA    | 10 | .                                                                                                                                         |
| YS2_GAGATTCC-ATAGAGGC_comp14565_seq0 | NA    | 10 | .                                                                                                                                         |
| AR1_GAGATTCC-CCTATCCT_comp331_seq0   | NA    | 10 | .                                                                                                                                         |
| YL3_CGCTCATT-ATAGAGGC_comp13576_seq1 | NA    | 10 | C3H3_ARATH^C3H3_ARATH^Q:242-1228,H:23-338^45.72%ID^E:1e-77^RecName: Full=Zinc finger CCCH domain-containing protein 3                     |
| YS2_GAGATTCC-ATAGAGGC_comp805_seq0   | NA    | 10 | GGAP1_ARATH^GGAP1_ARATH^Q:704-1879,H:1-387^76.53%ID^E:0^RecName: Full=GDP-L-galactose phosphorylase 1                                     |
| YS1_GAGATTCC-TATAGCCT_comp7766_seq6  | NA    | 10 | CMBL_HUMAN^CMBL_HUMAN^Q:655-1227,H:28-217^30.96%ID^E:1e-22^RecName: Full=Carboxymethylenebutenolidase homolog                             |
| YS2_GAGATTCC-ATAGAGGC_comp38970_seq0 | NA    | 10 | .                                                                                                                                         |
| AR1_GAGATTCC-CCTATCCT_comp1158_seq0  | IDI1  | 10 | IDI1_CAMAC^IDI1_CAMAC^Q:315-1016,H:1-234^89.32%ID^E:4e-153^RecName: Full=Isopentenyl-diphosphate Delta-isomerase I                        |
| YL3_CGCTCATT-ATAGAGGC_comp6028_seq1  | NA    | 10 | .                                                                                                                                         |
| YL3_CGCTCATT-ATAGAGGC_comp4093_seq1  | NA    | 10 | .                                                                                                                                         |
| YS2_GAGATTCC-ATAGAGGC_comp38763_seq0 | NA    | 10 | .                                                                                                                                         |
| OL1_CGCTCATT-CCTATCCT_comp3640_seq0  | THAS2 | 10 | 10HGO_CATRO^10HGO_CATRO^Q:196-1302,H:4-360^58.54%ID^E:8e-134^RecName: Full=8-hydroxygeraniol dehydrogenase                                |
| YS2_GAGATTCC-ATAGAGGC_comp48268_seq0 | NA    | 10 | .                                                                                                                                         |

TableS2

|                                      |       |                                                                                                                                           |
|--------------------------------------|-------|-------------------------------------------------------------------------------------------------------------------------------------------|
| YS2_GAGATTCC-ATAGAGGC_comp2162_seq0  | NA    | 10 .                                                                                                                                      |
| YS1_GAGATTCC-TATAGCCT_comp57747_seq0 | NA    | 10 CID9_ARATH^CID9_ARATH^Q:5-406,H:118-251^79.85%ID^E:3e-79^RecName: Full=Polyadenylate-binding protein-interacting protein 9             |
| YS2_GAGATTCC-ATAGAGGC_comp39036_seq0 | NA    | 10 .                                                                                                                                      |
| YS2_GAGATTCC-ATAGAGGC_comp12232_seq0 | NA    | 10 .                                                                                                                                      |
| YL3_CGCTCATT-ATAGAGGC_comp33457_seq0 | NA    | 10 .                                                                                                                                      |
| AR1_GAGATTCC-CCTATCCT_comp4203_seq9  | NA    | 10 UGPA_HORVU^UGPA_HORVU^Q:2-268,H:104-192^87.64%ID^E:1e-44^RecName: Full=UTP--glucose-1-phosphate uridylyltransferase                    |
| YS2_GAGATTCC-ATAGAGGC_comp1795_seq5  | NA    | 10 .                                                                                                                                      |
| YS2_GAGATTCC-ATAGAGGC_comp33887_seq0 | NA    | 10 .                                                                                                                                      |
| YS2_GAGATTCC-ATAGAGGC_comp5239_seq2  | NA    | 10 .                                                                                                                                      |
| OL1_CGCTCATT-CCTATCCT_comp2934_seq3  | NA    | 11 P2C52_ARATH^P2C52_ARATH^Q:1685-3094,H:1-467^73.68%ID^E:0^RecName: Full=Probable protein phosphatase 2C 52                              |
| YS2_GAGATTCC-ATAGAGGC_comp1245_seq0  | NA    | 11 GAI_SOLLCA^GAI_SOLLCA^Q:423-2090,H:26-588^67.47%ID^E:0^RecName: Full=DELLA protein GAI                                                 |
| YL1_CGCTCATT-TATAGCCT_comp2035_seq0  | NA    | 11 SDC1_ORYSJ^SDC1_ORYSJ^Q:1806-2429,H:274-481^62.02%ID^E:4e-88^RecName: Full=Serine decarboxylase 1                                      |
| YS2_GAGATTCC-ATAGAGGC_comp6216_seq0  | NA    | 11 PAS1_ARATH^PAS1_ARATH^Q:289-1812,H:1-460^65.94%ID^E:0^RecName: Full=Peptidyl-prolyl cis-trans isomerase PASTICCINO1                    |
| YS1_GAGATTCC-TATAGCCT_comp8724_seq0  | NA    | 11 YQK1_SCHPO^YQK1_SCHPO^Q:82-999,H:3-303^33.23%ID^E:4e-35^RecName: Full=UPF0676 protein C1494.01                                         |
| YS1_GAGATTCC-TATAGCCT_comp6147_seq0  | NA    | 11 .                                                                                                                                      |
| YL3_CGCTCATT-ATAGAGGC_comp3510_seq4  | NA    | 11 Y1461_ARATH^Y1461_ARATH^Q:849-2270,H:88-565^69.85%ID^E:0^RecName: Full=Probable serine/threonine-protein kinase At1g54610              |
| YL3_CGCTCATT-ATAGAGGC_comp5404_seq1  | NA    | 11 BP73_ORYSJ^BP73_ORYSJ^Q:359-1318,H:30-372^40.23%ID^E:1e-50^RecName: Full=SAP-like protein BP-73                                        |
| YL1_CGCTCATT-TATAGCCT_comp11035_seq1 | NA    | 11 Y1491_ARATH^Y1491_ARATH^Q:480-1850,H:44-483^35.64%ID^E:6e-73^RecName: Full=Uncharacterized protein At1g04910                           |
| YL1_CGCTCATT-TATAGCCT_comp24563_seq0 | NA    | 11 .                                                                                                                                      |
| OL1_CGCTCATT-CCTATCCT_comp1051_seq1  | NA    | 11 LGUL_CICAR^LGUL_CICAR^Q:878-1276,H:54-186^80.45%ID^E:3e-73^RecName: Full=Lactoylglutathione lyase                                      |
| YL1_CGCTCATT-TATAGCCT_comp9848_seq1  | NA    | 11 .                                                                                                                                      |
| YL3_CGCTCATT-ATAGAGGC_comp2061_seq2  | NA    | 11 ICE1_ARATH^ICE1_ARATH^Q:966-2189,H:115-494^51.91%ID^E:5e-102^RecName: Full=Transcription factor ICE1                                   |
| YL3_CGCTCATT-ATAGAGGC_comp16753_seq0 | NA    | 11 .                                                                                                                                      |
| YS1_GAGATTCC-TATAGCCT_comp5053_seq1  | NA    | 11 .                                                                                                                                      |
| YL1_CGCTCATT-TATAGCCT_comp3439_seq2  | NA    | 11 Y5133_ARATH^Y5133_ARATH^Q:1686-3032,H:10-458^60.84%ID^E:0^RecName: Full=BTB/POZ domain-containing protein At5g41330                    |
| OL1_CGCTCATT-CCTATCCT_comp2674_seq2  | NA    | 11 SUBL_ARATH^SUBL_ARATH^Q:289-2580,H:22-755^52.8%ID^E:0^.                                                                                |
| YL1_CGCTCATT-TATAGCCT_comp12940_seq0 | NA    | 11 CDA7L_HUMAN^CDA7L_HUMAN^Q:639-935,H:343-443^50.5%ID^E:5e-26^RecName: Full=Cell division cycle-associated 7-like protein                |
| YS1_GAGATTCC-TATAGCCT_comp15918_seq0 | NA    | 11 .                                                                                                                                      |
| OL3_CGCTCATT-GGCTCTGA_comp157_seq6   | NA    | 11 COL2_ARATH^COL2_ARATH^Q:3619-4866,H:1-347^47.49%ID^E:2e-91^RecName: Full=Zinc finger protein CONSTANS-LIKE 2                           |
| YS2_GAGATTCC-ATAGAGGC_comp20_seq11   | NA    | 11 URH2_ARATH^URH2_ARATH^Q:394-1278,H:6-282^72.88%ID^E:6e-143^RecName: Full=Probable uridine nucleosidase 2                               |
| YL1_CGCTCATT-TATAGCCT_comp255_seq0   | SGD   | 11 SG1_RAUSE^SG1_RAUSE^Q:1583-3088,H:32-532^82.7%ID^E:0^RecName: Full=Strictosidine-O-beta-D-glucosidase                                  |
| YS2_GAGATTCC-ATAGAGGC_comp528_seq2   | T16H1 | 11 C71DC_CATRO^C71DC_CATRO^Q:2140-3633,H:1-493^74.8%ID^E:0^RecName: Full=Tabersonine 16-hydroxylase                                       |
| YS1_GAGATTCC-TATAGCCT_comp5427_seq0  | NA    | 11 .                                                                                                                                      |
| OL3_CGCTCATT-GGCTCTGA_comp2293_seq2  | NA    | 12 IPPK_ARATH^IPPK_ARATH^Q:1032-2057,H:104-441^56.43%ID^E:8e-113^RecName: Full=Inositol-pentakisphosphate 2-kinase                        |
| YS1_GAGATTCC-TATAGCCT_comp5896_seq1  | NA    | 12 .                                                                                                                                      |
| YL3_CGCTCATT-ATAGAGGC_comp3968_seq5  | NA    | 12 PDS5B_MOUSE^PDS5B_MOUSE^Q:708-3425,H:161-1075^23.32%ID^E:1e-48^RecName: Full=Sister chromatid cohesion protein PDS5 homolog B          |
| YL1_CGCTCATT-TATAGCCT_comp53601_seq0 | NA    | 12 RUXG_ARATH^RUXG_ARATH^Q:150-386,H:1-79^94.94%ID^E:1e-45^RecName: Full=Probable small nuclear ribonucleoprotein G                       |
| YS2_GAGATTCC-ATAGAGGC_comp1805_seq0  | NA    | 12 PLSP1_ARATH^PLSP1_ARATH^Q:457-1044,H:96-291^77.04%ID^E:4e-106^RecName: Full=Chloroplast processing peptidase                           |
| YL1_CGCTCATT-TATAGCCT_comp1491_seq4  | DXS2  | 12 DXS2_ORYSJ^DXS2_ORYSJ^Q:147-2255,H:12-712^81.56%ID^E:0^RecName: Full=Probable 1-deoxy-D-xylulose-5-phosphate synthase 2, chloroplastic |
| YL1_CGCTCATT-TATAGCCT_comp20888_seq0 | NA    | 12 .                                                                                                                                      |
| YL1_CGCTCATT-TATAGCCT_comp3346_seq5  | NA    | 12 PUB6_ARATH^PUB6_ARATH^Q:588-1658,H:7-381^38.32%ID^E:7e-71^RecName: Full=U-box domain-containing protein 6                              |
| YL1_CGCTCATT-TATAGCCT_comp13745_seq0 | NA    | 12 .                                                                                                                                      |
| YS2_GAGATTCC-ATAGAGGC_comp75153_seq0 | NA    | 13 .                                                                                                                                      |
| YL1_CGCTCATT-TATAGCCT_comp5567_seq1  | NA    | 13 SIPL1_ARATH^SIPL1_ARATH^Q:240-1358,H:1-372^76.68%ID^E:0^RecName: Full=Signal peptide peptidase-like 1                                  |

TableS2

|                                      |        |                                                                                                                                                        |
|--------------------------------------|--------|--------------------------------------------------------------------------------------------------------------------------------------------------------|
| YL3_CGCTCATT-ATAGAGGC_comp2760_seq1  | NPF2.9 | 13 PTR37_ARATH^PTR37_ARATH^Q:293-1912,H:22-548^43.38%ID^E:9e-167^RecName: Full=Protein NRT1/ PTR FAMILY 2.7                                            |
| YS2_GAGATTCC-ATAGAGGC_comp150_seq7   | NA     | 13 Y1745_ARATH^Y1745_ARATH^Q:750-1634,H:8-285^35.64%ID^E:7e-32^RecName: Full=Uncharacterized protein At1g51745                                         |
| OL1_CGCTCATT-CCTATCCT_comp6197_seq0  | NA     | 13 ARFA_ARATH^ARFA_ARATH^Q:2-556,H:308-497^48.24%ID^E:8e-37^RecName: Full=Auxin response factor 1                                                      |
| YS2_GAGATTCC-ATAGAGGC_comp6043_seq1  | NA     | 13 SKIP5_ARATH^SKIP5_ARATH^Q:2142-2537,H:130-273^61.81%ID^E:2e-50^RecName: Full=F-box protein SKIP5                                                    |
| YS2_GAGATTCC-ATAGAGGC_comp9205_seq0  | NA     | 13 .                                                                                                                                                   |
| YS2_GAGATTCC-ATAGAGGC_comp14379_seq0 | NA     | 13 H2AV3_ORYSJ^H2AV3_ORYSJ^Q:123-533,H:1-137^83.21%ID^E:1e-60^RecName: Full=Probable histone H2A variant 3                                             |
| YL1_CGCTCATT-TATAGCCT_comp60629_seq0 | NA     | 13 .                                                                                                                                                   |
| YS2_GAGATTCC-ATAGAGGC_comp1021_seq4  | NA     | 13 PAS2A_ORYSJ^PAS2A_ORYSJ^Q:2278-2910,H:1-211^73.93%ID^E:2e-95^.                                                                                      |
| YS1_GAGATTCC-TATAGCCT_comp17484_seq0 | NA     | 13 SILD_FORIN^SILD_FORIN^Q:1010-1288,H:9-101^61.29%ID^E:8e-23^RecName: Full=Secoisolariciresinol dehydrogenase                                         |
| OL3_CGCTCATT-GGCTCTGA_comp24855_seq0 | NA     | 14 .                                                                                                                                                   |
| YS1_GAGATTCC-TATAGCCT_comp8170_seq2  | NA     | 14 RSH3C_ARATH^RSH3C_ARATH^Q:1477-1905,H:215-345^47.55%ID^E:1e-24^RecName: Full=Probable GTP diphosphokinase RSH3, chloroplastic                       |
| OL1_CGCTCATT-CCTATCCT_comp31_seq2    | NA     | 14 SFH6_ARATH^SFH6_ARATH^Q:1951-2721,H:37-295^62.5%ID^E:9e-115^RecName: Full=Phosphatidylinositol/phosphatidylcholine transfer protein SFH6            |
| OL3_CGCTCATT-GGCTCTGA_comp21501_seq0 | NA     | 14 .                                                                                                                                                   |
| YL1_CGCTCATT-TATAGCCT_comp1669_seq5  | NA     | 14 INO1_TOBAC^INO1_TOBAC^Q:1075-2211,H:132-510^94.2%ID^E:0^RecName: Full=Inositol-3-phosphate synthase                                                 |
| YL1_CGCTCATT-TATAGCCT_comp18714_seq1 | NA     | 14 .                                                                                                                                                   |
| YL1_CGCTCATT-TATAGCCT_comp1354_seq1  | GATA1  | 14 P2C09_ORYSJ^P2C09_ORYSJ^Q:1416-1853,H:252-413^67.28%ID^E:5e-55^RecName: Full=Probable protein phosphatase 2C 9                                      |
| YL1_CGCTCATT-TATAGCCT_comp20874_seq0 | NA     | 14 .                                                                                                                                                   |
| OL3_CGCTCATT-GGCTCTGA_comp4703_seq4  | NA     | 14 APG3_ARATH^APG3_ARATH^Q:408-1211,H:50-317^83.58%ID^E:3e-149^RecName: Full=Peptide chain release factor APG3, chloroplastic {ECO:0000305}            |
| YL1_CGCTCATT-TATAGCCT_comp15844_seq2 | NA     | 14 .                                                                                                                                                   |
| AR1_GAGATTCC-CCTATCCT_comp303_seq2   | NA     | 15 .                                                                                                                                                   |
| AR1_GAGATTCC-CCTATCCT_comp521_seq0   | ZCT3   | 15 ZAT10_ARATH^ZAT10_ARATH^Q:199-912,H:1-223^49.8%ID^E:8e-57^RecName: Full=Zinc finger protein ZAT10                                                   |
| AR1_GAGATTCC-CCTATCCT_comp814_seq11  | NA     | 15 PGLR_VITVI^PGLR_VITVI^Q:2138-3325,H:59-455^51.39%ID^E:5e-124^RecName: Full=Probable polygalacturonase                                               |
| AR1_GAGATTCC-CCTATCCT_comp1653_seq0  | NA     | 15 PLA2A_ARATH^PLA2A_ARATH^Q:172-600,H:3-145^55.17%ID^E:3e-50^RecName: Full=Phospholipase A2-alpha {ECO:0000303 PubMed:16140037}                       |
| AR1_GAGATTCC-CCTATCCT_comp2186_seq5  | NA     | 15 B3GT7_ARATH^B3GT7_ARATH^Q:740-1732,H:88-308^52.11%ID^E:1e-79^RecName: Full=Beta-1,3-galactosyltransferase 7                                         |
| AR1_GAGATTCC-CCTATCCT_comp737_seq2   | ZCT1   | 15 ZAT12_ARATH^ZAT12_ARATH^Q:298-639,H:5-109^57.39%ID^E:2e-29^RecName: Full=Zinc finger protein ZAT12                                                  |
| YL3_CGCTCATT-ATAGAGGC_comp1769_seq0  | NA     | 15 PUMP5_ARATH^PUMP5_ARATH^Q:384-1355,H:1-311^73.39%ID^E:4e-146^RecName: Full=Mitochondrial uncoupling protein 5                                       |
| AR1_GAGATTCC-CCTATCCT_comp3339_seq0  | NA     | 15 .                                                                                                                                                   |
| AR1_GAGATTCC-CCTATCCT_comp20837_seq1 | NA     | 15 WRK33_ARATH^WRK33_ARATH^Q:514-909,H:194-328^56.74%ID^E:8e-26^RecName: Full=Probable WRKY transcription factor 33                                    |
| YS1_GAGATTCC-TATAGCCT_comp11393_seq0 | NA     | 15 .                                                                                                                                                   |
| AR2_GAGATTCC-GGCTCTGA_comp5642_seq3  | NA     | 15 E70A1_ARATH^E70A1_ARATH^Q:306-2003,H:66-627^29.11%ID^E:4e-77^RecName: Full=Exocyst complex component EXO70A1                                        |
| AR1_GAGATTCC-CCTATCCT_comp19692_seq0 | NA     | 15 .                                                                                                                                                   |
| YL1_CGCTCATT-TATAGCCT_comp1138_seq1  | NA     | 15 XTH2_SOYBN^XTH2_SOYBN^Q:154-936,H:30-283^66.28%ID^E:6e-117^RecName: Full=Xyloglucan endotransglucosylase/hydrolase 2 {ECO:0000250 UniProtKB:Q38857} |
| YL1_CGCTCATT-TATAGCCT_comp2433_seq0  | NA     | 15 CML31_ORYSJ^CML31_ORYSJ^Q:354-752,H:15-150^49.26%ID^E:5e-32^RecName: Full=Probable calcium-binding protein CML31                                    |
| AR1_GAGATTCC-CCTATCCT_comp15923_seq0 | NA     | 15 .                                                                                                                                                   |
| AR1_GAGATTCC-CCTATCCT_comp15349_seq0 | NA     | 15 .                                                                                                                                                   |
| AR2_GAGATTCC-GGCTCTGA_comp25525_seq0 | NA     | 15 .                                                                                                                                                   |
| YL1_CGCTCATT-TATAGCCT_comp1591_seq0  | NA     | 15 RAP24_ARATH^RAP24_ARATH^Q:953-1651,H:76-329^56.03%ID^E:7e-60^RecName: Full=Ethylene-responsive transcription factor RAP2-4                          |
| AR1_GAGATTCC-CCTATCCT_comp3391_seq0  | NA     | 15 .                                                                                                                                                   |
| AR1_GAGATTCC-CCTATCCT_comp19574_seq0 | NA     | 15 .                                                                                                                                                   |
| YL1_CGCTCATT-TATAGCCT_comp8028_seq1  | NA     | 15 NAC81_ARATH^NAC81_ARATH^Q:626-901,H:54-147^90.43%ID^E:2e-39^RecName: Full=Protein ATAF2                                                             |
| AR1_GAGATTCC-CCTATCCT_comp21765_seq0 | NA     | 15 .                                                                                                                                                   |
| AR2_GAGATTCC-GGCTCTGA_comp3473_seq2  | NA     | 15 WRK40_ARATH^WRK40_ARATH^Q:1211-1579,H:183-302^48.82%ID^E:3e-24^RecName: Full=Probable WRKY transcription factor 40                                  |
| YL1_CGCTCATT-TATAGCCT_comp20940_seq0 | NA     | 15 .                                                                                                                                                   |
| AR2_GAGATTCC-GGCTCTGA_comp1098_seq4  | NA     | 15 RTNLQ_ARATH^RTNLQ_ARATH^Q:222-1385,H:4-373^50%ID^E:1e-91^RecName: Full=Reticulon-like protein B17                                                   |

TableS2

|                                      |        |                                                                                                                                                         |
|--------------------------------------|--------|---------------------------------------------------------------------------------------------------------------------------------------------------------|
| AR1_GAGATTCC-CCTATCCT_comp26846_seq1 | NA     | 15 .                                                                                                                                                    |
| YL1_CGCTCATT-TATAGCCT_comp34042_seq0 | NA     | 15 .                                                                                                                                                    |
| OL3_CGCTCATT-GGCTCTGA_comp30250_seq0 | NA     | 15 RS13_SOYBN^ARS13_SOYBN^Q:100-519,H:1-140^92.86%ID^E:5e-86^RecName: Full=40S ribosomal protein S13                                                    |
| AR2_GAGATTCC-GGCTCTGA_comp2596_seq1  | NA     | 15 RING1_GOSHI^RING1_GOSHI^Q:682-1068,H:163-287^46.15%ID^E:1e-31^RecName: Full=E3 ubiquitin-protein ligase RING1                                        |
| AR1_GAGATTCC-CCTATCCT_comp21983_seq0 | NA     | 15 .                                                                                                                                                    |
| OL3_CGCTCATT-GGCTCTGA_comp62954_seq0 | NA     | 15 ARFF_ORYSJ^ARFF_ORYSJ^Q:192-365,H:164-221^89.66%ID^E:3e-51^RecName: Full=Auxin response factor 6                                                     |
| YL1_CGCTCATT-TATAGCCT_comp2206_seq7  | NA     | 15 WRK40_ARATH^WRK40_ARATH^Q:1321-1728,H:165-302^44.59%ID^E:1e-21^RecName: Full=Probable WRKY transcription factor 40                                   |
| AR2_GAGATTCC-GGCTCTGA_comp656_seq7   | NA     | 15 COBRA_ARATH^COBRA_ARATH^Q:469-1668,H:35-435^83.79%ID^E:0^RecName: Full=Protein COBRA                                                                 |
| AR1_GAGATTCC-CCTATCCT_comp2897_seq1  | NA     | 15 .                                                                                                                                                    |
| AR2_GAGATTCC-GGCTCTGA_comp630_seq3   | CrERF5 | 15 ERF5_NICSY^ERF5_NICSY^Q:157-1017,H:1-282^46.28%ID^E:6e-47^RecName: Full=Ethylene-responsive transcription factor 5                                   |
| YL1_CGCTCATT-TATAGCCT_comp1014_seq1  | NA     | 16 QCR72_ARATH^QCR72_ARATH^Q:416-775,H:3-122^73.33%ID^E:2e-53^RecName: Full=Cytochrome b-c1 complex subunit 7-2                                         |
| AR2_GAGATTCC-GGCTCTGA_comp36070_seq0 | NA     | 16 VAP12_ARATH^VAP12_ARATH^Q:1450-2037,H:40-221^62.63%ID^E:1e-71^RecName: Full=Vesicle-associated protein 1-2                                           |
| AR2_GAGATTCC-GGCTCTGA_comp10915_seq2 | NA     | 16 .                                                                                                                                                    |
| AR1_GAGATTCC-CCTATCCT_comp4311_seq2  | NA     | 16 .                                                                                                                                                    |
| YL1_CGCTCATT-TATAGCCT_comp32_seq1    | GO     | 16 C7BL3_CICIN^C7BL3_CICIN^Q:361-1737,H:37-488^38.7%ID^E:9e-111^RecName: Full=Costunolide synthase                                                      |
| YS2_GAGATTCC-ATAGAGGC_comp7642_seq3  | NA     | 16 HCS2_ARATH^HCS2_ARATH^Q:280-1245,H:9-329^65.02%ID^E:1e-143^RecName: Full=Biotin--protein ligase 2                                                    |
| OL1_CGCTCATT-CCTATCCT_comp6428_seq0  | NA     | 16 M2K9_ARATH^M2K9_ARATH^Q:288-1262,H:1-308^60.43%ID^E:2e-114^RecName: Full=Mitogen-activated protein kinase kinase 9                                   |
| YL1_CGCTCATT-TATAGCCT_comp32588_seq0 | NA     | 16 .                                                                                                                                                    |
| OL3_CGCTCATT-GGCTCTGA_comp1418_seq0  | T19H   | 17 C71A2_SOLME^C71A2_SOLME^Q:587-1945,H:46-503^50.33%ID^E:6e-151^RecName: Full=Cytochrome P450 71A2                                                     |
| OL3_CGCTCATT-GGCTCTGA_comp132_seq7   | NA     | 17 FRO6_ARATH^FRO6_ARATH^Q:3030-4742,H:189-738^57.9%ID^E:0^RecName: Full=Ferric reduction oxidase 6                                                     |
| OL3_CGCTCATT-GGCTCTGA_comp15162_seq0 | NA     | 17 .                                                                                                                                                    |
| YL1_CGCTCATT-TATAGCCT_comp12179_seq1 | NA     | 17 BOR4_ARATH^BOR4_ARATH^Q:168-2138,H:6-669^69.66%ID^E:0^RecName: Full=Boron transporter 4                                                              |
| OL3_CGCTCATT-GGCTCTGA_comp7365_seq1  | NA     | 17 RNHX1_ARATH^RNHX1_ARATH^Q:783-2540,H:1-584^25.62%ID^E:5e-41^RecName: Full=Putative ribonuclease H protein At1g65750                                  |
| OL3_CGCTCATT-GGCTCTGA_comp1249_seq0  | NA     | 17 .                                                                                                                                                    |
| OL1_CGCTCATT-CCTATCCT_comp119_seq1   | NA     | 17 .                                                                                                                                                    |
| OL1_CGCTCATT-CCTATCCT_comp368_seq0   | NA     | 18 METE_CATRO^METE_CATRO^Q:156-2450,H:1-765^95.16%ID^E:0^RecName: Full=5-methyltetrahydropteroyltriglutamate--homocysteine methyltransferase            |
| AR2_GAGATTCC-GGCTCTGA_comp3587_seq0  | NA     | 18 IDH1_ARATH^IDH1_ARATH^Q:613-1503,H:67-367^87.71%ID^E:8e-171^RecName: Full=Isocitrate dehydrogenase [NAD] regulatory subunit 1, mitochondrial         |
| YL3_CGCTCATT-ATAGAGGC_comp5981_seq5  | NA     | 18 APY2_ARATH^APY2_ARATH^Q:2126-2938,H:201-471^71.59%ID^E:1e-120^RecName: Full=Apyrase 2                                                                |
| YS2_GAGATTCC-ATAGAGGC_comp1097_seq5  | NA     | 18 .                                                                                                                                                    |
| AR1_GAGATTCC-CCTATCCT_comp6659_seq0  | NA     | 18 .                                                                                                                                                    |
| AR2_GAGATTCC-GGCTCTGA_comp7061_seq1  | NA     | 18 PXL1_ARATH^PXL1_ARATH^Q:167-3247,H:1-1029^63.89%ID^E:0^RecName: Full=Leucine-rich repeat receptor-like protein kinase PXL1                           |
| YL1_CGCTCATT-TATAGCCT_comp13796_seq1 | NA     | 18 S61G2_ARATH^S61G2_ARATH^Q:3-206,H:2-69^89.71%ID^E:9e-23^RecName: Full=Protein transport protein Sec61 subunit gamma-2                                |
| AR1_GAGATTCC-CCTATCCT_comp2488_seq0  | NA     | 18 ACS_ARATH^ACS_ARATH^Q:1426-1989,H:540-727^87.77%ID^E:8e-94^RecName: Full=Acetyl-coenzyme A synthetase, chloroplastic/glyoxysomal                     |
| AR2_GAGATTCC-GGCTCTGA_comp5665_seq0  | ZCT2   | 18 PI3K_ARATH^PI3K_ARATH^Q:1-309,H:712-814^95.15%ID^E:4e-57^RecName: Full=Phosphatidylinositol 3-kinase VPS34                                           |
| AR1_GAGATTCC-CCTATCCT_comp7698_seq2  | NA     | 18 BIG1_ARATH^BIG1_ARATH^Q:1905-7001,H:2-1685^66.3%ID^E:0^RecName: Full=Brefeldin A-inhibited guanine nucleotide-exchange protein 1                     |
| AR1_GAGATTCC-CCTATCCT_comp2717_seq1  | NA     | 18 TMCO1_RAT^TMCO1_RAT^Q:195-743,H:5-184^44.15%ID^E:5e-40^RecName: Full=Transmembrane and coiled-coil domains protein 1                                 |
| YL3_CGCTCATT-ATAGAGGC_comp3830_seq1  | NA     | 18 .                                                                                                                                                    |
| AR1_GAGATTCC-CCTATCCT_comp8039_seq0  | GPPS   | 18 SPS3_ARATH^SPS3_ARATH^Q:300-1559,H:1-422^66.59%ID^E:0^RecName: Full=Solaneyl diphosphate synthase 3, chloroplastic/mitochondrial                     |
| AR1_GAGATTCC-CCTATCCT_comp17606_seq0 | NA     | 18 .                                                                                                                                                    |
| YS2_GAGATTCC-ATAGAGGC_comp287_seq1   | HDS    | 18 ISPG_ARATH^ISPG_ARATH^Q:239-2449,H:1-737^86.02%ID^E:0^RecName: Full=4-hydroxy-3-methylbut-2-en-1-yl diphosphate synthase (ferredoxin), chloroplastic |
| AR2_GAGATTCC-GGCTCTGA_comp1042_seq4  | NA     | 18 .                                                                                                                                                    |
| AR1_GAGATTCC-CCTATCCT_comp1722_seq0  | NA     | 18 THCAS_CANSA^THCAS_CANSA^Q:162-1625,H:46-540^45.96%ID^E:2e-130^RecName: Full=Tetrahydrocannabinolic acid synthase                                     |
| OL3_CGCTCATT-GGCTCTGA_comp4392_seq1  | NA     | 18 CYC_ABUTH^CYC_ABUTH^Q:140-472,H:1-111^94.59%ID^E:2e-70^RecName: Full=Cytochrome c                                                                    |
| YL1_CGCTCATT-TATAGCCT_comp6904_seq2  | NA     | 18 INVA_VICFA^INVA_VICFA^Q:6713-8377,H:71-630^70%ID^E:0^RecName: Full=Acid beta-fructofuranosidase                                                      |

TableS2

|                                      |        |                                                                                                                                                                    |
|--------------------------------------|--------|--------------------------------------------------------------------------------------------------------------------------------------------------------------------|
| YL3_CGCTCATT-ATAGAGGC_comp826_seq0   | NA     | 18 14334_SOLLC^14334_SOLLC^Q:652-1428,H:4-260^79.15%ID^E:9e-140^RecName: Full=14-3-3 protein 4                                                                     |
| YL3_CGCTCATT-ATAGAGGC_comp116_seq0   | NA     | 18 RL9_PEA^RL9_PEA^Q:447-815,H:1-123^82.11%ID^E:7e-67^RecName: Full=60S ribosomal protein L9                                                                       |
| YL3_CGCTCATT-ATAGAGGC_comp3473_seq0  | NA     | 18 METK1_CATRO^METK1_CATRO^Q:99-1277,H:1-393^96.95%ID^E:0^RecName: Full=S-adenosylmethionine synthase 1                                                            |
| AR1_GAGATTCC-CCTATCCT_comp1014_seq2  | NA     | 18 NOTUM_MOUSE^NOTUM_MOUSE^Q:2970-3719,H:106-368^29.7%ID^E:3e-23^RecName: Full=Palmitoleoyl-protein carboxylesterase NOTUM [ECO:0000250 UniProtKB:Q6P988]          |
| YL3_CGCTCATT-ATAGAGGC_comp56582_seq0 | NA     | 18 PKHA8_RAT^PKHA8_RAT^Q:531-965,H:327-471^34.93%ID^E:6e-21^RecName: Full=Pleckstrin homology domain-containing family A member 8                                  |
| AR1_GAGATTCC-CCTATCCT_comp46_seq0    | NA     | 18 SAHH_CATRO^SAHH_CATRO^Q:259-1713,H:1-485^94.85%ID^E:0^RecName: Full=Adenosylhomocysteinase                                                                      |
| AR1_GAGATTCC-CCTATCCT_comp12098_seq0 | NA     | 18 UBP1_ARATH^UBP1_ARATH^Q:934-1974,H:785-1083^40.17%ID^E:2e-56^RecName: Full=Ubiquitin carboxyl-terminal hydrolase 1                                              |
| OL1_CGCTCATT-CCTATCCT_comp1720_seq1  | NA     | 19 FLS_PETHY^FLS_PETHY^Q:113-1117,H:13-348^75%ID^E:2e-157^RecName: Full=Flavonol synthase/flavanone 3-hydroxylase                                                  |
| YS2_GAGATTCC-ATAGAGGC_comp9582_seq0  | NA     | 19 HYES_HUMAN^HYES_HUMAN^Q:110-1027,H:237-544^33.02%ID^E:4e-36^RecName: Full=Bifunctional epoxide hydrolase 2                                                      |
| OL1_CGCTCATT-CCTATCCT_comp520_seq1   | IO     | 19 C76A2_SOLME^C76A2_SOLME^Q:383-1777,H:43-503^50.97%ID^E:6e-168^RecName: Full=Cytochrome P450 76A2                                                                |
| YS1_GAGATTCC-TATAGCCT_comp5894_seq4  | NA     | 19 PERK1_ARATH^PERK1_ARATH^Q:1022-2218,H:252-651^79.25%ID^E:0^RecName: Full=Proline-rich receptor-like protein kinase PERK1                                        |
| AR1_GAGATTCC-CCTATCCT_comp37384_seq0 | NA     | 19 .                                                                                                                                                               |
| YL1_CGCTCATT-TATAGCCT_comp24385_seq0 | NA     | 19 TRBP2_ARATH^TRBP2_ARATH^Q:3-227,H:165-239^98.67%ID^E:2e-39^RecName: Full=Tryptophan synthase beta chain 2, chloroplastic                                        |
| YL3_CGCTCATT-ATAGAGGC_comp17087_seq0 | NA     | 19 .                                                                                                                                                               |
| YS2_GAGATTCC-ATAGAGGC_comp5954_seq0  | NA     | 20 E70B1_ARATH^E70B1_ARATH^Q:239-2152,H:1-620^64.75%ID^E:0^RecName: Full=Exocyst complex component EXO70B1                                                         |
| YL3_CGCTCATT-ATAGAGGC_comp11008_seq1 | NA     | 20 .                                                                                                                                                               |
| OL3_CGCTCATT-GGCTCTGA_comp13259_seq1 | NA     | 20 CLPX_SPHWW^CLPX_SPHWW^Q:642-1646,H:65-404^54.55%ID^E:4e-118^RecName: Full=ATP-dependent Clp protease ATP-binding subunit ClpX [ECO:0000255 HAMAP-Rule:MF_00175] |
| YL3_CGCTCATT-ATAGAGGC_comp32910_seq0 | NA     | 20 .                                                                                                                                                               |
| YS2_GAGATTCC-ATAGAGGC_comp6479_seq1  | NA     | 20 ADT1_GOSHI^ADT1_GOSHI^Q:155-1318,H:1-386^83.76%ID^E:0^RecName: Full=ADP,ATP carrier protein 1, mitochondrial                                                    |
| AR1_GAGATTCC-CCTATCCT_comp3108_seq0  | T3R    | 20 10HGO_CATRO^10HGO_CATRO^Q:164-1228,H:2-360^63.51%ID^E:1e-145^RecName: Full=8-hydroxygeraniol dehydrogenase                                                      |
| OL1_CGCTCATT-CCTATCCT_comp209_seq10  | NA     | 20 .                                                                                                                                                               |
| YS1_GAGATTCC-TATAGCCT_comp6840_seq0  | NA     | 20 .                                                                                                                                                               |
| YL3_CGCTCATT-ATAGAGGC_comp30598_seq0 | NA     | 20 .                                                                                                                                                               |
| AR2_GAGATTCC-GGCTCTGA_comp29260_seq0 | NA     | 21 .                                                                                                                                                               |
| AR1_GAGATTCC-CCTATCCT_comp14477_seq0 | ORCA3  | 21 ERF99_ARATH^ERF99_ARATH^Q:401-604,H:70-136^72.06%ID^E:6e-25^RecName: Full=Ethylene-responsive transcription factor 13                                           |
| AR1_GAGATTCC-CCTATCCT_comp6627_seq1  | NA     | 21 .                                                                                                                                                               |
| AR1_GAGATTCC-CCTATCCT_comp18379_seq1 | NA     | 21 .                                                                                                                                                               |
| AR1_GAGATTCC-CCTATCCT_comp2945_seq0  | NA     | 21 RA51B_ARATH^RA51B_ARATH^Q:6971-8011,H:26-370^66.57%ID^E:4e-122^RecName: Full=DNA repair protein RAD51 homolog 2                                                 |
| YS2_GAGATTCC-ATAGAGGC_comp9578_seq1  | NA     | 21 Y4374_ARATH^Y4374_ARATH^Q:320-2167,H:18-635^56.05%ID^E:0^RecName: Full=Probable inactive receptor kinase At4g23740                                              |
| OL3_CGCTCATT-GGCTCTGA_comp25748_seq0 | NA     | 22 .                                                                                                                                                               |
| YS1_GAGATTCC-TATAGCCT_comp40843_seq0 | NA     | 22 .                                                                                                                                                               |
| YS1_GAGATTCC-TATAGCCT_comp8051_seq0  | NA     | 22 .                                                                                                                                                               |
| OL3_CGCTCATT-GGCTCTGA_comp21659_seq0 | NA     | 22 .                                                                                                                                                               |
| AR2_GAGATTCC-GGCTCTGA_comp12782_seq0 | NA     | 22 .                                                                                                                                                               |
| OL3_CGCTCATT-GGCTCTGA_comp34622_seq0 | NA     | 22 .                                                                                                                                                               |
| OL3_CGCTCATT-GGCTCTGA_comp2285_seq1  | NPF2.1 | 22 PTR21_ARATH^PTR21_ARATH^Q:684-2408,H:44-609^54.43%ID^E:0^RecName: Full=Protein NRT1/ PTR FAMILY 2.13                                                            |
| YS1_GAGATTCC-TATAGCCT_comp64350_seq0 | NA     | 22 .                                                                                                                                                               |
| YL1_CGCTCATT-TATAGCCT_comp16103_seq0 | NA     | 22 PEX13_ARATH^PEX13_ARATH^Q:451-735,H:202-304^66.02%ID^E:1e-27^RecName: Full=Peroxisomal membrane protein 13                                                      |
| YS2_GAGATTCC-ATAGAGGC_comp11235_seq0 | NA     | 23 CX32_ARATH^CX32_ARATH^Q:640-1569,H:63-369^69.03%ID^E:2e-150^RecName: Full=Probable serine/threonine-protein kinase Cx32, chloroplastic                          |
| OL3_CGCTCATT-GGCTCTGA_comp18596_seq0 | NA     | 23 .                                                                                                                                                               |
| OL1_CGCTCATT-CCTATCCT_comp22262_seq0 | NA     | 23 BPS1_ARATH^BPS1_ARATH^Q:994-1986,H:1-326^56.12%ID^E:4e-123^RecName: Full=Protein BPS1, chloroplastic                                                            |
| OL3_CGCTCATT-GGCTCTGA_comp2267_seq1  | VmTPT2 | 23 AB32G_ARATH^AB32G_ARATH^Q:1321-5580,H:1-1418^70.34%ID^E:0^RecName: Full=ABC transporter G family member 32 [ECO:0000303 PubMed:18299247]                        |
| YL1_CGCTCATT-TATAGCCT_comp12043_seq2 | NA     | 23 BCS1_SCHPO^BCS1_SCHPO^Q:1059-1733,H:195-423^29.05%ID^E:1e-24^RecName: Full=Probable mitochondrial chaperone bcs1                                                |
| OL1_CGCTCATT-CCTATCCT_comp671_seq2   | NA     | 23 SEC8_ARATH^SEC8_ARATH^Q:2372-5161,H:143-1053^68.17%ID^E:0^RecName: Full=Exocyst complex component SEC8                                                          |

TableS2

|                                      |        |                                                                                                                                                               |
|--------------------------------------|--------|---------------------------------------------------------------------------------------------------------------------------------------------------------------|
| OL1_CGCTCATT-CCTATCCT_comp13536_seq1 | NA     | 23 .                                                                                                                                                          |
| YS1_GAGATTCC-TATAGCCT_comp17664_seq1 | NA     | 23 P2C51_ARATH^P2C51_ARATH^Q:134-1405,H:30-447^54.55%ID^E:1e-139^RecName: Full=Probable protein phosphatase 2C 51                                             |
| OL3_CGCTCATT-GGCTCTGA_comp2330_seq3  | NA     | 24 .                                                                                                                                                          |
| YL3_CGCTCATT-ATAGAGGC_comp15500_seq0 | NA     | 24 Y1680_ARATH^Y1680_ARATH^Q:2339-4210,H:30-648^42.17%ID^E:9e-86^RecName: Full=Probable leucine-rich repeat receptor-like protein kinase At1g68400            |
| YL1_CGCTCATT-TATAGCCT_comp8450_seq0  | NA     | 24 YERG_SCHPO^YERG_SCHPO^Q:37-378,H:204-320^42.74%ID^E:8e-23^RecName: Full=Uncharacterized RING finger protein C2F3.16                                        |
| YS1_GAGATTCC-TATAGCCT_comp15900_seq1 | NA     | 24 SIGD_ARATH^SIGD_ARATH^Q:957-1427,H:258-414^54.78%ID^E:9e-82^RecName: Full=RNA polymerase sigma factor sigD, chloroplastic                                  |
| OL3_CGCTCATT-GGCTCTGA_comp3385_seq1  | NA     | 24 .                                                                                                                                                          |
| YS2_GAGATTCC-ATAGAGGC_comp1361_seq4  | NA     | 24 CYB5E_ARATH^CYB5E_ARATH^Q:2054-2449,H:2-133^81.82%ID^E:2e-70^RecName: Full=Cytochrome b5 isoform E {ECO:0000303 PubMed:19054355}                           |
| OL3_CGCTCATT-GGCTCTGA_comp8789_seq0  | NPF2.4 | 24 PTR53_ARATH^PTR53_ARATH^Q:121-1830,H:27-597^57.62%ID^E:0^RecName: Full=Protein NRT1/ PTR FAMILY 2.11                                                       |
| OL3_CGCTCATT-GGCTCTGA_comp35783_seq0 | NA     | 24 .                                                                                                                                                          |
| OL3_CGCTCATT-GGCTCTGA_comp19373_seq0 | NA     | 24 .                                                                                                                                                          |
| AR2_GAGATTCC-GGCTCTGA_comp2182_seq0  | NA     | 25 XCP1_ARATH^XCP1_ARATH^Q:155-1150,H:26-353^72.59%ID^E:0^RecName: Full=Xylem cysteine proteinase 1                                                           |
| YS1_GAGATTCC-TATAGCCT_comp17355_seq0 | NA     | 25 .                                                                                                                                                          |
| YL3_CGCTCATT-ATAGAGGC_comp25012_seq1 | NA     | 25 CSLCC_ARATH^CSLCC_ARATH^Q:1254-3374,H:1-699^78.22%ID^E:0^RecName: Full=Probable xyloglucan glycosyltransferase 12                                          |
| YS2_GAGATTCC-ATAGAGGC_comp3345_seq1  | MATE2  | 25 ALIS3_ARATH^ALIS3_ARATH^Q:2756-3742,H:22-349^75.99%ID^E:8e-171^RecName: Full=ALA-interacting subunit 3                                                     |
| AR2_GAGATTCC-GGCTCTGA_comp901_seq0   | NA     | 25 .                                                                                                                                                          |
| AR1_GAGATTCC-CCTATCCT_comp2521_seq4  | NA     | 25 UPL3_ARATH^UPL3_ARATH^Q:848-6109,H:151-1888^71.65%ID^E:0^RecName: Full=E3 ubiquitin-protein ligase UPL3                                                    |
| YS1_GAGATTCC-TATAGCCT_comp1496_seq2  | CMK    | 26 ISPE_SOLLCA^ISPE_SOLLCA^Q:362-1471,H:31-399^75.95%ID^E:2e-175^RecName: Full=4-diphosphocytidyl-2-C-methyl-D-erythritol kinase, chloroplastic/chromoplastic |
| AR2_GAGATTCC-GGCTCTGA_comp7989_seq1  | NA     | 26 .                                                                                                                                                          |
| AR1_GAGATTCC-CCTATCCT_comp4372_seq0  | NA     | 26 .                                                                                                                                                          |
| YS2_GAGATTCC-ATAGAGGC_comp147_seq0   | NA     | 26 RS33_ARATH^RS33_ARATH^Q:169-834,H:1-222^87.84%ID^E:3e-142^RecName: Full=40S ribosomal protein S3-3                                                         |
| YL1_CGCTCATT-TATAGCCT_comp29003_seq0 | NA     | 26 .                                                                                                                                                          |
| AR1_GAGATTCC-CCTATCCT_comp1690_seq3  | NA     | 26 PMT2_ARATH^PMT2_ARATH^Q:374-2215,H:1-616^76.45%ID^E:0^RecName: Full=Probable methyltransferase PMT2                                                        |
| YS2_GAGATTCC-ATAGAGGC_comp21925_seq0 | NA     | 26 .                                                                                                                                                          |
| AR1_GAGATTCC-CCTATCCT_comp3686_seq1  | NA     | 27 .                                                                                                                                                          |
| AR1_GAGATTCC-CCTATCCT_comp15754_seq0 | NA     | 27 .                                                                                                                                                          |
| AR1_GAGATTCC-CCTATCCT_comp10689_seq2 | DAT    | 27 DAT_CATRO^DAT_CATRO^Q:1-1251,H:5-437^54.71%ID^E:5e-150^RecName: Full=Deacetylvinidoline O-acetyltransferase                                                |
| AR2_GAGATTCC-GGCTCTGA_comp216_seq0   | NA     | 27 .                                                                                                                                                          |
| AR2_GAGATTCC-GGCTCTGA_comp22743_seq0 | NA     | 27 .                                                                                                                                                          |
| OL3_CGCTCATT-GGCTCTGA_comp5631_seq2  | GBF2   | 28 HBP1A_WHEAT^HBP1A_WHEAT^Q:439-1467,H:18-319^45.3%ID^E:4e-54^RecName: Full=Transcription factor HBP-1a                                                      |
| AR2_GAGATTCC-GGCTCTGA_comp2924_seq0  | NA     | 28 .                                                                                                                                                          |
| AR1_GAGATTCC-CCTATCCT_comp4693_seq1  | NA     | 28 .                                                                                                                                                          |
| YL3_CGCTCATT-ATAGAGGC_comp15371_seq1 | NA     | 28 RDR5_ARATH^RDR5_ARATH^Q:546-3176,H:114-975^48.45%ID^E:0^RecName: Full=Probable RNA-dependent RNA polymerase 5                                              |
| YL3_CGCTCATT-ATAGAGGC_comp4673_seq1  | NA     | 28 NSA2_HUMAN^NSA2_HUMAN^Q:2-265,H:149-236^78.41%ID^E:1e-42^RecName: Full=Ribosome biogenesis protein NSA2 homolog                                            |
| AR2_GAGATTCC-GGCTCTGA_comp9703_seq0  | NA     | 28 INVB_DAUCA^INVB_DAUCA^Q:1146-3059,H:4-656^67.48%ID^E:0^RecName: Full=Beta-fructofuranosidase, soluble isoenzyme I                                          |
| YS2_GAGATTCC-ATAGAGGC_comp6465_seq1  | NA     | 29 Y283_BACHD^Y283_BACHD^Q:829-1725,H:1-265^39.33%ID^E:1e-58^RecName: Full=Uncharacterized isomerase BH0283                                                   |
| YL3_CGCTCATT-ATAGAGGC_comp37282_seq0 | NA     | 29 .                                                                                                                                                          |
| AR1_GAGATTCC-CCTATCCT_comp12730_seq0 | NA     | 29 .                                                                                                                                                          |
| YL3_CGCTCATT-ATAGAGGC_comp1199_seq2  | NA     | 29 GSTX4_TOBAC^GSTX4_TOBAC^Q:401-1045,H:5-220^68.52%ID^E:6e-101^RecName: Full=Probable glutathione S-transferase                                              |
| YL3_CGCTCATT-ATAGAGGC_comp3815_seq0  | NA     | 29 CSK2C_ARATH^CSK2C_ARATH^Q:57-521,H:96-250^80%ID^E:2e-89^RecName: Full=Casein kinase II subunit beta'                                                       |
| YS2_GAGATTCC-ATAGAGGC_comp88_seq3    | LAMT   | 29 MT878_ARATH^MT878_ARATH^Q:389-1450,H:3-361^41.1%ID^E:4e-79^RecName: Full=Probable S-adenosylmethionine-dependent methyltransferase At5g38780               |
| YS1_GAGATTCC-TATAGCCT_comp3264_seq4  | NA     | 29 LOR12_ARATH^LOR12_ARATH^Q:1818-2432,H:9-205^50%ID^E:5e-54^RecName: Full=Protein LURP-one-related 12                                                        |
| AR2_GAGATTCC-GGCTCTGA_comp32417_seq0 | NA     | 29 .                                                                                                                                                          |
| AR1_GAGATTCC-CCTATCCT_comp19025_seq0 | NA     | 29 C2D61_ARATH^C2D61_ARATH^Q:2-235,H:285-362^79.49%ID^E:4e-34^RecName: Full=C2 domain-containing protein At1g53590                                            |



TableS2

|                                      |        |                                                                                                                                                           |
|--------------------------------------|--------|-----------------------------------------------------------------------------------------------------------------------------------------------------------|
| AR1_GAGATTCC-CCTATCCT_comp4621_seq0  | NA     | 29 BB_ARATH^BB_ARATH^Q:1423-1734,H:138-241^66.67%ID^E:5e-39^RecName: Full=E3 ubiquitin ligase BIG BROTHER                                                 |
| AR1_GAGATTCC-CCTATCCT_comp2309_seq1  | NA     | 29 HHP2_ARATH^HHP2_ARATH^Q:519-1337,H:75-356^60.07%ID^E:4e-79^RecName: Full=Heptahelical transmembrane protein 2                                          |
| YS1_GAGATTCC-TATAGCCT_comp9272_seq0  | NA     | 29 KPYC_SOLTU^KPYC_SOLTU^Q:840-1322,H:347-506^41.61%ID^E:6e-31^RecName: Full=Pyruvate kinase, cytosolic isozyme                                           |
| YS1_GAGATTCC-TATAGCCT_comp439_seq2   | HDR    | 30 ISPH_ARATH^ISPH_ARATH^Q:147-1547,H:1-466^78.09%ID^E:0^RecName: Full=4-hydroxy-3-methylbut-2-enyl diphosphate reductase, chloroplastic                  |
| OL1_CGCTCATT-CCTATCCT_comp161_seq5   | NA     | 30 FRO7_ARATH^FRO7_ARATH^Q:3155-5278,H:32-747^59.58%ID^E:0^RecName: Full=Ferric reduction oxidase 7, chloroplastic                                        |
| OL1_CGCTCATT-CCTATCCT_comp991_seq7   | NA     | 30 .                                                                                                                                                      |
| OL1_CGCTCATT-CCTATCCT_comp5868_seq2  | NA     | 30 MOC2B_ARATH^MOC2B_ARATH^Q:1951-2445,H:18-183^66.87%ID^E:7e-57^RecName: Full=Molybdopterin synthase catalytic subunit {ECO:0000255 HAMAP-Rule:MF_03052} |
| YS2_GAGATTCC-ATAGAGGC_comp6690_seq0  | NA     | 30 PERR_RAUSE^PERR_RAUSE^Q:232-1107,H:1-289^74.66%ID^E:2e-154^RecName: Full=Perakine reductase                                                            |
| OL1_CGCTCATT-CCTATCCT_comp9509_seq1  | NA     | 30 Y4885_ARATH^Y4885_ARATH^Q:309-2498,H:312-1041^42.57%ID^E:2e-172^RecName: Full=Probable LRR receptor-like serine/threonine-protein kinase At4g08850     |
| YL1_CGCTCATT-TATAGCCT_comp615_seq1   | NA     | 30 STR4_ARATH^STR4_ARATH^Q:734-1729,H:1-321^62.46%ID^E:5e-87^RecName: Full=Rhodanese-like domain-containing protein 4, chloroplastic                      |
| YS2_GAGATTCC-ATAGAGGC_comp9283_seq0  | NA     | 30 Y1480_ARATH^Y1480_ARATH^Q:312-1265,H:55-357^39.69%ID^E:3e-59^RecName: Full=Uncharacterized protein At1g18480                                           |
| YL1_CGCTCATT-TATAGCCT_comp4903_seq0  | NA     | 30 NIFU1_ARATH^NIFU1_ARATH^Q:212-703,H:66-230^79.39%ID^E:3e-63^RecName: Full=NifU-like protein 1, chloroplastic                                           |
| OL1_CGCTCATT-CCTATCCT_comp7103_seq2  | NA     | 30 RH41_ARATH^RH41_ARATH^Q:768-2225,H:12-490^59.8%ID^E:0^RecName: Full=DEAD-box ATP-dependent RNA helicase 41                                             |
| YL3_CGCTCATT-ATAGAGGC_comp1376_seq3  | NA     | 30 RVE8_ARATH^RVE8_ARATH^Q:203-565,H:31-151^82.64%ID^E:6e-47^RecName: Full=Protein REVEILLE 8                                                             |
| YL1_CGCTCATT-TATAGCCT_comp3675_seq3  | NA     | 30 SIGE_ARATH^SIGE_ARATH^Q:721-2280,H:1-516^62.93%ID^E:0^RecName: Full=RNA polymerase sigma factor sigE, chloroplastic/mitochondrial                      |
| YL1_CGCTCATT-TATAGCCT_comp12033_seq1 | NA     | 31 C90A1_ARATH^C90A1_ARATH^Q:285-1586,H:41-468^75.86%ID^E:0^RecName: Full=Cytochrome P450 90A1                                                            |
| YS2_GAGATTCC-ATAGAGGC_comp2127_seq1  | DXS1   | 31 PWD_ARATH^PWD_ARATH^Q:2912-6307,H:48-1196^63.9%ID^E:0^RecName: Full=Phosphoglucan, water dikinase, chloroplastic                                       |
| YL3_CGCTCATT-ATAGAGGC_comp4506_seq1  | NA     | 31 .                                                                                                                                                      |
| YS2_GAGATTCC-ATAGAGGC_comp11659_seq0 | NA     | 31 .                                                                                                                                                      |
| YS2_GAGATTCC-ATAGAGGC_comp8026_seq0  | NA     | 31 .                                                                                                                                                      |
| YL1_CGCTCATT-TATAGCCT_comp11163_seq2 | NA     | 31 .                                                                                                                                                      |
| YL3_CGCTCATT-ATAGAGGC_comp38593_seq0 | NA     | 31 SYE_ARATH^SYE_ARATH^Q:709-1746,H:223-568^76.37%ID^E:0^.                                                                                                |
| AR2_GAGATTCC-GGCTCTGA_comp894_seq1   | NA     | 32 .                                                                                                                                                      |
| AR1_GAGATTCC-CCTATCCT_comp8273_seq2  | NA     | 32 S38A7_DANRE^S38A7_DANRE^Q:251-1336,H:56-409^25.33%ID^E:2e-25^RecName: Full=Putative sodium-coupled neutral amino acid transporter 7                    |
| YS1_GAGATTCC-TATAGCCT_comp13751_seq2 | TS     | 32 LAX3_MEDTR^LAX3_MEDTR^Q:2-1273,H:42-465^89.15%ID^E:0^RecName: Full=Auxin transporter-like protein 3                                                    |
| AR2_GAGATTCC-GGCTCTGA_comp3252_seq1  | NA     | 32 CTR1_ARATH^CTR1_ARATH^Q:2705-3418,H:562-805^49.59%ID^E:2e-69^RecName: Full=Serine/threonine-protein kinase CTR1 {ECO:0000303 PubMed:8431946}           |
| YS2_GAGATTCC-ATAGAGGC_comp2275_seq1  | NA     | 32 PPME1_MOUSE^PPME1_MOUSE^Q:263-1162,H:13-372^43.61%ID^E:2e-93^RecName: Full=Protein phosphatase methylesterase 1                                        |
| YL1_CGCTCATT-TATAGCCT_comp13794_seq0 | NA     | 33 .                                                                                                                                                      |
| YS1_GAGATTCC-TATAGCCT_comp3725_seq0  | GBF1   | 33 CPRF1_PETCR^CPRF1_PETCR^Q:479-1702,H:1-406^54.33%ID^E:8e-136^RecName: Full=Common plant regulatory factor 1                                            |
| YS1_GAGATTCC-TATAGCCT_comp19403_seq0 | NA     | 33 .                                                                                                                                                      |
| YS1_GAGATTCC-TATAGCCT_comp15574_seq0 | NA     | 33 CFI_CAMSI^CFI_CAMSI^Q:122-673,H:37-219^70.65%ID^E:2e-89^RecName: Full=Chalcone--flavonone isomerase                                                    |
| YL1_CGCTCATT-TATAGCCT_comp11427_seq0 | NA     | 33 DCP1_ARATH^DCP1_ARATH^Q:257-907,H:1-211^77.52%ID^E:2e-108^RecName: Full=mRNA-decapping enzyme-like protein                                             |
| AR2_GAGATTCC-GGCTCTGA_comp24852_seq0 | NA     | 34 .                                                                                                                                                      |
| AR1_GAGATTCC-CCTATCCT_comp13415_seq0 | NA     | 34 HFA6B_ARATH^HFA6B_ARATH^Q:459-1457,H:47-402^50.68%ID^E:5e-106^RecName: Full=Heat stress transcription factor A-6b                                      |
| AR1_GAGATTCC-CCTATCCT_comp31298_seq0 | NA     | 34 .                                                                                                                                                      |
| AR1_GAGATTCC-CCTATCCT_comp42375_seq0 | NA     | 34 .                                                                                                                                                      |
| AR1_GAGATTCC-CCTATCCT_comp25166_seq0 | NA     | 34 .                                                                                                                                                      |
| AR1_GAGATTCC-CCTATCCT_comp821_seq3   | NA     | 34 PER5_VITVI^PER5_VITVI^Q:296-1213,H:26-328^55.56%ID^E:8e-105^RecName: Full=Peroxidase 5 {ECO:0000250 UniProtKB:P22195}                                  |
| AR2_GAGATTCC-GGCTCTGA_comp15931_seq0 | NA     | 34 PHT17_ORYSJ^PHT17_ORYSJ^Q:3-218,H:211-284^67.57%ID^E:9e-24^RecName: Full=Probable inorganic phosphate transporter 1-7                                  |
| AR2_GAGATTCC-GGCTCTGA_comp370_seq0   | NA     | 34 14KD_DAUCA^14KD_DAUCA^Q:321-569,H:54-136^67.47%ID^E:2e-28^RecName: Full=14 kDa proline-rich protein DC2.15                                             |
| YL3_CGCTCATT-ATAGAGGC_comp101_seq3   | redox2 | 34 MER_ERYCB^MER_ERYCB^Q:148-1101,H:4-327^54.77%ID^E:6e-114^RecName: Full=Methylecgonone reductase                                                        |
| AR1_GAGATTCC-CCTATCCT_comp1106_seq0  | NA     | 34 CERK1_ARATH^CERK1_ARATH^Q:244-2034,H:22-617^59.74%ID^E:0^RecName: Full=Chitin elicitor receptor kinase 1                                               |
| AR2_GAGATTCC-GGCTCTGA_comp12553_seq0 | NA     | 34 LORF2_MOUSE^LORF2_MOUSE^Q:1716-3227,H:397-895^27.41%ID^E:2e-42^RecName: Full=LINE-1 retrotransposable element ORF2 protein                             |
| AR1_GAGATTCC-CCTATCCT_comp16225_seq0 | NA     | 34 ACCH1_ARATH^ACCH1_ARATH^Q:118-960,H:12-288^50.18%ID^E:4e-73^RecName: Full=1-aminocyclopropane-1-carboxylate oxidase homolog 1                          |

TableS2

|                                      |         |                                                                                                                                                |
|--------------------------------------|---------|------------------------------------------------------------------------------------------------------------------------------------------------|
| AR1_GAGATTCC-CCTATCCT_comp30027_seq0 | NA      | 34 .                                                                                                                                           |
| AR2_GAGATTCC-GGCTCTGA_comp22761_seq0 | NA      | 34 .                                                                                                                                           |
| YL3_CGCTCATT-ATAGAGGC_comp5165_seq0  | NA      | 35 Y5102_ARATH^Y5102_ARATH^Q:1752-3065,H:1-410^75.8%ID^E:0^RecName: Full=Serine/threonine-protein kinase At5g01020                             |
| OL1_CGCTCATT-CCTATCCT_comp374_seq0   | GS1     | 35 MTDH_FRAAN^MTDH_FRAAN^Q:212-1258,H:10-356^57.02%ID^E:1e-115^RecName: Full=Probable mannitol dehydrogenase                                   |
| AR2_GAGATTCC-GGCTCTGA_comp10111_seq1 | NA      | 35 PYRD2_RAT^PYRD2_RAT^Q:122-1753,H:34-581^51.72%ID^E:0^RecName: Full=Pyridine nucleotide-disulfide oxidoreductase domain-containing protein 2 |
| AR1_GAGATTCC-CCTATCCT_comp696_seq16  | NA      | 35 BGH3B_BACO1^BGH3B_BACO1^Q:1249-2835,H:107-658^31.05%ID^E:4e-72^RecName: Full=Beta-glucosidase BoGH3B                                        |
| YS2_GAGATTCC-ATAGAGGC_comp6183_seq2  | NA      | 35 YIF1B_MOUSE^YIF1B_MOUSE^Q:488-1138,H:83-305^32.61%ID^E:5e-28^RecName: Full=Protein YIF1B                                                    |
| YL1_CGCTCATT-TATAGCCT_comp10608_seq0 | NA      | 35 SFT2B_HUMAN^SFT2B_HUMAN^Q:233-616,H:27-158^39.39%ID^E:4e-23^RecName: Full=Vesicle transport protein SFT2B                                   |
| AR1_GAGATTCC-CCTATCCT_comp977_seq0   | NA      | 35 SF3BA_ARATH^SF3BA_ARATH^Q:186-446,H:1-87^94.25%ID^E:8e-51^RecName: Full=Uncharacterized protein At3g23325                                   |
| AR1_GAGATTCC-CCTATCCT_comp6_seq2     | NA      | 36 .                                                                                                                                           |
| AR1_GAGATTCC-CCTATCCT_comp24292_seq0 | CrWRKY1 | 36 WRK70_ARATH^WRK70_ARATH^Q:551-766,H:109-180^62.5%ID^E:2e-21^RecName: Full=Probable WRKY transcription factor 70                             |
| AR1_GAGATTCC-CCTATCCT_comp3465_seq0  | NA      | 36 Y3272_ARATH^Y3272_ARATH^Q:414-1277,H:85-371^69.79%ID^E:4e-151^RecName: Full=Kelch repeat-containing protein At3g27220                       |
| AR1_GAGATTCC-CCTATCCT_comp572_seq0   | NA      | 36 .                                                                                                                                           |
| AR2_GAGATTCC-GGCTCTGA_comp1660_seq1  | BIS2    | 37 BH093_ARATH^BH093_ARATH^Q:717-1313,H:146-351^66.02%ID^E:2e-66^RecName: Full=Transcription factor bHLH93                                     |
| YS2_GAGATTCC-ATAGAGGC_comp11524_seq0 | NA      | 37 FBK9_ARATH^FBK9_ARATH^Q:114-1199,H:15-383^41.98%ID^E:4e-74^RecName: Full=F-box/kelch-repeat protein At1g23390                               |
| OL3_CGCTCATT-GGCTCTGA_comp23128_seq0 | NA      | 37 .                                                                                                                                           |
| OL3_CGCTCATT-GGCTCTGA_comp28247_seq0 | NA      | 37 .                                                                                                                                           |
| OL3_CGCTCATT-GGCTCTGA_comp55923_seq0 | NA      | 37 .                                                                                                                                           |
| OL3_CGCTCATT-GGCTCTGA_comp21836_seq0 | NA      | 37 .                                                                                                                                           |
| AR1_GAGATTCC-CCTATCCT_comp8890_seq1  | NA      | 38 AGL8_SOLTU^AGL8_SOLTU^Q:160-879,H:1-250^68.9%ID^E:2e-113^RecName: Full=Agamous-like MADS-box protein AGL8 homolog                           |
| AR1_GAGATTCC-CCTATCCT_comp12530_seq0 | D4H     | 38 DV4H_CATRO^DV4H_CATRO^Q:56-1183,H:24-400^67.72%ID^E:0^RecName: Full=Deacetoxyvindoline 4-hydroxylase                                        |
| AR1_GAGATTCC-CCTATCCT_comp13728_seq0 | NA      | 38 .                                                                                                                                           |
| AR2_GAGATTCC-GGCTCTGA_comp26468_seq0 | NA      | 39 .                                                                                                                                           |
| AR1_GAGATTCC-CCTATCCT_comp18788_seq0 | MATE1   | 39 TT12_ARATH^TT12_ARATH^Q:204-1712,H:3-492^47.34%ID^E:5e-141^.                                                                                |

Table S3

| Primers                                                                                                                                                                                                                                                                                                                                                                                  | Sequence (5' - 3')                                                                                                                                                                                                                                                                                                                                                                                                  | Application                                                                       |
|------------------------------------------------------------------------------------------------------------------------------------------------------------------------------------------------------------------------------------------------------------------------------------------------------------------------------------------------------------------------------------------|---------------------------------------------------------------------------------------------------------------------------------------------------------------------------------------------------------------------------------------------------------------------------------------------------------------------------------------------------------------------------------------------------------------------|-----------------------------------------------------------------------------------|
| vm16OMT1like-for<br>vm16OMT1like-rev<br>yYS1_comp1836_seq0-for<br>yYS1_comp1836_seq0-rev                                                                                                                                                                                                                                                                                                 | CTGAGAAGATCTATGGATGCGAAAGTGGATGAGTTAG<br>CTGAGAAGATCTTTAAGGATAAACCTCAATGACACTTCTAATG<br>CTGAGAGGATCCATGGATCTTGAAGCTTCTGAGATTCGT<br>CTGAGAGGATCCAGGATATACCTCAATAGGACACCTGAAATCTA                                                                                                                                                                                                                                     | Heterologous expression of tabersonine 16-O-methyltransferase candidates in yeast |
| vm16OMTYFP-for<br>vm16OMTYFP-rev                                                                                                                                                                                                                                                                                                                                                         | CTGAGAAGTGTAGTGGATGCGAAAGTGGATGAGTTAG<br>CTGAGAAGTGTAGGATAAACCTCAATGACACTTCTAATG                                                                                                                                                                                                                                                                                                                                    | Subcellular localization studies                                                  |
| qVmActin-for<br>qVmActin-rev<br>qVm16OMT-for - (YS2_comp61_seq0)<br>qVm16OMT-rev - (YS2_comp61_seq0)<br>qVmYL1_comp255_seq0-for<br>qVmYL1_comp255_seq0-rev<br>qVmOL3_comp1418_seq0-for<br>qVmOL3_comp1418_seq0-rev<br>qVmOL3_comp1489_seq0-for<br>qVmOL3_comp1489_seq0-rev<br>qVmAR1_comp3108_seq0-for<br>qVmAR1_comp3108_seq0-rev<br>qVmYS2_comp528_seq2-for<br>qVmYS2_comp528_seq2-rev | GGAGCTGAGAGATCCGTTG<br>GAATTCCTGCAGCTTCCATC<br>CAGTTATCTATGGACATGGGCATGA<br>TTAGAAATTGAATTAGTACATTGTCCCT<br>CTACTACACTTCCCTTTAAGAGACGT<br>ACTTTGGGGCAAAATATATCCACTAA<br>TGTAGAACTTGCAATGGCAAAATTTGAT<br>TCTGTTCTCGTTTGTGTTCCACTAT<br>GATATGACAGAGAAATTTGGGTTGACA<br>ACGCTTTCGCCTGGAATAATAAGTG<br>CAGAACACAATATAGTTGCAGACGTT<br>ACATAGGAAACACTCTAAAATCTGCAT<br>TTCCATTTGATGGAAACTTTATGGT<br>AGGCATGTGCAAAATGTGCAATCC | qPCR analysis                                                                     |
